# Supplementary material for: Mg(OMe)2 promoted allylic isomerization of γ-hydroxy-α,β-alkenoic esters to synthesize γ-ketone esters
Source: Royal Society of Chemistry journal article supplement (doi:10.1039/c7ob00131b), 2017-01-01

## Supporting Information

### Mg(OMe)<sub>2</sub> Promoted Allylic Isomerization of $\gamma$ -Hydroxy- $\alpha$ , $\beta$ -Alkenoic Esters to The Synthesis of $\gamma$ -Ketone Esters

Luhao Lai,<sup>a</sup> A-Ni Li,<sup>b</sup> Jiawei Zhou,<sup>a</sup> Yarong Guo,<sup>a</sup> Li Lin,<sup>a\*</sup> Wei Chen,<sup>a</sup> and Rui Wang<sup>a\*</sup>

<sup>a</sup> School of Life Sciences, School of Basic Medical Sciences, Institute of Biochemistry and Molecular Biology, and Key Laboratory of Preclinical Study for New Drugs of Gansu Province, Lanzhou University, Lanzhou 730000, China, <sup>b</sup> The first laboratory of Lanzhou Institute of Biological Products Co., Ltd., Lanzhou 730046, China.

|                                                                                                             |                |
|-------------------------------------------------------------------------------------------------------------|----------------|
| <b>General Methods and Synthesis of the Substrates</b>                                                      | <b>S2</b>      |
| <b>General Procedure for the Allylic Isomerization</b>                                                      | <b>S3</b>      |
| <b>Characterization of <math>\gamma</math>-Keto Ester 2</b>                                                 | <b>S3-S5</b>   |
| <b>Synthesis of <i>D</i>-1o and Deuteration Experiment</b>                                                  | <b>S6</b>      |
| <b>Synthesis of Methyl <math>\gamma</math>-Methoxy-<math>\gamma</math>-phenylbutenate 7</b>                 | <b>S7</b>      |
| <b>Synthesis of (<i>E</i>)- <math>\alpha</math>-benzylidene-<math>\gamma</math>-phenyl butyrolactone 12</b> | <b>S8-S9</b>   |
| <b>References for the Supporting Information</b>                                                            | <b>S9</b>      |
| <b><sup>1</sup>H and <sup>13</sup>C NMR Spectra of <math>\gamma</math>-Keto Ester 2</b>                     | <b>S10-S39</b> |
| <b><sup>1</sup>H and <sup>13</sup>C NMR Spectra of (<i>E</i>)-1o</b>                                        | <b>S40-S41</b> |
| <b><sup>1</sup>H and <sup>13</sup>C NMR Spectra of S3</b>                                                   | <b>S42-S43</b> |
| <b><sup>1</sup>H and <sup>13</sup>C NMR Spectra of S5</b>                                                   | <b>S44-S45</b> |
| <b><sup>1</sup>H NMR Spectra of <i>D</i>-1o</b>                                                             | <b>S46</b>     |
| <b><sup>1</sup>H NMR Spectra of S6</b>                                                                      | <b>S47</b>     |
| <b><sup>1</sup>H NMR Spectra of S5</b>                                                                      | <b>S48</b>     |
| <b><sup>1</sup>H and <sup>13</sup>C NMR Spectra of 7</b>                                                    | <b>S49-S52</b> |
| <b><sup>1</sup>H and <sup>13</sup>C NMR Spectra of 9</b>                                                    | <b>S53-S54</b> |
| <b><sup>1</sup>H and <sup>13</sup>C NMR Spectra of 10</b>                                                   | <b>S55-S56</b> |
| <b><sup>1</sup>H NMR Spectra of 12</b>                                                                      | <b>S57-S59</b> |

**General Methods.** Unless otherwise noted, all reactions were carried out with dry, freshly distilled solvents under anhydrous conditions, in flame-dried, round bottom flasks with magnetic stirring. Solvent were dried according to established procedures. Yields refer to chromatographically and spectroscopically ( $^1\text{H}$  NMR) homogenous materials. All reactions were monitored by TLC unless otherwise stated. Column chromatography purifications were carried out using silica gel.  $^1\text{H}$  and  $^{13}\text{C}$  NMR spectral were recorded on 300 MHz and 75 MHz instruments. Data for  $^1\text{H}$  NMR are recorded as follows: chemical shift ( $\delta$ , ppm), multiplicity (s = singlet, d = doublet, t = triplet, m = multiplet or unresolved, coupling constant(s) in Hz, integration). Data for  $^{13}\text{C}$  NMR are reported in terms of chemical shift ( $\delta$ , ppm).

**General procedure for the synthesis of (Z)- $\gamma$ -hydroxy- $\alpha$ ,  $\beta$ -alkenoic Esters (Z)-1:**

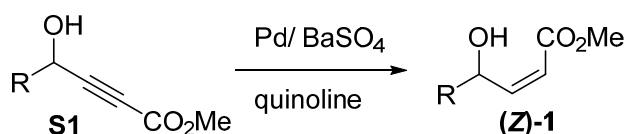

Lindlar Pd catalyst (5 wt% on  $\text{BaSO}_4$ , 10 mg) in combination with quinoline (10  $\mu\text{l}$ ) was added to the solution of  $\gamma$ -hydroxy- $\alpha$ ,  $\beta$ -acetylenic ester (2 mmol) in hexane or  $\text{Et}_2\text{O}$  (5 mL). The suspension was vigorously stirred under  $\text{H}_2$  (in balloon) for 2h until the reaction completed (monitored by  $^1\text{H}$  NMR). The catalyst was then removed by filtration through a small portion of Celite®, and washed with hexane. The hexane solution was concentrated in vacuo and used for the next step without purification. It was found that the residual quinoline did not affect on the subsequent allylic isomerization.

**General procedure for the synthesis of (E)- $\gamma$ -hydroxy- $\alpha$ ,  $\beta$ -alkenoic Esters (E)-1o:**

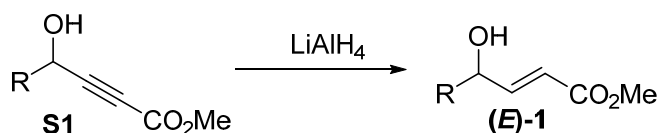

To a suspension of  $\text{LiAlH}_4$  (1 equiv) in dry THF or diethyl ether was added the  $\gamma$ -hydroxy- $\alpha$ ,  $\beta$ -acetylenic ester in THF (or ether) dropwise at  $0^\circ\text{C}$ , which was then allowed to stir at room temperature. After the starting material had disappeared (TLC, 2 h), the reaction was quenched with saturated ammonium chloride solution, diluted with ether, filtered over Celite® and the organic layer was dried over  $\text{Na}_2\text{SO}_4$ . The residue obtained after removal of the solvent was purified by column chromatography (PE / EA = 9:1 to 5:1) to furnish the desired (E)- $\gamma$ -hydroxy- $\alpha$ ,  $\beta$ -alkenoic esters (E)-1o as a colorless liquid.  $^1\text{H}$  NMR (300 MHz,  $\text{CDCl}_3$ )  $\delta$  7.44 – 7.27 (m, 5H), 7.05 (dd,  $J$  = 15.6, 4.8 Hz, 1H), 6.18 (dd,  $J$  = 15.6, 1.6 Hz, 1H), 5.36 (s, 1H), 3.73 (s, 3H), 2.26 (d,  $J$  = 3.0 Hz, 1H).  $^{13}\text{C}$  NMR (75 MHz,  $\text{CDCl}_3$ )  $\delta$  166.9, 148.8, 140.9, 128.9, 128.4, 126.6, 119.8, 73.5, 51.76. [1]

**General procedure for the allylic isomerization of 1 to  $\gamma$ -keto esters 2.** To a round-bottom flask was added  $\gamma$ -hydroxy- $\alpha$ ,  $\beta$ -alkenoic esters **1** (0.2 mmol), TMEDA (15  $\mu$ l, 0.1 mmol, 50 mol %) and Mg(OMe)<sub>2</sub> (0.134 mmol, 67 mol %) in 2 mL MeOH. After stirring at room temperature for 2 h, the resulting solution was concentrated under vacuum, The residue was purified by chromatography on silica gel (PE / EA = 9:1 to 7:1) to afford the  $\gamma$ -keto esters **2**.<sup>[21]</sup>

**Methyl 4-oxoundecanoate (2a):**<sup>[2a]</sup> 91% yield. <sup>1</sup>H NMR (300 MHz, CDCl<sub>3</sub>)  $\delta$  3.68 (s, 3H), 2.72 (t,  $J$  = 6.2 Hz, 2H), 2.58 (t,  $J$  = 9.6, 2H), 2.44 (t,  $J$  = 7.5 Hz, 2H), 1.70 – 1.51 (m, 2H), 1.36 – 1.18 (m, 8H), 0.88 (t,  $J$  = 6.7 Hz, 3H). <sup>13</sup>C NMR (75 MHz, CDCl<sub>3</sub>)  $\delta$  209.1, 173.3, 51.7, 42.8, 37.0, 31.6, 29.1, 29.0, 27.7, 23.8, 22.6, 14.0. EI-MS ( $m/z$ ): 214 (M<sup>+</sup>), 183 (M<sup>+</sup>-31), 143 (M<sup>+</sup>-71), 127(M<sup>+</sup>-87), 115 (M<sup>+</sup>-99), 57 (M<sup>+</sup>-157).

**Methyl 4-oxo-4-(*m*-tolyl)butanoate (2b):**<sup>[2c]</sup> 88% yield. <sup>1</sup>H NMR (300 MHz, CDCl<sub>3</sub>)  $\delta$  7.79 (dd,  $J$  = 6.6, 1.2 Hz, 2H), 7.41 – 7.30 (m, 2H), 3.71 (s, 3H), 3.31 (t,  $J$  = 6.7 Hz, 2H), 2.77 (t,  $J$  = 6.7 Hz, 2H), 2.41 (s, 3H). <sup>13</sup>C NMR (75 MHz, CDCl<sub>3</sub>)  $\delta$  198.2, 173.4, 138.3, 136.5, 133.9, 128.5, 128.4, 125.2, 51.8, 33.4, 28.0, 21.3. EI-MS ( $m/z$ ): 206 (M<sup>+</sup>), 175 (M<sup>+</sup>-31), 119 (M<sup>+</sup>-87), 91 (M<sup>+</sup>-115).

**Methyl 4-oxo-4-(*p*-tolyl)butanoate (2c):**<sup>[2b]</sup> 92% yield. <sup>1</sup>H NMR (300 MHz, CDCl<sub>3</sub>)  $\delta$  7.88 (d,  $J$  = 8.2 Hz, 1H), 7.26 (d,  $J$  = 7.9 Hz, 1H), 3.70 (s, 1H), 3.30 (t,  $J$  = 6.7 Hz, 1H), 2.76 (t,  $J$  = 6.7 Hz, 1H), 2.41 (s, 2H). <sup>13</sup>C NMR (75 MHz, CDCl<sub>3</sub>)  $\delta$  197.6, 173.4, 144.0, 134.0, 129.2, 128.1, 51.7, 33.2, 28.0, 21.6. EI-MS ( $m/z$ ): 206 (M<sup>+</sup>), 175 (M<sup>+</sup>-31), 119 (M<sup>+</sup>-87), 91 (M<sup>+</sup>-115).

**Methyl 4-(3-chlorophenyl)-4-oxobutanoate (2d):** 84% yield. <sup>1</sup>H NMR (300 MHz, CDCl<sub>3</sub>)  $\delta$  7.95 (s, 1H), 7.86 (d,  $J$  = 7.6 Hz, 1H), 7.55 (d,  $J$  = 7.9 Hz, 1H), 7.43 (q,  $J$  = 7.4 Hz, 1H), 3.71 (s, 3H), 3.29 (t,  $J$  = 6.6 Hz, 2H), 2.77 (t,  $J$  = 6.6 Hz, 2H). <sup>13</sup>C NMR (75 MHz, CDCl<sub>3</sub>)  $\delta$  196.8, 173.1, 138.1, 135.0, 133.1, 130.0, 128.2, 126.1, 51.9, 33.5, 27.9. HRMS (ESI)  $m/z$  calcd for C<sub>11</sub>H<sub>11</sub>ClO<sub>3</sub> [M + H]<sup>+</sup>: 227.0469, found  $m/z$  227.0472.

**Methyl 4-(4-chlorophenyl)-4-oxobutanoate (2e):**<sup>[2c]</sup> 94% yield. <sup>1</sup>H NMR (300 MHz, CDCl<sub>3</sub>)  $\delta$  7.98 – 7.87 (m, 2H), 7.48 – 7.39 (m, 2H), 3.71 (s, 3H), 3.29 (t,  $J$  = 6.6 Hz, 2H), 2.77 (t,  $J$  = 6.6 Hz, 2H). <sup>13</sup>C NMR (75 MHz, CDCl<sub>3</sub>)  $\delta$  197.6, 173.4, 144.0, 134.0, 129.2, 128.1, 51.8, 33.2, 28.0, 21.6. EI-MS ( $m/z$ ): 228 (M<sup>+</sup>), 226 (M<sup>+</sup>), 197 (M<sup>+</sup>-31), 195 (M<sup>+</sup>-31), 141 (M<sup>+</sup>-87), 139 (M<sup>+</sup>-87), 113 (M<sup>+</sup>-115), 111 (M<sup>+</sup>-115).

**Methyl 4-(2-chlorophenyl)-4-oxobutanoate (2f):**<sup>[2c]</sup> 79% yield. <sup>1</sup>H NMR (300 MHz, CDCl<sub>3</sub>)  $\delta$  7.59 – 7.53 (m, 1H), 7.46 – 7.38 (m, 2H), 7.38 – 7.30 (m, 1H), 3.71 (s, 3H), 3.27 (t,  $J$  = 6.6 Hz,

2H), 2.78 (t,  $J = 6.6$  Hz, 2H).  $^{13}\text{C}$  NMR (75 MHz,  $\text{CDCl}_3$ )  $\delta$  201.1, 173.0, 138.8, 131.9, 130.1, 130.6, 129.2, 126.9, 51.8, 37.6, 28.3. EI-MS ( $m/z$ ): 228 ( $\text{M}^+$ ), 226 ( $\text{M}^+$ ), 197 ( $\text{M}^+-31$ ), 195 ( $\text{M}^+-31$ ), 141 ( $\text{M}^+-87$ ), 139 ( $\text{M}^+-87$ ), 113 ( $\text{M}^+-115$ ), 111 ( $\text{M}^+-115$ ).

**Methyl 4-(naphthalen-2-yl)-4-oxobutanoate (2g):**  $^{[2c]}$  94% yield.  $^1\text{H}$  NMR (300 MHz,  $\text{CDCl}_3$ )  $\delta$  8.52 (s, 1H), 8.04 (dd,  $J = 8.6, 1.7$  Hz, 1H), 7.97 (d,  $J = 7.8$  Hz, 1H), 7.93 – 7.82 (m, 2H), 7.64 – 7.50 (m, 2H), 3.73 (s, 3H), 3.47 (t,  $J = 6.7$  Hz, 2H), 2.83 (t,  $J = 6.7$  Hz, 2H).  $^{13}\text{C}$  NMR (75 MHz,  $\text{CDCl}_3$ )  $\delta$  198.0, 173.4, 135.7, 133.9, 132.5, 129.8, 129.6, 128.5, 128.4, 127.8, 126.8, 123.7, 51.8, 33.5, 28.1. EI-MS ( $m/z$ ): 242 ( $\text{M}^+$ ), 211 ( $\text{M}^+-31$ ), 155 ( $\text{M}^+-87$ ), 127 ( $\text{M}^+-115$ ).

**Methyl 4-(4-methoxyphenyl)-4-oxobutanoate (2h):**  $^{[2c]}$  96% yield.  $^1\text{H}$  NMR (300 MHz,  $\text{CDCl}_3$ )  $\delta$  8.02 – 7.91 (m, 2H), 6.98 – 6.88 (m, 2H), 3.87 (s, 3H), 3.71 (s, 3H), 3.28 (t,  $J = 6.7$  Hz, 2H), 2.75 (t,  $J = 6.7$  Hz, 2H).  $^{13}\text{C}$  NMR (75 MHz,  $\text{CDCl}_3$ )  $\delta$  196.5, 173.5, 163.5, 130.3, 129.6, 113.7, 55.4, 51.8, 33.0, 28.1. EI-MS ( $m/z$ ): 222 ( $\text{M}^+$ ), 191 ( $\text{M}^+-31$ ), 135 ( $\text{M}^+-87$ ).

**Methyl 4-(2-methoxyphenyl)-4-oxobutanoate (2i):**  $^{[2c]}$  75% yield.  $^1\text{H}$  NMR (300 MHz,  $\text{CDCl}_3$ )  $\delta$  7.76 (dd,  $J = 7.7, 1.7$  Hz, 1H), 7.54 – 7.39 (m, 1H), 7.06 – 6.91 (m, 2H), 3.92 (s, 3H), 3.70 (s, 3H), 3.33 (t,  $J = 6.7$  Hz, 2H), 2.71 (t,  $J = 6.7$  Hz, 2H).  $^{13}\text{C}$  NMR (75 MHz,  $\text{CDCl}_3$ )  $\delta$  199.8, 173.6, 158.9, 133.7, 130.5, 127.4, 120.6, 111.5, 55.5, 51.7, 38.7, 28.5. EI-MS ( $m/z$ ): 222 ( $\text{M}^+$ ), 191 ( $\text{M}^+-31$ ), 135 ( $\text{M}^+-87$ ).

**Methyl 4-(furan-2-yl)-4-oxobutanoate (2j):**  $^{[2d]}$  92% yield.  $^1\text{H}$  NMR (300 MHz,  $\text{CDCl}_3$ )  $\delta$  7.59 (d,  $J = 1.0$  Hz, 1H), 7.23 (d,  $J = 3.5$  Hz, 1H), 6.55 (dd,  $J = 3.5, 1.7$  Hz, 1H), 3.70 (s, 3H), 3.18 (t,  $J = 6.8$  Hz, 2H), 2.75 (t,  $J = 6.8$  Hz, 2H).  $^{13}\text{C}$  NMR (75 MHz,  $\text{CDCl}_3$ )  $\delta$  187.2, 173.1, 152.4, 146.3, 117.0, 112.2, 51.8, 33.1, 27.6. EI-MS ( $m/z$ ): 182 ( $\text{M}^+$ ), 167 ( $\text{M}^+-15$ ), 151 ( $\text{M}^+-31$ ), 123 ( $\text{M}^+-59$ ), 95 ( $\text{M}^+-87$ ).

**(E)-Methyl 4-oxo-6-phenylhex-5-enoate (2k):**  $^{[2e]}$  95% yield.  $^1\text{H}$  NMR (300 MHz,  $\text{CDCl}_3$ )  $\delta$  7.59 (d,  $J = 16.4$  Hz, 1H), 7.56 – 7.52 (m, 2H), 7.39 (dd,  $J = 4.0, 2.4$  Hz, 3H), 6.76 (d,  $J = 16.2$  Hz, 1H), 3.70 (s, 3H), 3.02 (t,  $J = 6.7$  Hz, 2H), 2.70 (t,  $J = 6.7$  Hz, 2H).  $^{13}\text{C}$  NMR (75 MHz,  $\text{CDCl}_3$ )  $\delta$  197.9, 173.2, 142.8, 134.3, 130.5, 128.9, 128.2, 125.7, 51.7, 35.1, 27.8. EI-MS ( $m/z$ ): 218 ( $\text{M}^+$ ), 187 ( $\text{M}^+-31$ ), 159 ( $\text{M}^+-59$ ), 131 ( $\text{M}^+-87$ ), 103 ( $\text{M}^+-115$ ), 77 ( $\text{M}^+-141$ ).

**Methyl 4-cyclohexyl-4-oxobutanoate (2l):**  $^{[2f]}$  80% yield.  $^1\text{H}$  NMR (300 MHz,  $\text{CDCl}_3$ )  $\delta$  3.67 (s, 3H), 2.76 (t,  $J = 6.6$  Hz, 2H), 2.58 (t,  $J = 6.4$  Hz, 2H), 2.38 (tt,  $J = 11.3, 3.4$  Hz, 1H), 1.94 – 1.60 (m, 6H), 1.45 – 1.11 (m, 6H).  $^{13}\text{C}$  NMR (75 MHz,  $\text{CDCl}_3$ )  $\delta$  212.0, 173.4, 51.7, 50.7, 34.9, 28.4, 27.6, 25.8, 25.6. EI-MS ( $m/z$ ): 198 ( $\text{M}^+$ ), 167 ( $\text{M}^+-31$ ), 115 ( $\text{M}^+-83$ ), 111 ( $\text{M}^+-87$ ), 83 ( $\text{M}^+-115$ ).

**Methyl 4-oxodecanoate (2m):** <sup>[2f]</sup> 78% yield. <sup>1</sup>H NMR (300 MHz, CDCl<sub>3</sub>) δ 3.68 (s, 3H), 2.73 (t, *J* = 6.4 Hz, 2H), 2.59 (t, *J* = 6.2 Hz, 2H), 2.45 (t, *J* = 7.5 Hz, 2H), 1.57 (q, *J* = 6.9 Hz, 2H), 1.35 – 1.22 (m, 6H), 0.88 (t, *J* = 6.6 Hz, 3H). <sup>13</sup>C NMR (75 MHz, CDCl<sub>3</sub>) δ 209.1, 173.3, 51.6, 42.8, 37.0, 31.6, 28.9, 27.7, 23.8, 22.5, 14.0. EI-MS (*m/z*): 200 (M<sup>+</sup>), 169 (M<sup>+</sup>-31), 143 (M<sup>+</sup>-57), 115 (M<sup>+</sup>-85), 43 (M<sup>+</sup>-157).

**Methyl 4-oxooctanoate (2n):** <sup>[2g]</sup> 66% yield. <sup>1</sup>H NMR (300 MHz, CDCl<sub>3</sub>) δ 3.68 (s, 3H), 2.73 (t, *J* = 6.4 Hz, 2H), 2.58 (t, *J* = 9.6, 3.6 Hz, 2H), 2.45 (t, *J* = 7.5 Hz, 2H), 1.58 (dt, *J* = 15.3, 7.4 Hz, 2H), 1.32 (td, *J* = 14.8, 7.3 Hz, 2H), 0.91 (t, *J* = 7.3 Hz, 3H). <sup>13</sup>C NMR (75 MHz, CDCl<sub>3</sub>) δ 209.1, 173.3, 51.7, 42.4, 36.9, 27.7, 25.8, 22.2, 13.8. EI-MS (*m/z*): 172 (M<sup>+</sup>), 141 (M<sup>+</sup>-31), 115 (M<sup>+</sup>-57), 85 (M<sup>+</sup>-87), 57 (M<sup>+</sup>-115).

**Methyl 4-oxo-4-phenylbutanoate (2o):** <sup>[2a]</sup> 91% yield. <sup>1</sup>H NMR (300 MHz, CDCl<sub>3</sub>) δ 8.06 – 7.92 (m, 2H), 7.62 – 7.53 (m, 1H), 7.53 – 7.40 (m, 2H), 3.71 (s, 3H), 3.33 (t, *J* = 6.6 Hz, 2H), 2.78 (t, *J* = 6.6 Hz, 2H). <sup>13</sup>C NMR (75 MHz, CDCl<sub>3</sub>) δ 198.0, 173.3, 136.5, 133.2, 128.6, 128.0, 51.8, 33.4, 28.0. EI-MS (*m/z*): 192 (M<sup>+</sup>), 161 (M<sup>+</sup>-31), 105 (M<sup>+</sup>-87), 77 (M<sup>+</sup>-115).

### Deuteration Experiment:

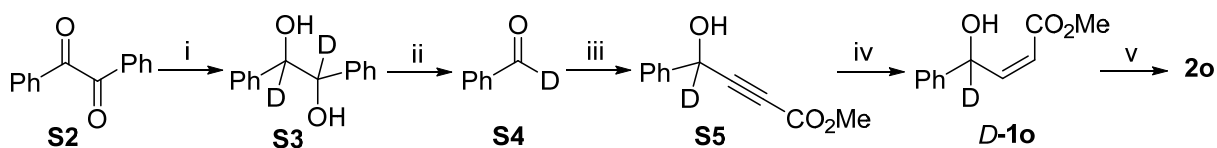

**Reduction of Benzil (S2):** Following the similar procedure in literature with minor modification:<sup>[3a-b]</sup> firstly the Benzil (**S2**, 1.05g, 5 mmol) was dissolved in a mixture solvent, which containing dried THF (10 mL) and D<sub>2</sub>O (0.5 mL). At 0°C, NaBD<sub>4</sub> (250 mg, 6.2 mmol, >98% D isotopic purity) was added in portion-wise over one hour. The mixture was stirred until No **S2** left, monitored via TLC. After general workup, the reaction mixture was extracted with EtOAc, dried over Na<sub>2</sub>SO<sub>4</sub>, filtered and concentrated to give the product **S3** as a white solid in nearly quantity yield, which was pure enough for the next step. <sup>1</sup>H NMR (300 MHz, CDCl<sub>3</sub>) δ 7.31 – 7.26 (m, 6H), 7.24 – 7.19 (m, 4H), 2.95 (s, 1H, *dl*), 2.30 (s, 1H, *Meso*). <sup>13</sup>C NMR (75 MHz, CDCl<sub>3</sub>) δ 139.6, 128.2, 128.1, 128.0, 127.9, 127.0, 126.9.

**Synthesis of Deuteriobenzaldehyde S4:**<sup>[3b]</sup> The diol **S3** was oxidized with NaIO<sub>4</sub> in ethanol overnight at room temperature. After the reaction was complete (monitored by TLC), the mixture was treated with general workup. Deuteriobenzaldehyde **S4** was purified over silica gel.

**Synthesis of  $\gamma$ -hydroxy- $\alpha$ ,  $\beta$ -acetylenic ester S5:** Alkynylation of deuteriobenzaldehyde **S4** via treatment with *n*-BuLi in THF at -78°C afforded **S5** in 70% yield. 91% yield. <sup>1</sup>H NMR (300 MHz, CDCl<sub>3</sub>) δ 7.50 – 7.46 (m, 2H), 7.41 – 7.32 (m, 3H), 3.76 (s, 3H), 3.62 (s, 1H). <sup>13</sup>C NMR (75 MHz, CDCl<sub>3</sub>) δ 153.8, 138.4, 128.7, 128.6, 126.5, 86.8, 77.2, 63.9, 63.6, 63.3, 52.8.

Lindlar reduction of **S5** was carried following the general procedure for the synthesis of (*Z*)- $\gamma$ -hydroxy- $\alpha$ ,  $\beta$ -alkenoic Esters (**Z**)-**1**. Without using quinolone, Pd catalyst was filtrated off until the hydrogenation complete (monitored via <sup>1</sup>H NMR). The organic solvent was evaporated under vacuum to afford **D-1o** which was used directly in the isomerization step. <sup>1</sup>H NMR (300 MHz, CDCl<sub>3</sub>) δ 7.49 – 7.45 (m, 2H), 7.39 – 7.26 (m, 3H), 6.45 (d, *J* = 12 Hz, 1H), 5.89 (d, *J* = 12 Hz, 1H), 3.77 (s, 3H).

Under standard condition as in the general procedure for the allylic isomerization of **1** to  $\gamma$ -keto esters **2**, the allylic isomerization was carried out, and only afforded compound **2o**. No deuterated product was observed.

### Synthesis of Methyl $\gamma$ -Methoxy- $\gamma$ -phenylbutenate **7**:

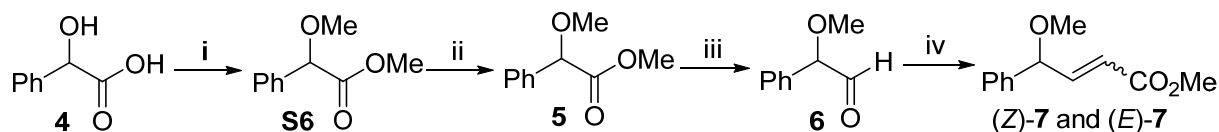

The suspension of (3.04g, 20 mmol) of the Mandelic acid (**4**) in 25mL of methanol was cooled down to 0 °C, 6mL of thionyl chloride was slowly dropped in. It was refluxed for 2h and then stirred for 8h at room temperature. The solvent was concentrated in vacuo and dried on air to give **S6** as a white solid (quantitative).  $^1\text{H NMR}$  (300 MHz,  $\text{CDCl}_3$ )  $\delta$ 7.33-7.44 (m, 5H), 5.19 (s, 3H), 3.77 (s, 3H).<sup>[4a]</sup>

Sodium hydride (240 mg, 6mmol) was suspended in THF (5 mL) and cooled to 0 C, to which the solution of methyl mandelate **S6** (0.5 mg, 5mol) in THF (2 mL) was added dropwise. After stirring for 0.5h, methyl iodide (0.8 g, 6 mmol) was added and the reaction mixture was warmed to room temperature. To the reaction mixture was quenched by  $\text{NH}_4\text{Cl}$  solution (10mL) after 4h. The resulting mixture was extracted with diethyl ether (50mL) twice. The combined organic layer was washed with brine (5mL), dried over  $\text{Mg}_2\text{SO}_4$ , and concentrated in vacuo. The crude product was purified by flash chromatography on silica gel to give **5** colorless oil (51% yield).  $^1\text{H NMR}$  (300 MHz,  $\text{CDCl}_3$ )  $\delta$ 7.26-7.42 (m, 5H), 4.78 (s, 1H), 3.73 (s, 3H), 3.41 (s, 3H).<sup>[4b]</sup>

To the solution of **5** (0.4 g, 2mmol) in  $\text{Et}_2\text{O}$  (10mL) at -78 °C, 1M DIBAL-H solution in hexane (2 mL) was added dropwise and the reaction mixture was allowed to stir at -78 °C for 2h. The reaction was quenched with MeOH (0.6 mL) and allowed to warm to room temperature. The mixture was treated with brine (10 mL) and extracted with  $\text{Et}_2\text{O}$  (50 mL X 3). The combined organic phase was washed with brine (10 mL) and dried over  $\text{Na}_2\text{SO}_4$ . The crude aldehyde was obtained after filtration and concentration in vacuo and was used for the next step without further purification.

Solution of methyl triphenylphosphine acetate (0.67 g, 2mmol) in MeOH (5 mL) was added to the above obtained aldehyde and stirred at 0°C overnight. After the addition of water (10mL), the product was extracted with  $\text{Et}_2\text{O}$ , dried over  $\text{Na}_2\text{SO}_4$  and purified by flash chromatography on gel (PE / EA = 25:1) to give **(Z)-7** and **(E)-7** as colorless oil. **(Z)-7**: 58% yield.  $^1\text{H NMR}$  (300 MHz,  $\text{CDCl}_3$ )  $\delta$  7.51 – 7.40 (m, 2H), 7.40 – 7.19 (m, 3H), 6.30 (dd,  $J$  = 11.6, 8.8 Hz, 1H), 5.98 (d,  $J$  = 8.9 Hz, 1H), 5.85 (dd,  $J$  = 11.6, 1.0 Hz, 1H), 3.72 (s, 3H), 3.32 (s, 3H).  $^{13}\text{C NMR}$  (75 MHz,  $\text{CDCl}_3$ )  $\delta$  166.1, 149.0, 140.1, 128.4, 127.8, 126.7, 119.3, 76.6, 56.2, 51.2. **(E)-7**: 29% yield.  $^1\text{H NMR}$  (300 MHz,  $\text{CDCl}_3$ )  $\delta$  7.44 – 7.18 (m, 5H), 6.97 (dd,  $J$  = 15.7, 5.4 Hz, 1H), 6.10 (dd,  $J$  = 15.7, 1.5 Hz, 1H), 4.78 (dd,  $J$  = 5.4, 1.2 Hz, 1H), 3.71 (s, 3H), 3.32 (s, 3H).  $^{13}\text{C NMR}$  (75 MHz,  $\text{CDCl}_3$ )  $\delta$  166.6, 147.5, 138.8, 128.6, 128.2, 128.3, 120.3, 82.3, 56.6, 51.5.<sup>[4c]</sup>

### Synthesis of (*E*)- $\alpha$ -alkenyl- $\gamma$ -butyrolactone.

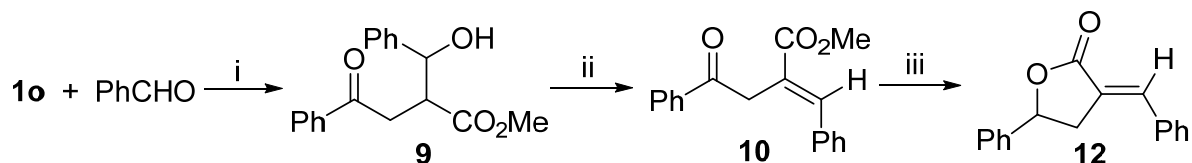

**Tandem allylic isomerization-Aldol reaction to 9.** To a round-bottom flask was added  $\text{Mg}(\text{OMe})_2$  (5 mL, 1.34 mmol, 67 mol %), TMEDA (150  $\mu\text{l}$ , 1 mmol, 50 mol %), benzaldehyde (2 mmol) and  $\gamma$ -hydroxy- $\alpha$ ,  $\beta$ -alkenoic esters **1o** (2 mmol). After stirring at room temperature overnight, the mixture was quenched by addition of 1N HCl solution, extracted with ethyl acetate, and washed with brine. The combined organic phase was dried over sodium sulfate and concentrated under vacuum. The crude product was purified by flash chromatography on silica gel (PE / EA = 12:1) to give **9** as a white solid, 89 % yield.  $^1\text{H}$  NMR (300 MHz,  $\text{CDCl}_3$ )  $\delta$  7.89 – 7.81 (m, 2H), 7.59 – 7.50 (m, 1H), 7.47 – 7.38 (m, 3H), 7.38 – 7.32 (m, 5H), 7.32 – 7.26 (m, 1H), 5.01 (d,  $J$  = 7.1 Hz, 1H), 3.69 (s, 3H), 3.49 – 3.40 (m, 1H), 3.40 – 3.23 (m, 2H), 3.11 (dd,  $J$  = 17.7, 4.5 Hz, 1H).  $^{13}\text{C}$  NMR (75 MHz,  $\text{CDCl}_3$ )  $\delta$  197.6, 174.7, 141.2, 136.3, 133.4, 128.64, 128.58, 128.2, 128.0, 126.3, 74.5, 52.2, 47.9, 37.8. ESI-MS ( $\text{M-OH}$ ) $^+$ : 281. <sup>[5a]</sup>

**Dehydration of Reformatsky-like adduct 9 to 10.** To a solution of **9** (107 mg, 0.5 mmol) in  $\text{CH}_2\text{Cl}_2$  (5 mL) at room temperature (1.1ml, 30 equ.) was added TFA in dropwise. The reaction mixture was stirred overnight and then quenched with  $\text{NaHCO}_3$  (sat. solution), extracted with ethyl acetate, washed with brine, dried over  $\text{Na}_2\text{SO}_4$  and concentrated in vacuum. The crude product was purified by flash chromatography on silica gel (PE / EA = 30:1) to give **10** as pale yellow oil, 98 % yield based on the recovered starting material (32%).  $^1\text{H}$  NMR (300 MHz,  $\text{CDCl}_3$ )  $\delta$  8.09 – 7.94 (m, 3H), 7.64 – 7.54 (m, 1H), 7.54 – 7.43 (m, 2H), 7.36 – 7.27 (m, 5H), 4.21 (s, 2H), 3.79 (s, 3H).  $^{13}\text{C}$  NMR (75 MHz,  $\text{CDCl}_3$ )  $\delta$  197.3, 167.9, 142.3, 136.6, 135.2, 133.3, 128.7, 128.64, 128.60, 128.3, 127.0, 52.2, 38.1, 29.7. EI-MS ( $m/z$ ): 280 ( $\text{M}^+$ ), 249 ( $\text{M}^+ - 31$ ), 105 ( $\text{M}^+ - 175$ ), 77 ( $\text{M}^+ - 203$ ). <sup>[5b]</sup>

**Synthesis of (*E*)- $\alpha$ -benzylidene- $\gamma$ -phenyl butyrolactone **12**.** <sup>[6]</sup> After dissolving **10** (64 mg, 0.3mmol) in 5 ml of MeOH,  $\text{NaBH}_4$  (34.2 mg, 3 equiv) was added to the stirred solution in small portions at 0°C. While the reduction completed (monitored by TLC, 0.5 h), 1 ml 1N HCl was then added to quench the reaction. The mixture was stirred for another half hour, extracted with EtOAc (5 ml  $\times$  3) and washed with brine, then dried over  $\text{Na}_2\text{SO}_4$  and concentrated in vacuum. The crude product was purified by flash chromatography on silica gel (PE / EA = 30:1) to give afford **7** as a white solid, 70% yield.  $^1\text{H}$  NMR (300 MHz,  $\text{CDCl}_3$ )  $\delta$  7.64 (t,  $J$  = 2.9 Hz,



1H), 7.52 – 7.46 (m, 2H), 7.46 – 7.38 (m, 4H), 7.38 – 7.35 (m, 3H), 7.35 – 7.33 (m, 1H), 5.61 (dd,  $J = 8.3, 6.0$  Hz, 1H), 3.70 (ddd,  $J = 17.5, 8.3, 2.7$  Hz, 1H), 3.16 (ddd,  $J = 17.5, 5.9, 3.0$  Hz, 1H).  $^{13}\text{C}$  NMR (75 MHz,  $\text{CDCl}_3$ )  $\delta$  171.9, 140.2, 136.9, 134.5, 130.0, 129.9, 128.9, 128.8, 128.5, 125.3, 124.0, 78.1, 36.5. HRMS (ESI)  $m/z$  calcd for  $\text{C}_{17}\text{H}_{14}\text{O}_2$   $[\text{M} + \text{H}]^+$ : 251.1067, found  $m/z$  251.1071. <sup>[5c]</sup>

---

[1] K. Burgess, J. Cassidy and I. Henderson, *J. Org. Chem.* 1991, **56**, 2050.

[2] (a) O. G. Kulinkovich and V. L. Sorokin, *Synthesis* 1994, **4**, 361. (b) E. A. Jo and C. H. Jun, *Eur. J. Org. Chem.* 2006, 2504. (c) W. G. Dauben and H. Tilles, *J. Org. Chem.* 1950, **15**, 785. (d) Y. J. Liu and Y. M. Zhang, *Tetrahedron* 2003, **59**, 8429. (e) J. C. del Amo, M. J. Mancheno, M. Gomez-Gallego and M. A. Sierra, *Organometallics* 2004, **23**, 5021. (f) I. Ryu, K. Kusano, H. Yamazaki and N. Sonoda, *J. Org. Chem.* 1991, **56**, 5003. (g) H. Cherkaoui, M. Soufiaoui and R. Grée, *Tetrahedron* 2001, **57**, 2379. (h) K. Miura, N. Fujisawa, H. Saito, D. Wang and A. Hosomi, *Org. Lett.* 2001, **3**, 2591.

[3] (a) B. W. Day and S. S. Jonnalagadda, *J. Labelled Comp. Radiopharm.*, 1995, **36**, 73. (b) Sk. A. Ali, S. M. A. Hashmi, M. N. Siddiqui and M. I. M. Wazeer, *Tetrahedron*, 1996, **52**, 14917.

[4] (a) M. Selva and P. Tundo, *J. Org. Chem.* 2006, **71**, 1464. (b) K. Ogura, J. Watanabe, K. Takahashi and H. Iida, *J. Org. Chem.* 1982, **47**, 5404. (c) Y. Sevryugina, B. Weaver, J. Hansen, J. Thompson, H. M. L. Davies and M. A. Petrukhina, *Organometallics* 2008, **27**, 1750.

[5] (a) W. Eberbach and B. Burchardt, *Chem. Ber.* 1978, **111**, 3665. (b) G. S. Reddy, P. Neelakantan and D. S. Iyengar, *Indian J. Chem. Sect. B* 2000, **9B(12)**, 894. (c) K.-W. Liang, W.-T. Li, S.-M. Peng, S.-L. Wang and R.-S. Liu, *J. Am. Chem. Soc.* 1997, **119**, 4404.

[6] Un-optimized conditions.

```

NAME          USU7U6TAN
EXPNO         9
PROCNO        1
Date_         20090709
Time         20.52
INSTRUM       spect
PROBHD        5 mm PABBO BB-
PULPROG       zg30
TD            65536
SOLVENT       CDCl3
NS            8
DS            2
SWH           6188.119 Hz
FIDRES        0.094423 Hz
AQ            5.2953587 sec
RG            57
DW            80.800 usec
DE            6.50 usec
TE            294.1 K
D1            1.00000000 sec
TD0           1
===== CHANNEL f1 =====
NUC1          1H
P1            11.80 usec
PL1           0.00 dB
PL1W         11.55467796 W
SF01         300.1318534 MHz
SI           32768
SF           300.1299983 MHz
WDW           EM
SSB           0
LB           0.30 Hz
GB           0
PC           1.00

```

0.000

0.853  
0.876  
0.898

1.274

1.539  
1.563  
1.586  
1.610  
1.634  
1.657

2.745  
2.724  
2.704  
2.606  
2.585  
2.564  
2.562  
2.469  
2.445  
2.420

3.676

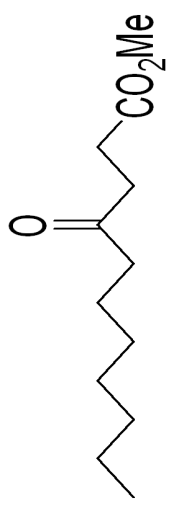

2a

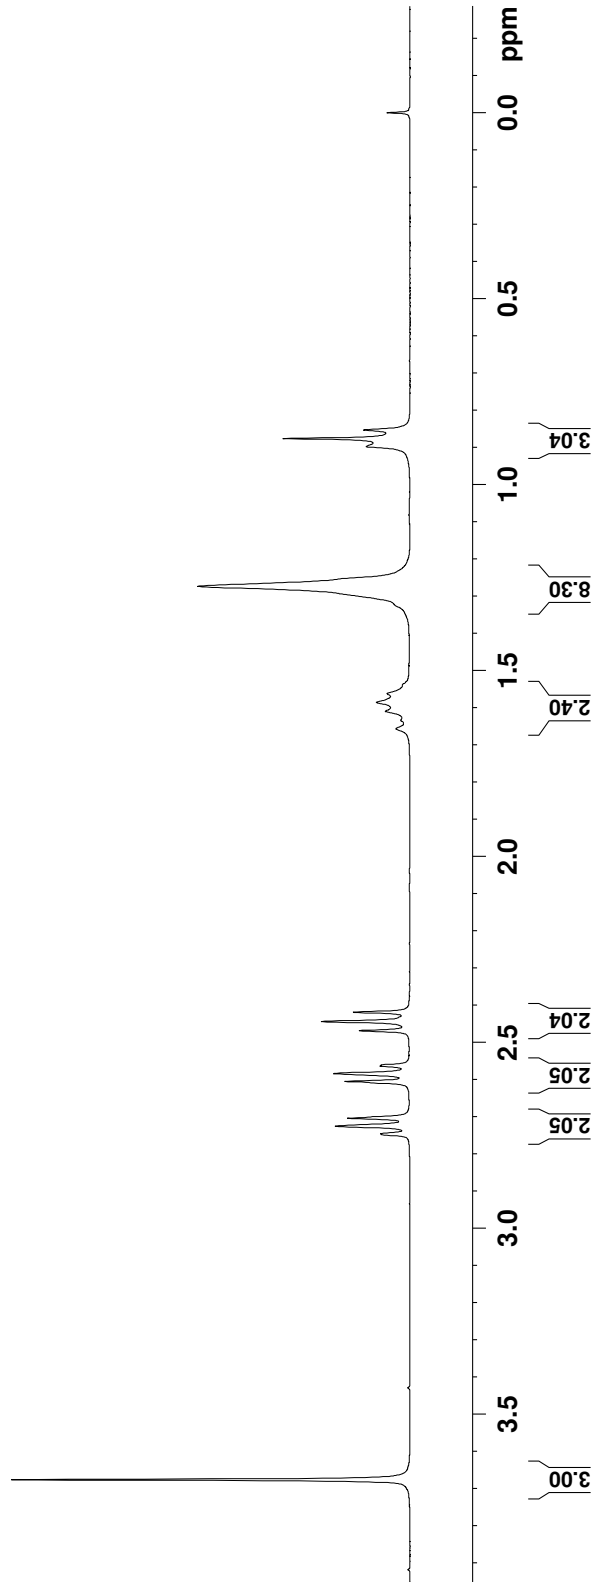



NAME\_1 F4MNF11274  
 EXPNO 1  
 PROCNO 1  
 Date\_ 20091124  
 Time 11.34  
 INSTRUM spect  
 PROBHD 5 mm PABBO BB-  
 PULPROG zg30  
 TD 65536  
 SOLVENT CDCl3  
 NS 8  
 DS 2  
 SWH 6188.119 Hz  
 FIDRES 0.094423 Hz  
 AQ 5.2953587 sec  
 RG 45.2  
 DW 80.800 usec  
 DE 6.50 usec  
 TE 289.1 K  
 D1 1.00000000 sec  
 TD0 1

===== CHANNEL f1 =====  
 NUC1 1H  
 P1 11.80 usec  
 PL1 0.00 dB  
 PL1W 11.55467796 W  
 SF01 300.1318534 MHz  
 SI 32768  
 SF 300.1299991 MHz  
 WDW EM  
 SSB 0  
 LB 0.30 Hz  
 GB 0  
 PC 1.00

2.412  
 2.743  
 2.765  
 2.787  
 3.292  
 3.314  
 3.337  
 3.708

7.270  
 7.324  
 7.326  
 7.349  
 7.370  
 7.375  
 7.395  
 7.401  
 7.772  
 7.777  
 7.795  
 7.798

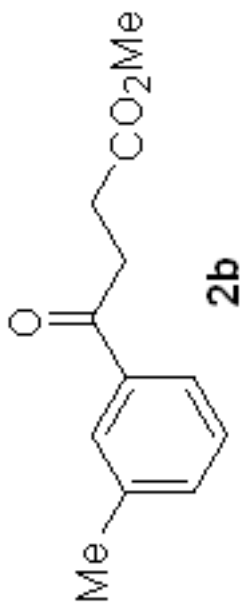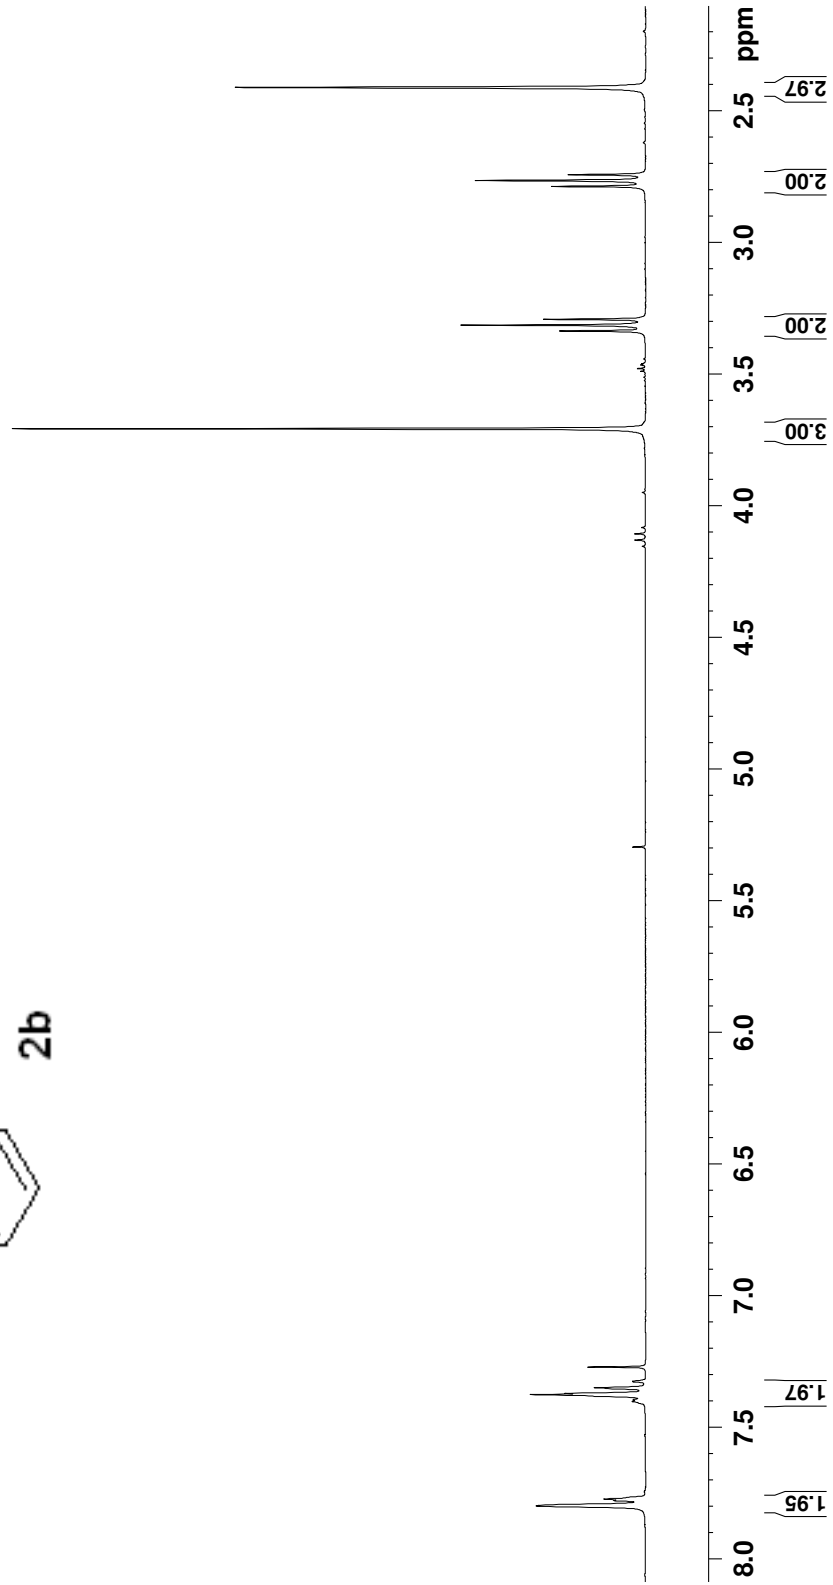

```

NAME          LAN091124
EXPNO         5
PROCNO        1
Date_         20091124
Time_         15.12
INSTRUM       spect
PROBHD        5 mm PABBO BB-
PULPROG       zgpg30
TD            65536
SOLVENT       CDCl3
NS            143
DS            4
SWH           18028.846 Hz
FIDRES       0.275098 Hz
AQ           1.8175818 sec
RG           203
DW           27.733 usec
DE           6.50 usec
TE           290.5 K
D1           2.0000000 sec
D11          0.0300000 sec
TD0          1
  
```

```

===== CHANNEL f1 =====
NUC1          13C
P1            9.70 usec
PL1           0.00 dB
PILW         29.38907051 W
SFO1         75.4752953 MHz

===== CHANNEL f2 =====
CPDPRG2       waitz16
NUC2          1H
PCPD2        80.00 usec
PL2           1.00 dB
PIL2         17.00 dB
PL13         17.00 dB
PIL3         17.00 dB
PIL2W        9.17820644 W
PIL2M        0.23854613 W
PIL13W       0.23854613 W
SFO2         300.1312005 MHz
SI           32768
SF           75.4677490 MHz
WDW           EM
SSB           0
LB           1.00 Hz
GB           0
PC           1.40
  
```

21.34  
28.03  
33.43  
51.82  
76.62  
77.05  
77.47

125.24  
128.48  
128.56  
133.99  
136.52  
138.39

173.42  
198.24

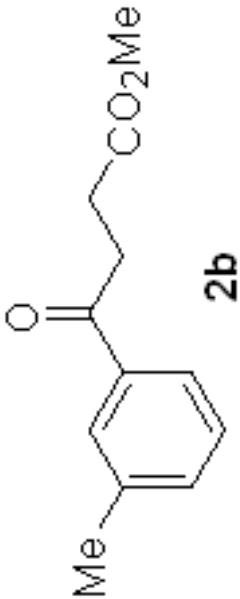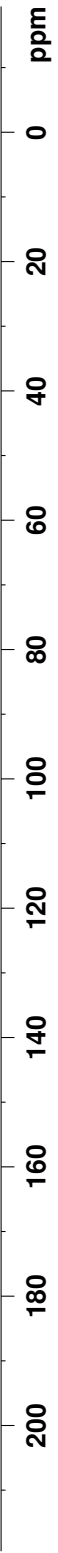

NAME 0907231an  
 EXPNO 7  
 PROCNO 1  
 Date\_ 20090723  
 Time 15.36  
 INSTRUM spect  
 PROBD 5 mm PABBO BB-  
 PULPROG zg30  
 ID 65536  
 SOLVENT CDCl3  
 NS 8  
 DS 2  
 SWH 6188.119 Hz  
 FIDRES 0.094423 Hz  
 AQ 5.2953587 sec  
 RG 57  
 DW 80.800 usec  
 DE 6.50 usec  
 TE 293.7 K  
 D1 1.00000000 sec  
 TD0 1

===== CHANNEL f1 =====  
 NUC1 1H  
 P1 11.80 usec  
 PL1 0.00 dB  
 PL1W 11.55467796 W  
 SF01 300.1318534 MHz  
 SI 32768  
 SF 300.1299992 MHz  
 WDW EM  
 SSB 0  
 LB 0.30 Hz  
 GB 0  
 PC 1.00

0.000  
 2.409  
 2.735  
 2.757  
 2.779  
 3.275  
 3.297  
 3.320  
 3.704

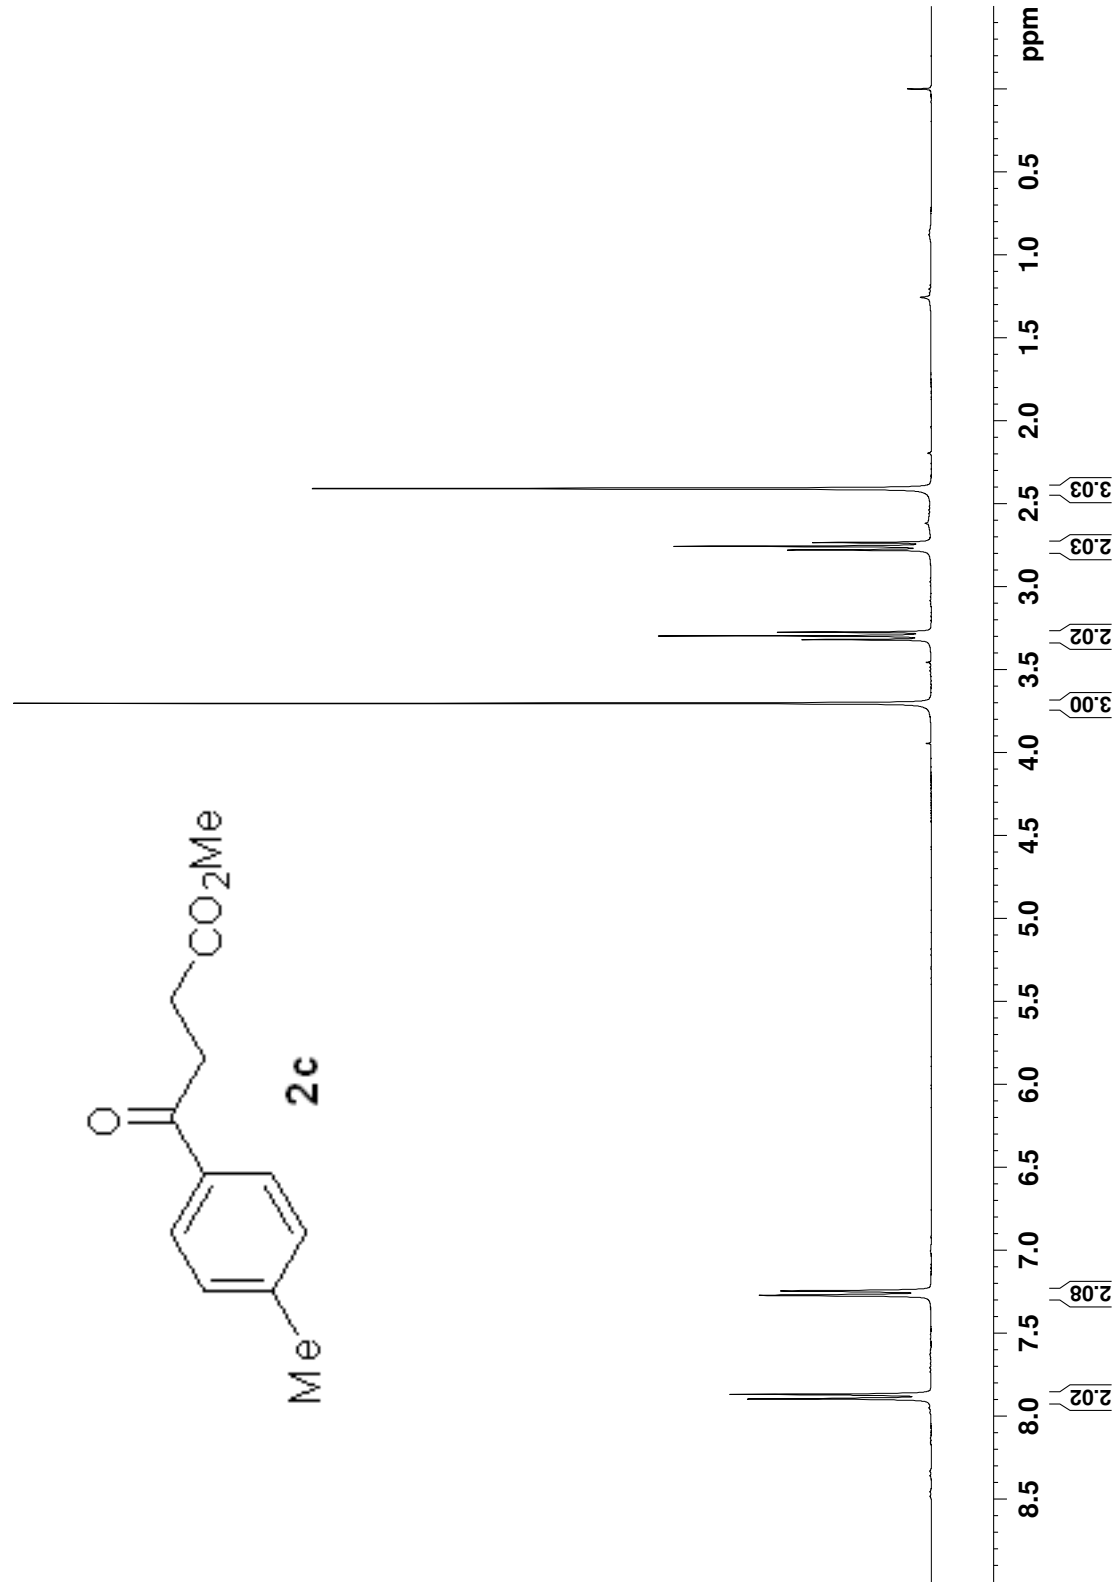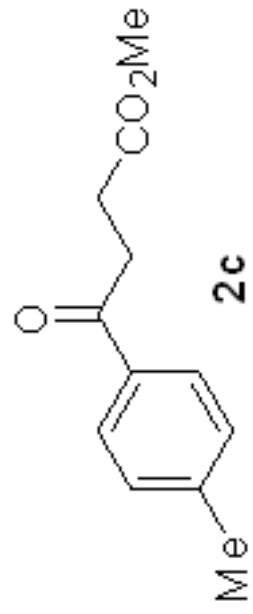

```

NAME      0907231an
EXPNO    8
PROCNO   1
Date_    20090723
Time     16.03
INSTRUM  spect
PROBHD   5 mm PABBO BB-
PULPROG  zgpg30
TD        65536
SOLVENT  CDCl3
NS        390
DS        4
SWH       18028.846 Hz
FIDRES   0.275098 Hz
AQ        1.8175818 sec
RG        203
DW        27.733 usec
DE        6.50 usec
TE        294.6 K
D1        2.0000000 sec
D11       0.0300000 sec
TD0       1

===== CHANNEL f1 =====
NUC1      13C
P1        9.70 usec
PL1       0.00 dB
PL1W      29.38907051 W
SFO1      75.4752953 MHz

===== CHANNEL f2 =====
CPDPRG2   waitz16
NUC2       1H
PCPD2     80.00 usec
PL2        1.00 dB
PL2W      17.00 dB
PL12      17.00 dB
PL13      17.00 dB
PL14      17.00 dB
PL15      17.00 dB
PL16      17.00 dB
PL17      17.00 dB
PL18      17.00 dB
PL19      17.00 dB
PL20      17.00 dB
PL21      17.00 dB
PL22      17.00 dB
PL23      17.00 dB
PL24      17.00 dB
PL25      17.00 dB
PL26      17.00 dB
PL27      17.00 dB
PL28      17.00 dB
PL29      17.00 dB
PL30      17.00 dB
PL31      17.00 dB
PL32      17.00 dB
PL33      17.00 dB
PL34      17.00 dB
PL35      17.00 dB
PL36      17.00 dB
PL37      17.00 dB
PL38      17.00 dB
PL39      17.00 dB
PL40      17.00 dB
PL41      17.00 dB
PL42      17.00 dB
PL43      17.00 dB
PL44      17.00 dB
PL45      17.00 dB
PL46      17.00 dB
PL47      17.00 dB
PL48      17.00 dB
PL49      17.00 dB
PL50      17.00 dB
PL51      17.00 dB
PL52      17.00 dB
PL53      17.00 dB
PL54      17.00 dB
PL55      17.00 dB
PL56      17.00 dB
PL57      17.00 dB
PL58      17.00 dB
PL59      17.00 dB
PL60      17.00 dB
PL61      17.00 dB
PL62      17.00 dB
PL63      17.00 dB
PL64      17.00 dB
PL65      17.00 dB
PL66      17.00 dB
PL67      17.00 dB
PL68      17.00 dB
PL69      17.00 dB
PL70      17.00 dB
PL71      17.00 dB
PL72      17.00 dB
PL73      17.00 dB
PL74      17.00 dB
PL75      17.00 dB
PL76      17.00 dB
PL77      17.00 dB
PL78      17.00 dB
PL79      17.00 dB
PL80      17.00 dB
PL81      17.00 dB
PL82      17.00 dB
PL83      17.00 dB
PL84      17.00 dB
PL85      17.00 dB
PL86      17.00 dB
PL87      17.00 dB
PL88      17.00 dB
PL89      17.00 dB
PL90      17.00 dB
PL91      17.00 dB
PL92      17.00 dB
PL93      17.00 dB
PL94      17.00 dB
PL95      17.00 dB
PL96      17.00 dB
PL97      17.00 dB
PL98      17.00 dB
PL99      17.00 dB
PL100     17.00 dB

```

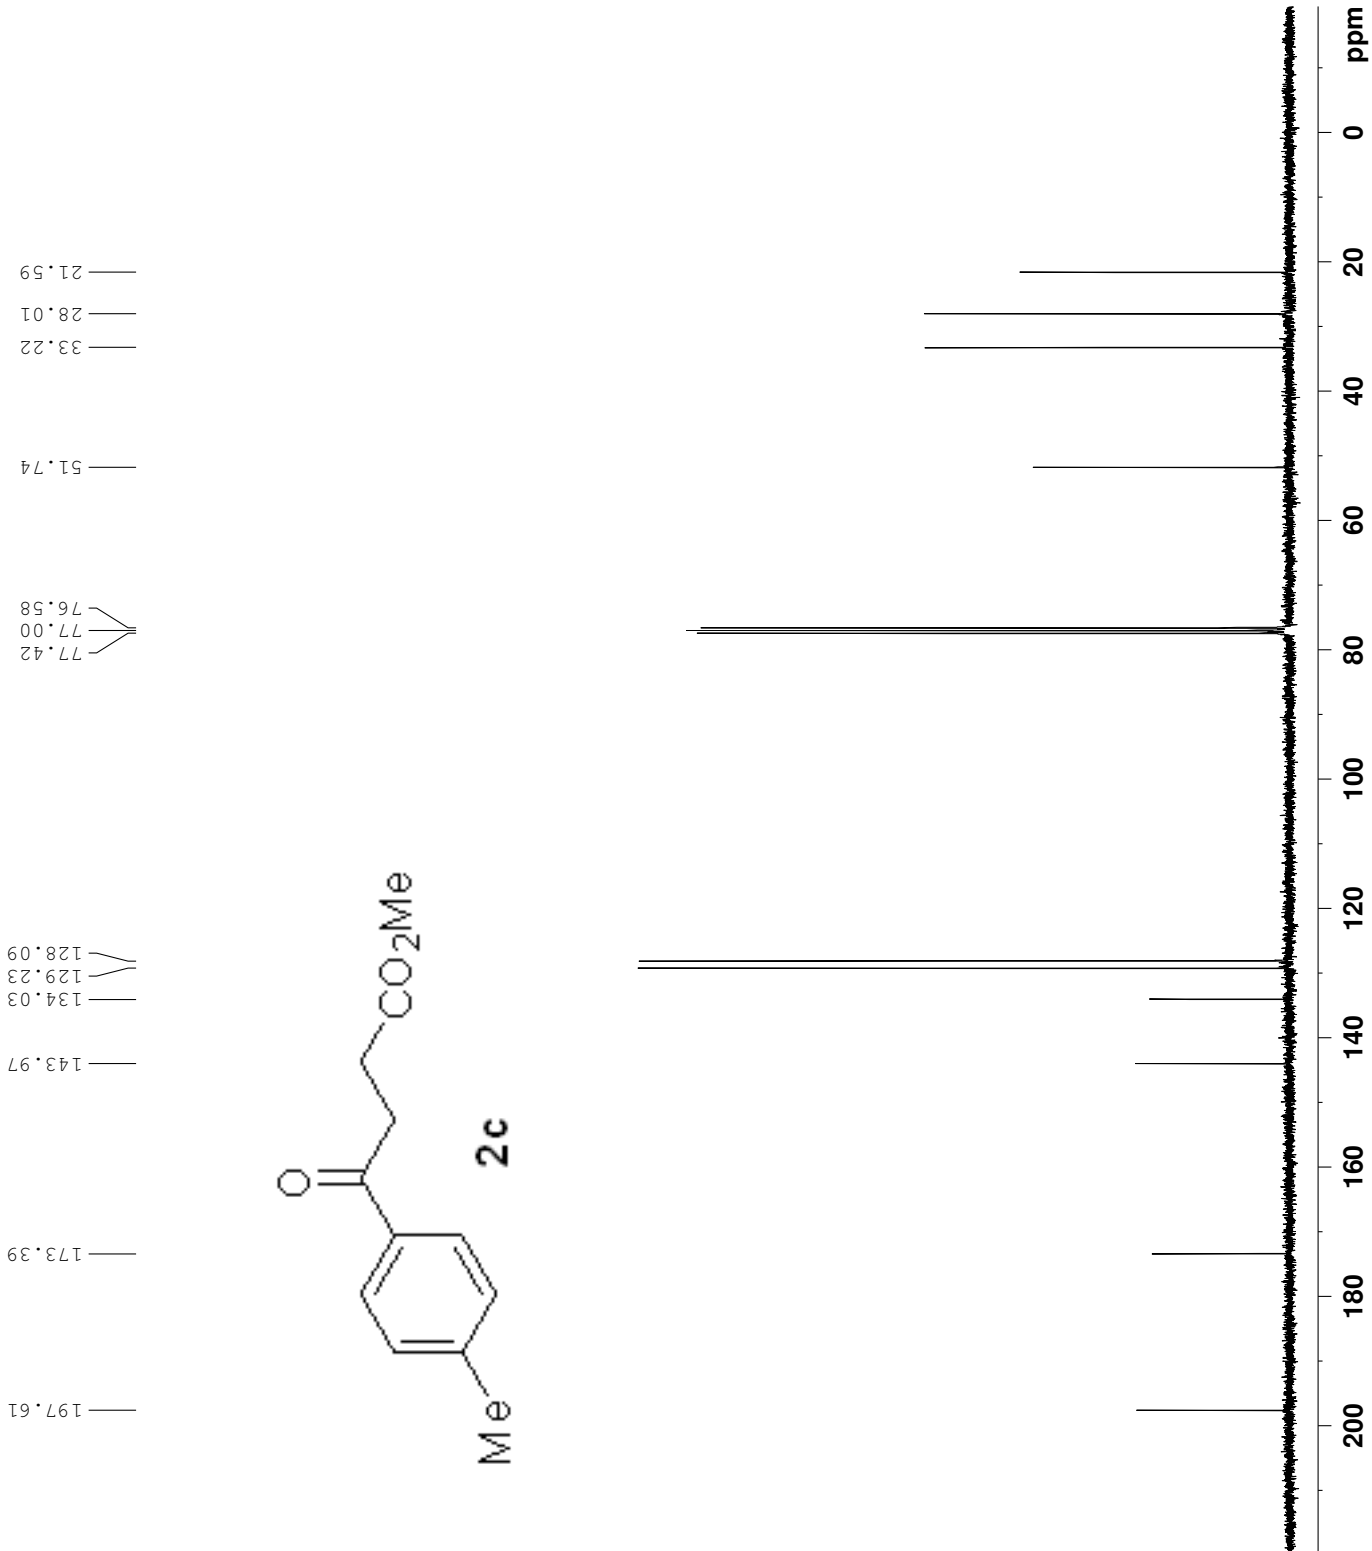





P11

```
NAME 0909121an
EXPNO 2
PROCNO 1
Date_ 20090912
Time_ 15.37
INSTRUM spect
PROBHD 5 mm PABBO BB-
PULPROG zgpg30
TD 65336
SOLVENT CDCl3
NS 418
DS 4
SWH 18028.846 Hz
FIDRES 0.275098 Hz
AQ 1.8175818 sec
RG 203
DW 27.733 usec
DE 6.50 usec
TE 296.8 K
D1 2.00000000 sec
D11 0.03000000 sec
TD0 1

===== CHANNEL f1 =====
NUC1 13C
P1 9.70 usec
P11 0.00 dB
P1LW 29.38907051 W
SFO1 75.4752953 MHz

===== CHANNEL f2 =====
CPDPRG2 waitz16
NUC2 1H
PCPD2 80.00 usec
P12 1.00 dB
P1L 17.00 dB
P113 17.00 dB
P12W 9.17820644 W
P1L2W 0.23054613 W
P1L3W 0.23054613 W
SFO2 300.1312005 MHz
SI 32768
SF 75.4677490 MHz
WDW EM
SSB 0
LB 1.00 Hz
GB 0
PC 1.40
```

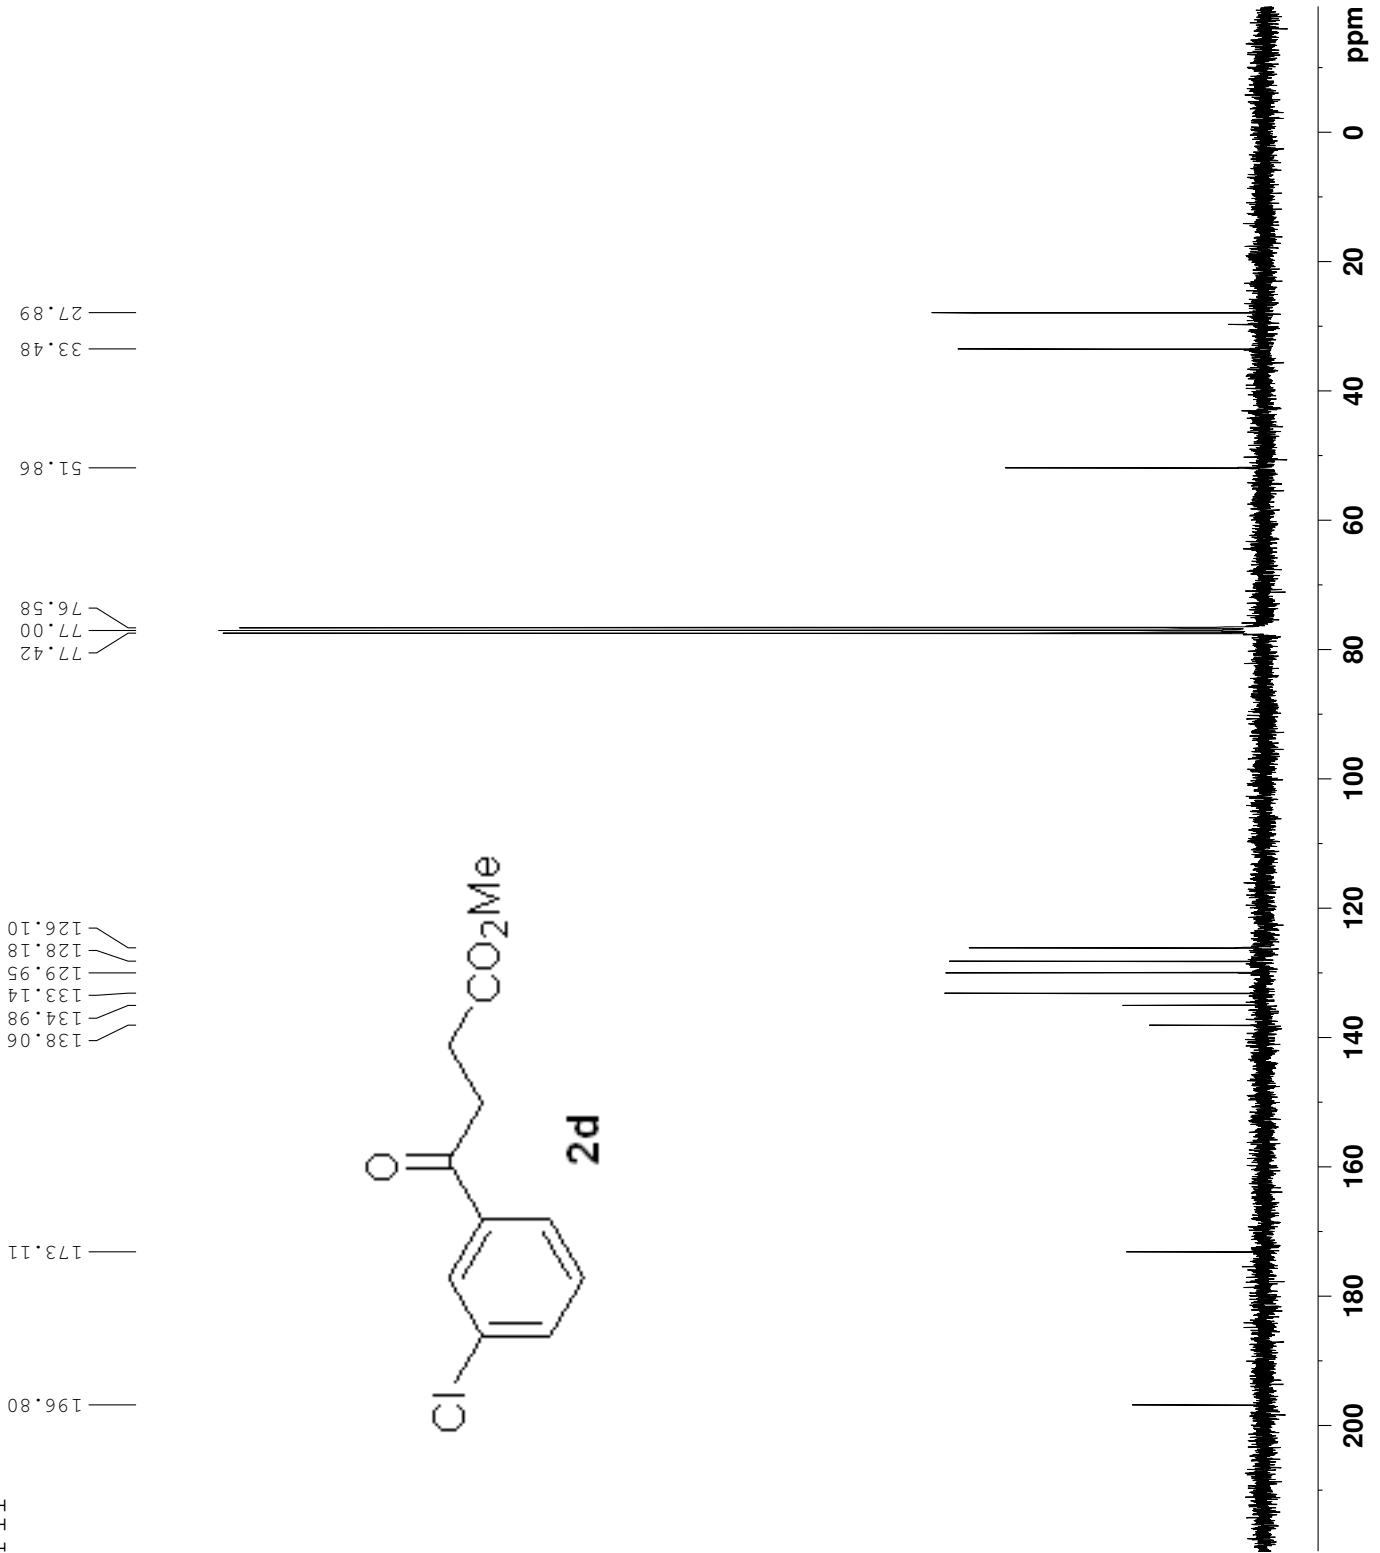

NAME: 0907231an  
 EXPNO: 5  
 PROCNO: 1  
 Date\_: 20090723  
 Time: 14.47  
 INSTRUM: spect  
 PROBHD: 5 mm PABBO BB-  
 PULPROG: zg30  
 ID: 65536  
 SOLVENT: CDCl3  
 NS: 8  
 DS: 2  
 SWH: 6188.119 Hz  
 FIDRES: 0.094423 Hz  
 AQ: 5.2953587 sec  
 RG: 203  
 DW: 80.800 usec  
 DE: 6.50 usec  
 TE: 293.5 K  
 D1: 1.00000000 sec  
 TD0: 1

===== CHANNEL f1 =====  
 NUC1: 1H  
 P1: 11.80 usec  
 PL1: 0.00 dB  
 PL1W: 11.55467796 W  
 SF01: 300.1318534 MHz  
 SI: 32768  
 SF: 300.1300004 MHz  
 WDW: EM  
 SSB: 0  
 LB: 0.30 Hz  
 GB: 0  
 PC: 1.00

3.711  
 3.310  
 3.288  
 3.266  
 2.793  
 2.771  
 2.749

7.942  
 7.936  
 7.920  
 7.913  
 7.461  
 7.455  
 7.439  
 7.432  
 7.266

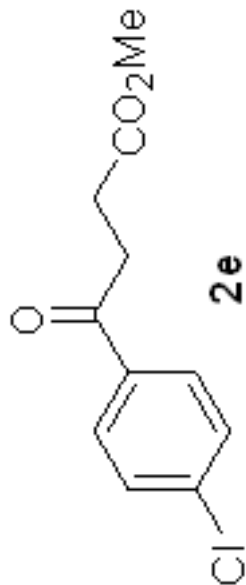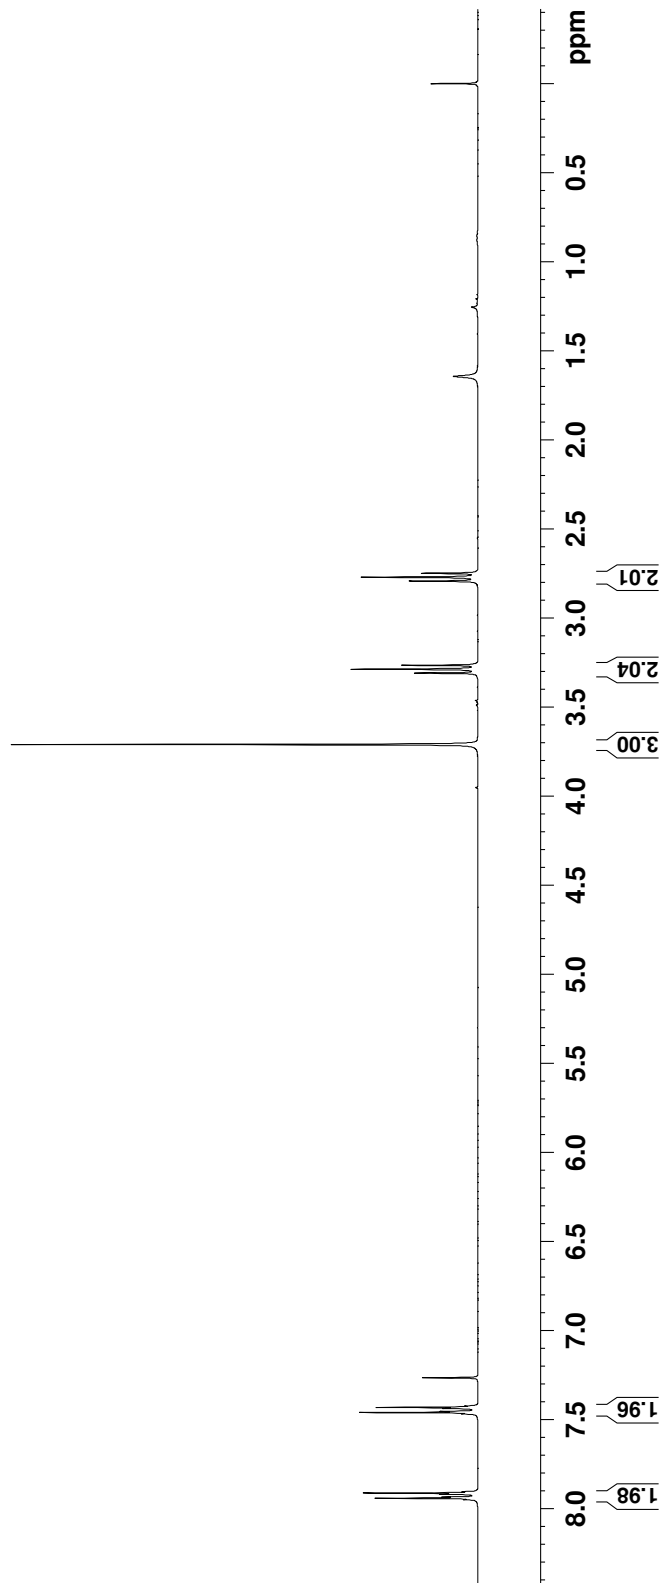

```

NAME 0907231an
EXPNO 8
PROCNO 1
Date_ 20090723
Time 16.03
INSTRUM spect
PROBHD 5 mm F4BBO BB-
PULPROG zgpg30
TD 65536
SOLVENT CDCl3
NS 390
DS 4
SWH 18028.846 Hz
FIDRES 0.275098 Hz
AQ 1.8175818 sec
RG 203
DW 27.733 usec
DE 6.50 usec
TE 294.6 K
D1 2.00000000 sec
D11 0.03000000 sec
TD0 1

===== CHANNEL f1 =====
NUC1 13C
P1 9.70 usec
PL1 0.00 dB
PL1W 29.38907051 W
SFO1 75.4752953 MHz

===== CHANNEL f2 =====
CPDPRG2 waltz16
NUC2 1H
P2 80.00 usec
PL2 1.00 dB
PL12 17.00 dB
PL13 17.00 dB
PL2W 9.17820644 W
PL12W 0.23084613 W
PL13W 0.23084613 W
SFO2 300.132405 MHz
SF 327.68
F2 75.4677514 MHz
EM 0
MDW 1.00 Hz
SSE 0
LB 0
GB 0
PC 1.40

```

21.59  
28.01  
32.22  
51.74  
76.58  
77.00  
77.42

128.09  
129.23  
134.03  
143.97  
173.39  
197.61

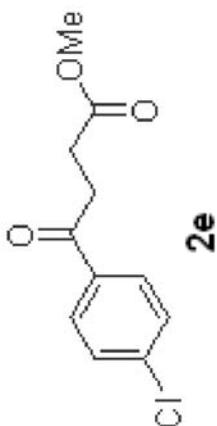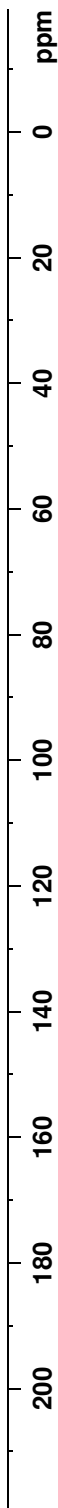

NAME: 0907231an  
 EXPNO: 3  
 PROCNO: 1  
 Date\_: 20090723  
 Time: 11.49  
 INSTRUM: spect  
 PROBHD: 5 mm PABBO BB-  
 PULPROG: zg30  
 ID: 65536  
 SOLVENT: CDCl3  
 NS: 8  
 DS: 2  
 SWH: 6188.119 Hz  
 FIDRES: 0.094423 Hz  
 AQ: 5.2953587 sec  
 RG: 80.6  
 DW: 80.800 usec  
 DE: 6.50 usec  
 TE: 293.9 K  
 D1: 1.00000000 sec  
 TD0: 1

===== CHANNEL f1 =====  
 NUC1: 1H  
 P1: 11.80 usec  
 PL1: 0.00 dB  
 PL1W: 11.55467796 W  
 SF01: 300.1318534 MHz  
 SI: 32768  
 SF: 300.1299996 MHz  
 EM: 0  
 SSB: 0  
 LB: 0.30 Hz  
 GB: 0  
 PC: 1.00

0.000

3.705  
 3.293  
 3.272  
 3.249  
 2.800  
 2.778  
 2.756

7.436  
 7.417  
 7.411  
 7.396  
 7.390  
 7.380  
 7.370  
 7.360  
 7.352  
 7.352  
 7.335  
 7.329  
 7.313  
 7.306  
 7.268

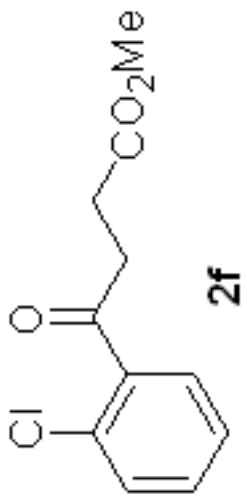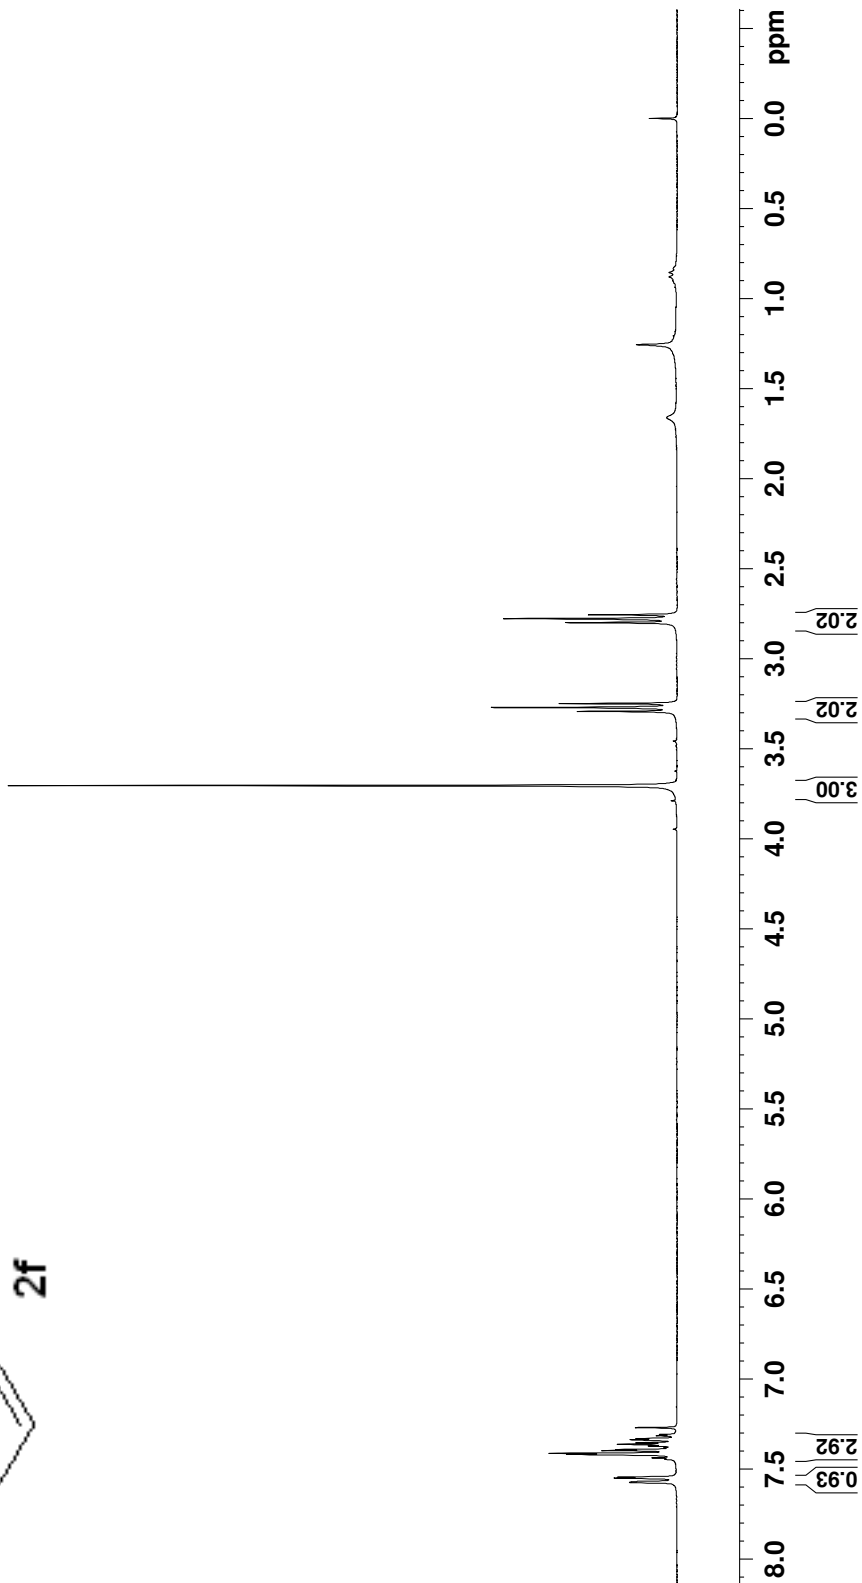

```

NAME      0907231an
EXPNO    4
PROCNO   1
Date_    20090723
Time     12.58
INSTRUM  spect
PROBHD   5 mm PABBO BB-
PULPROG  zgpg30
TD       65536
SOLVENT  CDCl3
NS       1024
DS       4
SWH      18028.846 Hz
FIDRES   0.275098 Hz
AQ       1.8175818 sec
RG       203
DM       27.733 usec
DE       6.50 usec
TE       294.6 K
D1       2.0000000 sec
D11      0.03000000 sec
TD0      1

===== CHANNEL f1 =====
NUC1     13C
P1       9.70 usec
PL1      0.00 dB
PL1W     29.38907051 W
SFO1     75.4752953 MHz

===== CHANNEL f2 =====
CPDPRG2  waitz16
NUC2     1H
P2       80.00 usec
PL2      1.00 dB
PL2W    17.00 dB
PL12     17.00 dB
PL13     17.00 dB
PL12W    9.17820644 W
PL13W    0.23854613 W
SFO2     300.1312005 MHz
SI       32768
SF       75.4677498 MHz
WDW      EM
SSB      0
LB       1.00 Hz
GB       0
PC       1.40

```

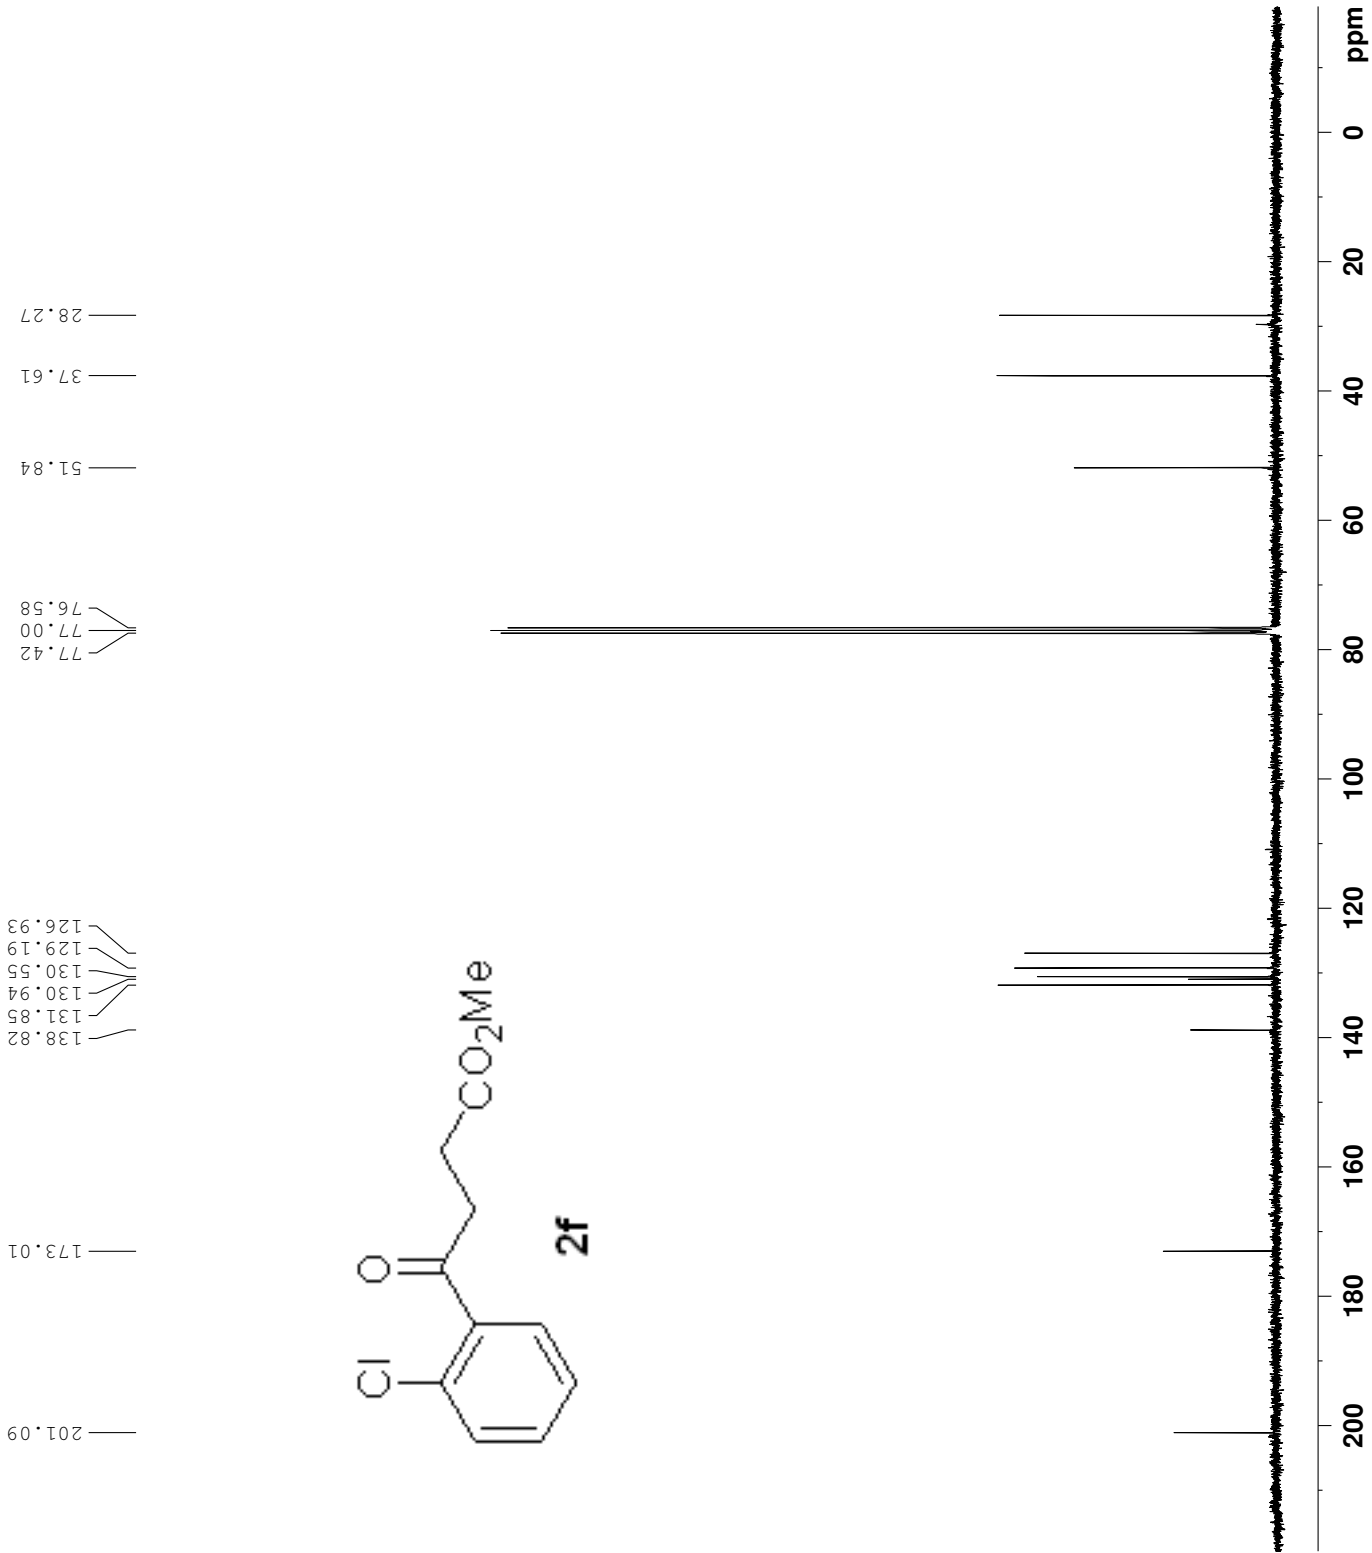

NAME 0907241a1  
 EXPNO 3  
 PROCNO 1  
 Date\_ 20090724  
 Time 12.09  
 INSTRUM spect  
 PROBHD 5 mm PABBO BB-  
 PULPROG zg30  
 TD 65536  
 SOLVENT CDCl3  
 NS 8  
 DS 2  
 SWH 6188.119 Hz  
 FIDRES 0.094423 Hz  
 AQ 5.2953587 sec  
 RG 203  
 DW 80.800 usec  
 DE 6.50 usec  
 TE 296.2 K  
 D1 1.00000000 sec  
 TD0 1

===== CHANNEL f1 =====  
 NUC1 1H  
 P1 11.80 usec  
 PL1 0.00 dB  
 PL1W 11.55467796 W  
 SF01 300.1318534 MHz  
 SI 32768  
 SF 300.1300024 MHz  
 EM  
 SSB 0  
 LB 0.30 Hz  
 GB 0  
 PC 1.00

3.729  
 3.490  
 3.467  
 3.445  
 2.855  
 2.833  
 2.811

8.515  
 8.061  
 8.055  
 8.032  
 8.026  
 7.983  
 7.957  
 7.913  
 7.885  
 7.864  
 7.833  
 7.628  
 7.610  
 7.606  
 7.582  
 7.578  
 7.555  
 7.551  
 7.532  
 7.528  
 7.259

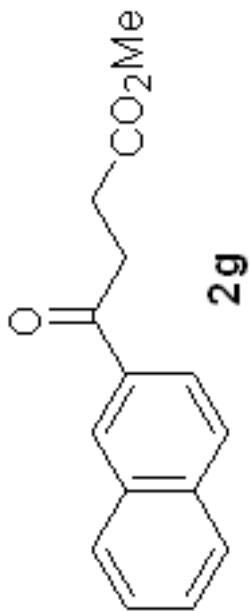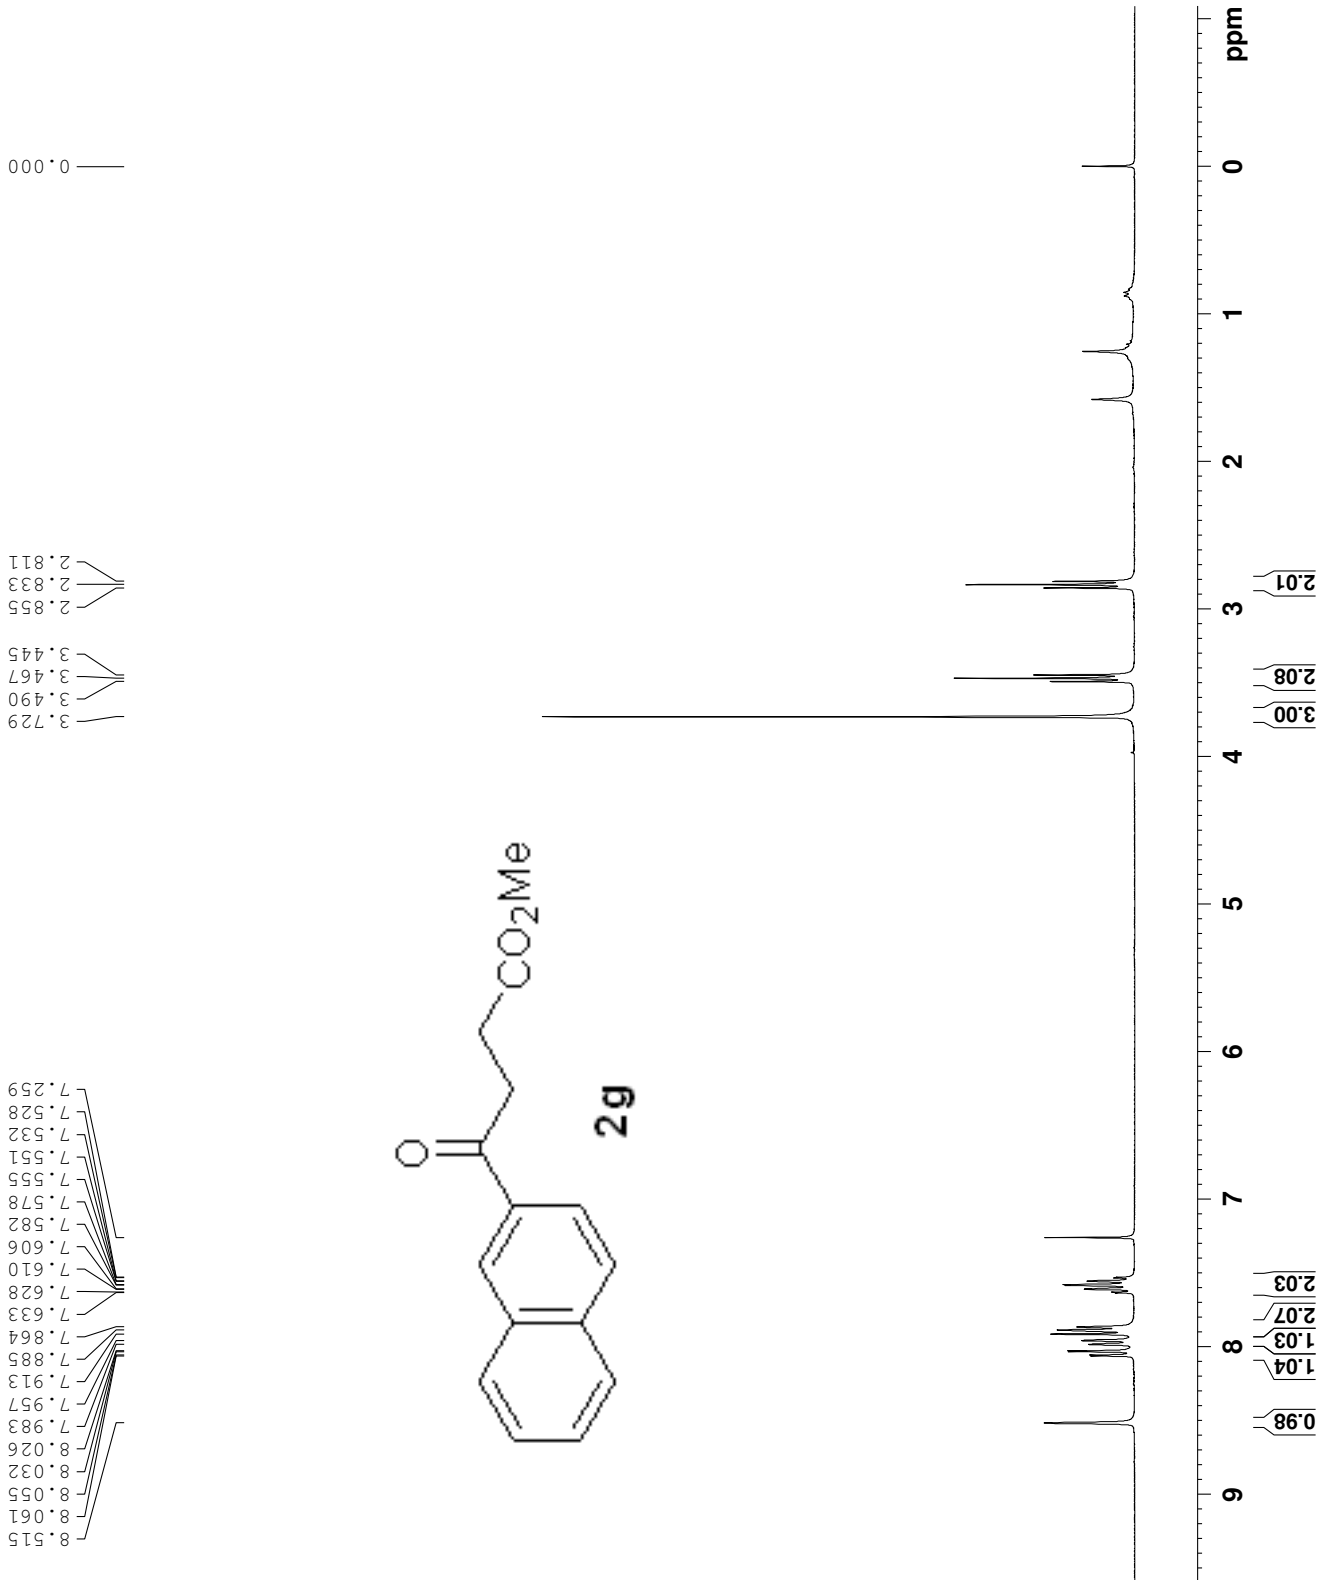

```

NAME      09072411an
EXPNO    2
PROCNO   1
Date_    20090724
Time     11.28
INSTRUM  spect
PROBHD   5 mm PABBO BB-
PULPROG  zgpg30
TD        65536
SOLVENT  CDCl3
NS        608
DS        4
SWH       18028.846 Hz
FIDRES   0.275098 Hz
AQ        1.8175818 sec
RG        203
DW        27.733 usec
DE        6.50 usec
TE        295.4 K
D1        2.0000000 sec
D11       0.03000000 sec
TD0       1

===== CHANNEL f1 =====
NUC1      13C
P1        9.70 usec
PL1       0.00 dB
PL1W      29.38907051 W
SFO1      75.4752953 MHz

===== CHANNEL f2 =====
CPDPRG2   waitz16
NUC2       1H
PCPD2      80.00 usec
PL2        1.00 dB
PL2W       17.00 dB
PL12       17.00 dB
PL13       17.00 dB
PL12W      9.17820644 W
PL13W      0.23054613 W
SFO2      300.1312005 MHz
SI         32768
SF         75.4677487 MHz
WDW        EM
SSB        0
LB         1.00 Hz
GB         0
PC         1.40

```

28.14  
 33.48  
 51.84  
 76.57  
 77.00  
 77.42

123.74  
 126.79  
 127.78  
 128.48  
 128.50  
 129.58  
 129.76  
 132.51  
 133.88  
 135.67

173.42  
 197.96

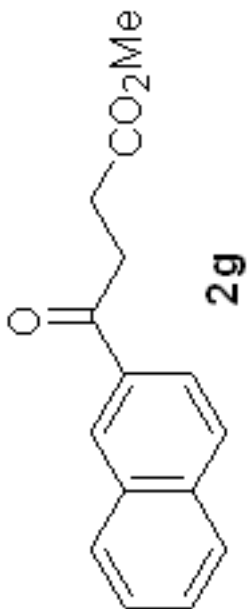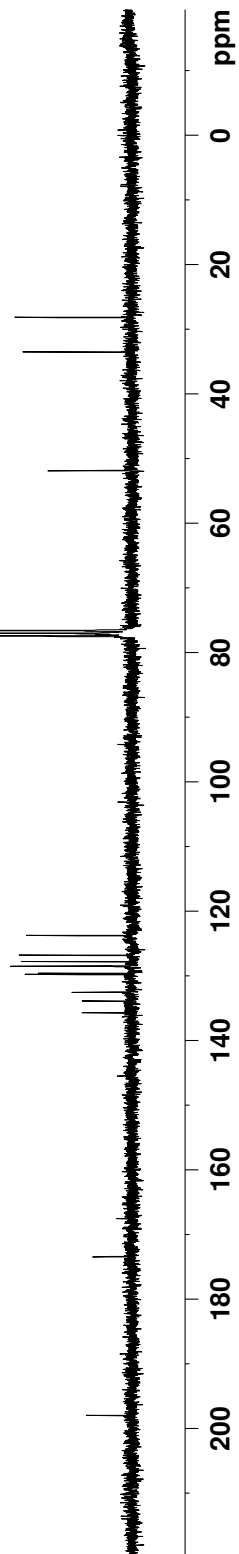

NAME: LAMUNU74C  
 EXPNO: 1  
 PROCNO: 1  
 Date\_: 20090725  
 Time: 15.47  
 INSTRUM: spect  
 PROBHD: 5 mm PABBO BB-  
 PULPROG: zg30  
 TD: 65536  
 SOLVENT: CDCl3  
 NS: 8  
 DS: 2  
 SWH: 6188.119 Hz  
 FIDRES: 0.094423 Hz  
 AQ: 5.2953587 sec  
 RG: 128  
 DW: 80.800 usec  
 DE: 6.50 usec  
 TE: 294.6 K  
 D1: 1.00000000 sec  
 TD0: 1

===== CHANNEL f1 =====  
 NUC1: 1H  
 P1: 11.80 usec  
 PL1: 0.00 dB  
 PL1W: 11.55467796 W  
 SF01: 300.1318534 MHz  
 SI: 32768  
 SF: 300.1300000 MHz  
 EM: 0  
 SSB: 0  
 LB: 0.30 Hz  
 GB: 0  
 PC: 1.00

0.000  
 3.871  
 3.706  
 3.299  
 3.276  
 3.254  
 2.777  
 2.754  
 2.732

7.992  
 7.983  
 7.976  
 7.960  
 7.953  
 7.944  
 7.267  
 6.963  
 6.954  
 6.947  
 6.931  
 6.924  
 6.914

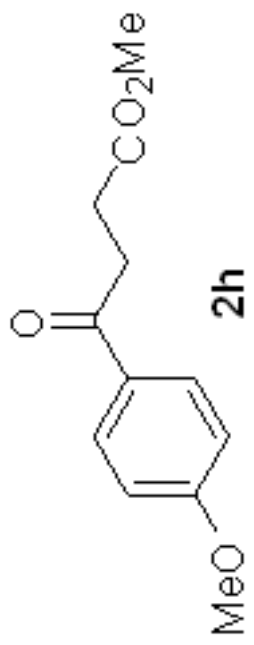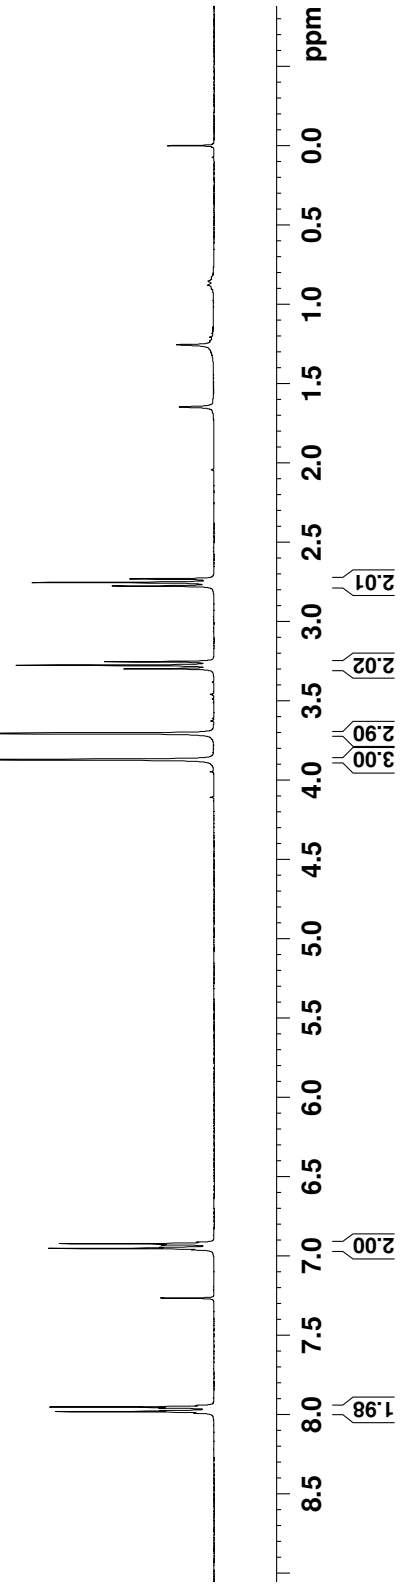



P5

```
NAME 0907271an
EXPNO 3
PROCNO 1
Date_ 20090727
Time_ 10.47
INSTRUM spect
PROBHD 5 mm PABBO BB-
PULPROG zgpg30
TD 65336
SOLVENT CDCl3
NS 188
DS 4
SWH 18028.846 Hz
FIDRES 0.275098 Hz
AQ 1.8175818 sec
RG 203
DM 27.733 usec
DE 6.50 usec
TE 294.5 K
D1 2.0000000 sec
D11 0.0300000 sec
TDO 1

===== CHANNEL f1 =====
NUC1 13C
P1 9.70 usec
PL1 0.00 dB
PL1W 29.38907051 W
SFO1 75.4752953 MHz

===== CHANNEL f2 =====
CPDPRG2 waitz16
NUC2 1H
PCPD2 80.00 usec
PL2 1.00 dB
PL2 17.00 dB
PL1 17.00 dB
PL1W 9.17820644 W
PL2W 0.23854613 W
PL13W 0.23854613 W
SFO2 300.1312005 MHz
SI 32568
SF 75.4677509 MHz
WDW EM
SSB 0
LB 1.00 Hz
GB 0
PC 1.40
```

196.51  
173.47  
163.54  
130.25  
129.61  
113.70  
77.42  
77.00  
76.58  
55.42  
51.75  
32.97  
28.08

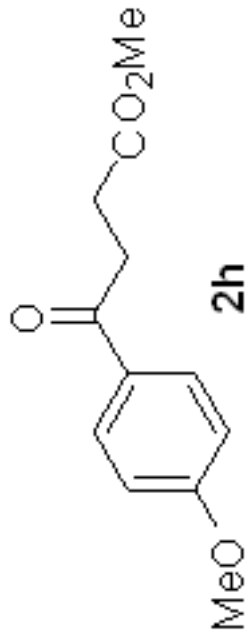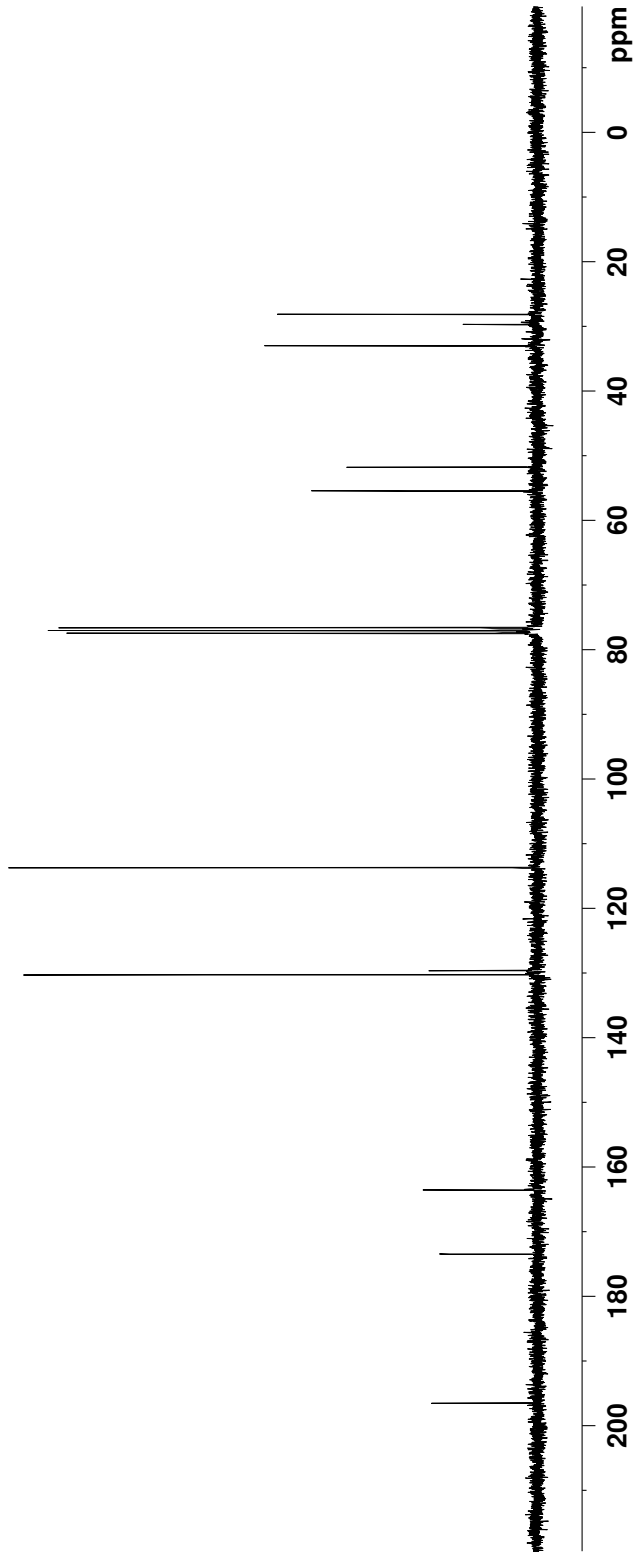

NAME\_1  
 EXPNO 1  
 PROCNO 1  
 Date\_ 20090916  
 Time 15.13  
 INSTRUM spect  
 PROBHD 5 mm PABBO BB-  
 PULPROG zg30  
 TD 6536  
 SOLVENT CDCl3  
 NS 8  
 DS 2  
 SWH 6188.119 Hz  
 FIDRES 0.094423 Hz  
 AQ 5.2953587 sec  
 RG 64  
 DW 80.800 usec  
 DE 6.50 usec  
 TE 293.2 K  
 D1 1.00000000 sec  
 TD0 1

===== CHANNEL f1 =====  
 NUC1 1H  
 P1 11.80 usec  
 PL1 0.00 dB  
 PL1W 11.55467796 W  
 SF01 300.1318534 MHz  
 SI 32768  
 SF 300.1299996 MHz  
 EM  
 SSB 0  
 LB 0.30 Hz  
 GB 0  
 PC 1.00

0.000

2.737  
 2.715  
 2.692  
 3.311  
 3.333  
 3.355  
 3.696  
 3.917

7.779  
 7.774  
 7.754  
 7.748  
 7.498  
 7.492  
 7.469  
 7.446  
 7.440  
 7.268  
 7.026  
 7.001  
 6.987  
 6.978  
 6.959

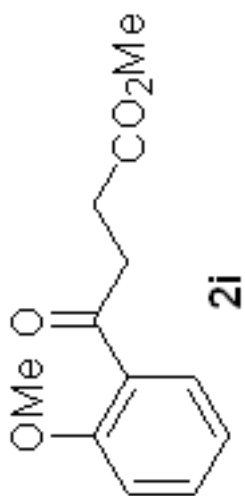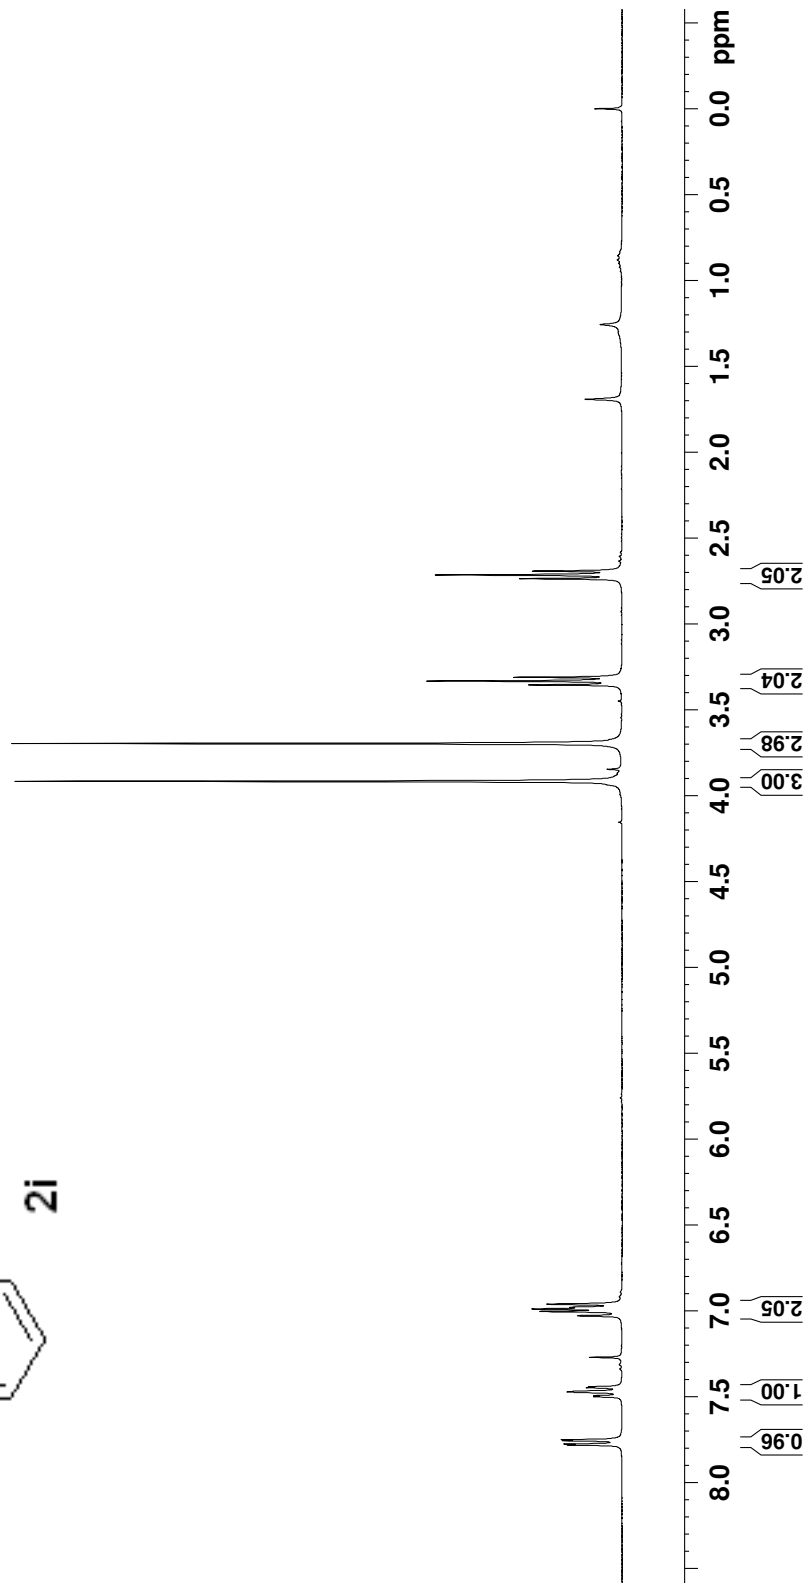

```

NAME      0909161an
EXPNO     2
PROCNO    1
Date_     20090916
Time      15.16
INSTRUM   spect
PROBHD    5 mm PABBO BB-
PULPROG   zgpg30
TD         65536
SOLVENT   CDCl3
NS         283
DS         4
SWH        18028.846 Hz
FIDRES     0.275098 Hz
AQ         1.8175818 sec
RG         203
DM         27.733 usec
DE         6.50 usec
TE         293.7 K
D1         2.0000000 sec
D11        0.0300000 sec
TD0        1

===== CHANNEL f1 =====
NUC1       13C
P1         9.70 usec
PL1        0.00 dB
PL1W       29.38907051 W
SFO1       75.4752953 MHz

===== CHANNEL f2 =====
CPDPRG2    waitz16
NUC2       1H
PCPD2      80.00 usec
PL2        1.00 dB
PL2W       17.00 dB
PL12       17.00 dB
PL13       17.00 dB
PL12W      9.17820644 W
PL13W      0.23854613 W
SFO2       300.1312005 MHz
SI         32768
SF         75.4677509 MHz
WDW        EM
SSB        0
LB         1.00 Hz
GB         0
PC         1.40

```

28.47  
38.71  
51.66  
55.46  
76.57  
77.00  
77.42

111.52  
120.62  
127.40  
130.49  
133.72  
158.86  
173.64  
199.82

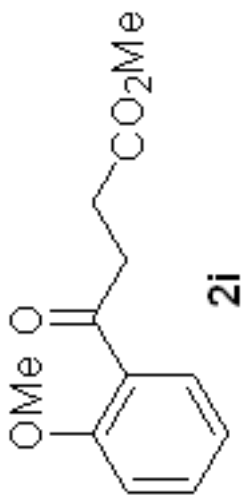

0 20 40 60 80 100 120 140 160 180 200 ppm

NAME: LANUNU728  
 EXPNO: 1  
 PROCNO: 1  
 Date\_: 20090728  
 Time: 20.43  
 INSTRUM: spect  
 PROBHD: 5 mm PABBO BB-  
 PULPROG: zg30  
 ID: 65536  
 SOLVENT: CDCl3  
 NS: 8  
 DS: 2  
 SWH: 6188.119 Hz  
 FIDRES: 0.094423 Hz  
 AQ: 5.2953587 sec  
 RG: 128  
 DW: 80.800 usec  
 DE: 6.50 usec  
 TE: 293.8 K  
 D1: 1.00000000 sec  
 TD0: 1

===== CHANNEL f1 =====  
 NUC1: 1H  
 P1: 11.80 usec  
 PL1: 0.00 dB  
 PL1W: 11.55467796 W  
 SF01: 300.1318534 MHz  
 SI: 32768  
 SF: 300.1299979 MHz  
 EM: 0  
 SSB: 0  
 LB: 0.30 Hz  
 GB: 0  
 PC: 1.00

0.000

3.699  
 3.206  
 3.184  
 3.161  
 2.773  
 2.750  
 2.728

7.593  
 7.590  
 7.274  
 7.231  
 7.220  
 6.554  
 6.548  
 6.542  
 6.536

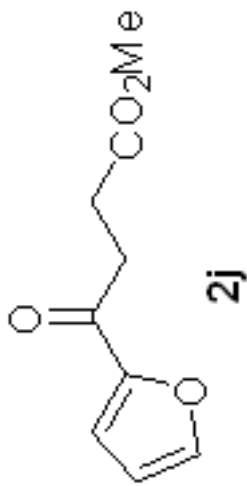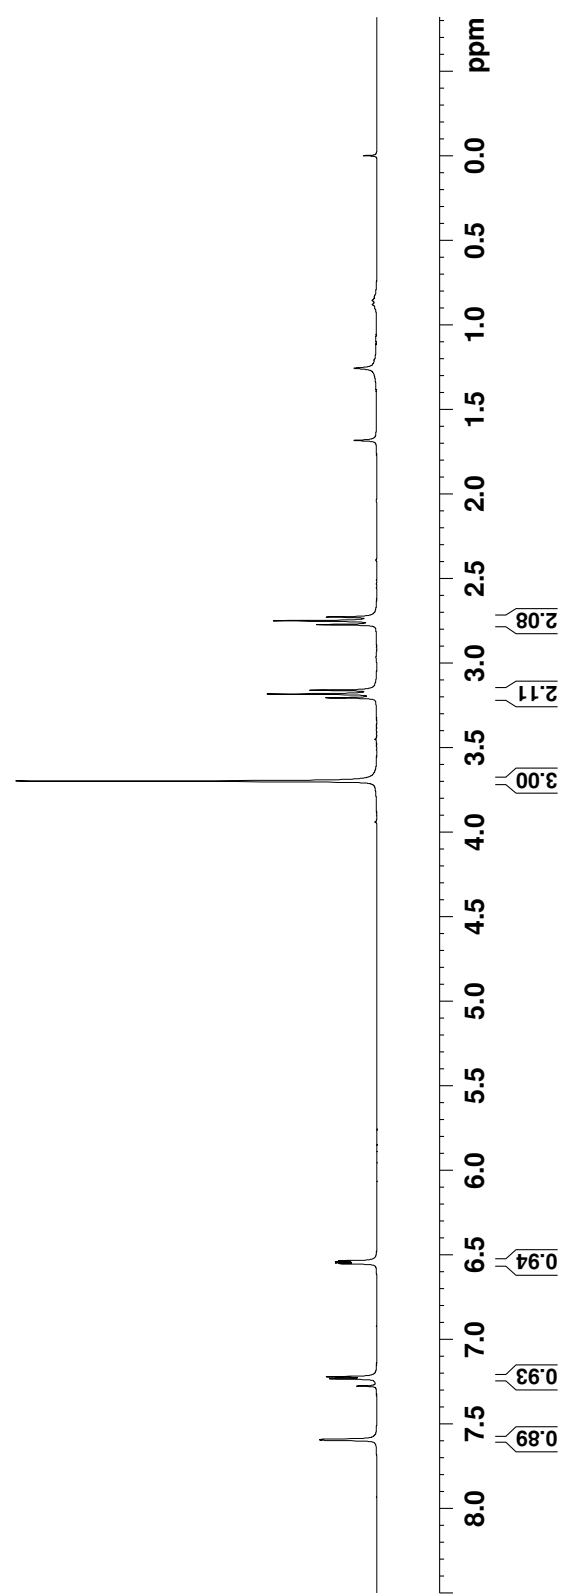

```

NAME 0907291an
EXPNO 1
PROCNO 1
Date_ 20090729
Time_ 9.00
INSTRUM spect
PROBHD 5 mm PABBO BB-
PULPROG zgpg30
TD 65336
SOLVENT CDCl3
NS 670
DS 4
SWH 18028.846 Hz
FIDRES 0.275098 Hz
AQ 1.8175818 sec
RG 203
DW 27.733 usec
DE 6.50 usec
TE 293.8 K
D1 2.0000000 sec
D11 0.0300000 sec
TDO 1

===== CHANNEL f1 =====
NUC1 13C
P1 9.70 usec
PL1 0.00 dB
PL1W 29.38907051 W
SFO1 75.4752953 MHz

===== CHANNEL f2 =====
CPDPRG2 waitz16
NUC2 1H
PCPD2 80.00 usec
PL2 1.00 dB
PL2 17.00 dB
PL1 17.00 dB
PL1W 9.17820644 W
PL12W 0.23854613 W
PL13W 0.23854613 W
SFO2 300.1312005 MHz
SI 32768
SF 75.4677490 MHz
WDW EM
SSB 0
LB 1.00 Hz
GB 0
PC 1.40

```

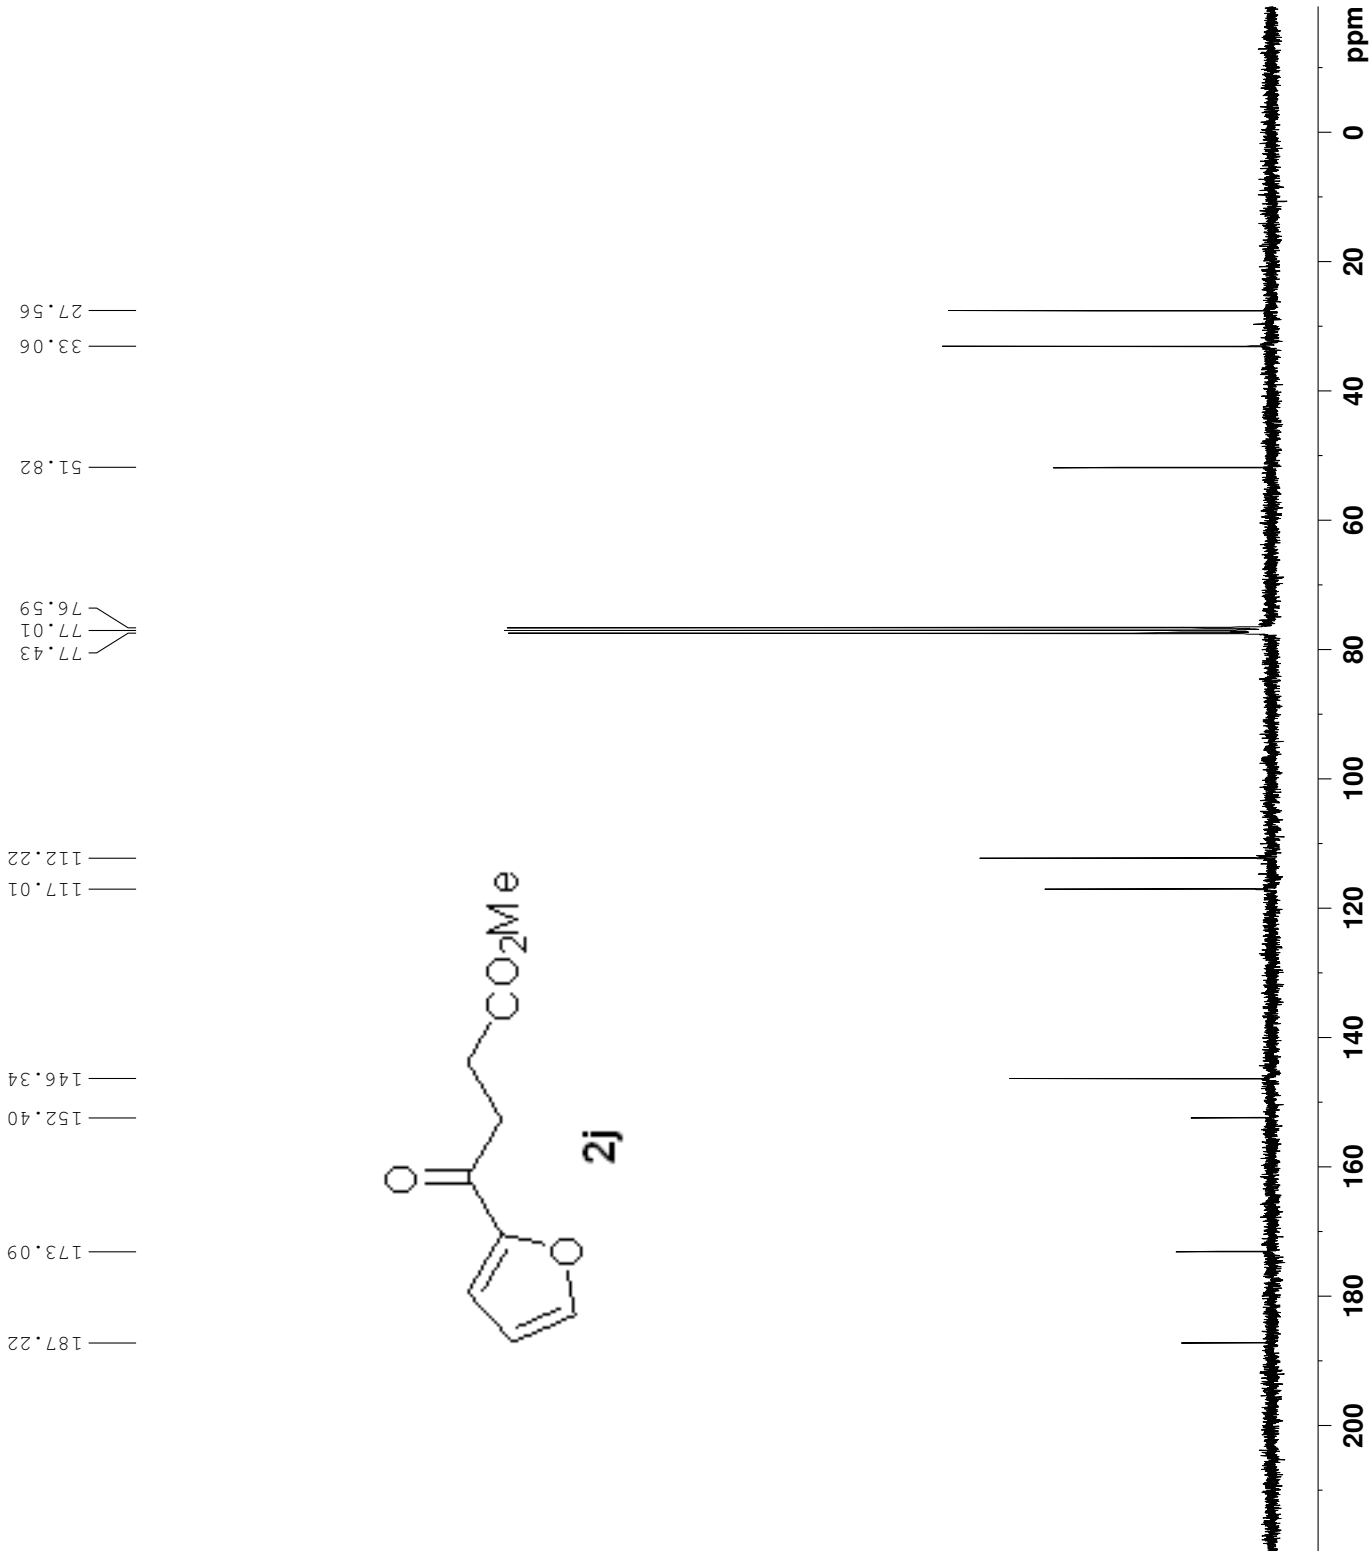

```

NAME          1anun11128
EXPNO         4
PROCNO        1
Date_         20091128
Time          15.56
INSTRUM       spect
PROBHD        5 mm PABBO BB-
PULPROG       zg30
TD            65536
SOLVENT       CDCl3
NS            8
DS            2
SWH           6188.119 Hz
FIDRES        0.094423 Hz
AQ            5.2953587 sec
RG            32
DW            80.800 usec
DE            6.50 usec
TE            289.9 K
D1            1.00000000 sec
TD0           1
===== CHANNEL f1 =====
NUC1          1H
P1            11.80 usec
PL1           0.00 dB
PL1W          11.55467796 W
SF01          300.1318534 MHz
SI            32768
SF            300.1299975 MHz
WDW           EM
SSB           0
LB            0.30 Hz
GB            0
PC            1.00

```

2.680  
 2.702  
 2.724  
 3.002  
 3.024  
 3.047

3.697

6.734  
 6.789  
 7.382  
 7.393  
 7.398  
 7.403  
 7.415  
 7.531  
 7.540  
 7.543  
 7.549  
 7.555  
 7.566  
 7.621

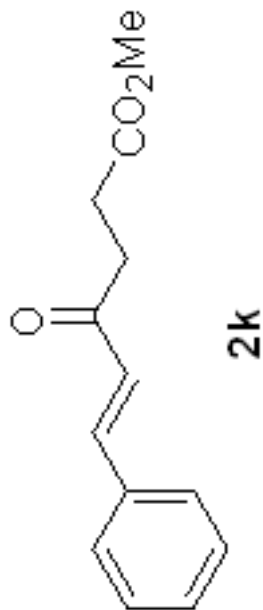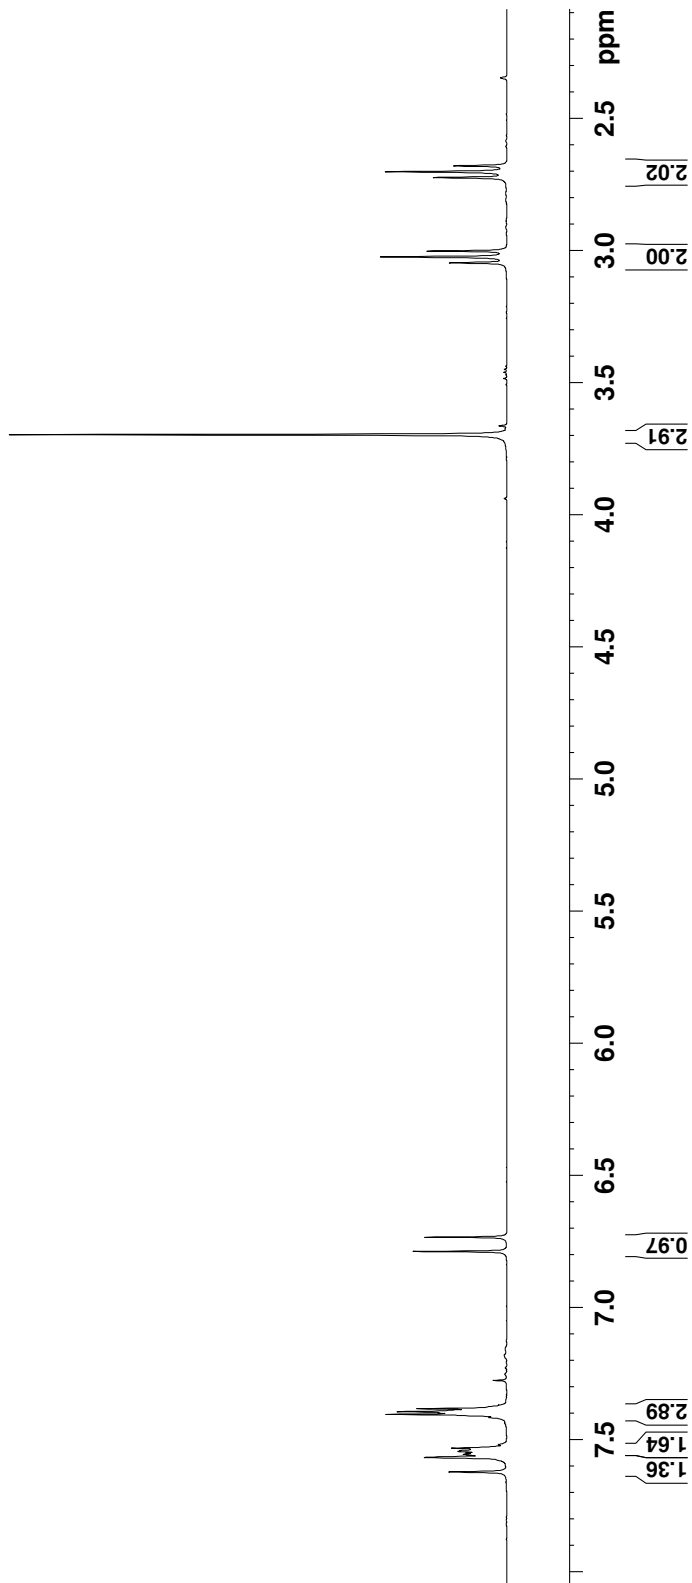

P15

```
NAME lan091128
EXPNO 1
PROCNO 1
Date_ 20091128
Time_ 16.03
INSTRUM spect
PROBHD 5 mm PABBO BB-
PULPROG zgpg30
TD 65336
SOLVENT CDCl3
NS 154
DS 4
SWH 18028.846 Hz
FIDRES 0.275098 Hz
AQ 1.8175818 sec
RG 203
DW 27.733 usec
DE 6.50 usec
TE 290.5 K
D1 2.0000000 sec
D11 0.0300000 sec
TDO 1

===== CHANNEL f1 =====
NUC1 13C
P1 9.70 usec
PL1 0.00 dB
PL1W 29.38907051 W
SFO1 75.4752953 MHz

===== CHANNEL f2 =====
CPDPRG2 waitz16
NUC2 1H
PCPD2 80.00 usec
PL2 1.00 dB
PL2 1.00 dB
PL1 2 17.00 dB
PL1 3 17.00 dB
PL1 2W 9.17820644 W
PL1 2W 0.23854613 W
PL1 3W 0.23854613 W
SFO2 300.1312005 MHz
SI 32768
SF 75.4677564 MHz
WDW EM
SSB 0
LB 1.00 Hz
GB 0
PC 1.40
```

197.86  
173.24  
142.82  
134.26  
130.45  
128.85  
128.21  
125.69

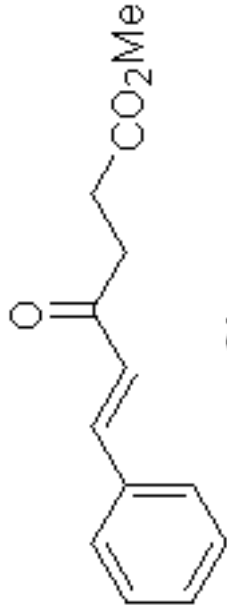

77.42  
77.00  
76.57

51.71  
35.12  
27.80

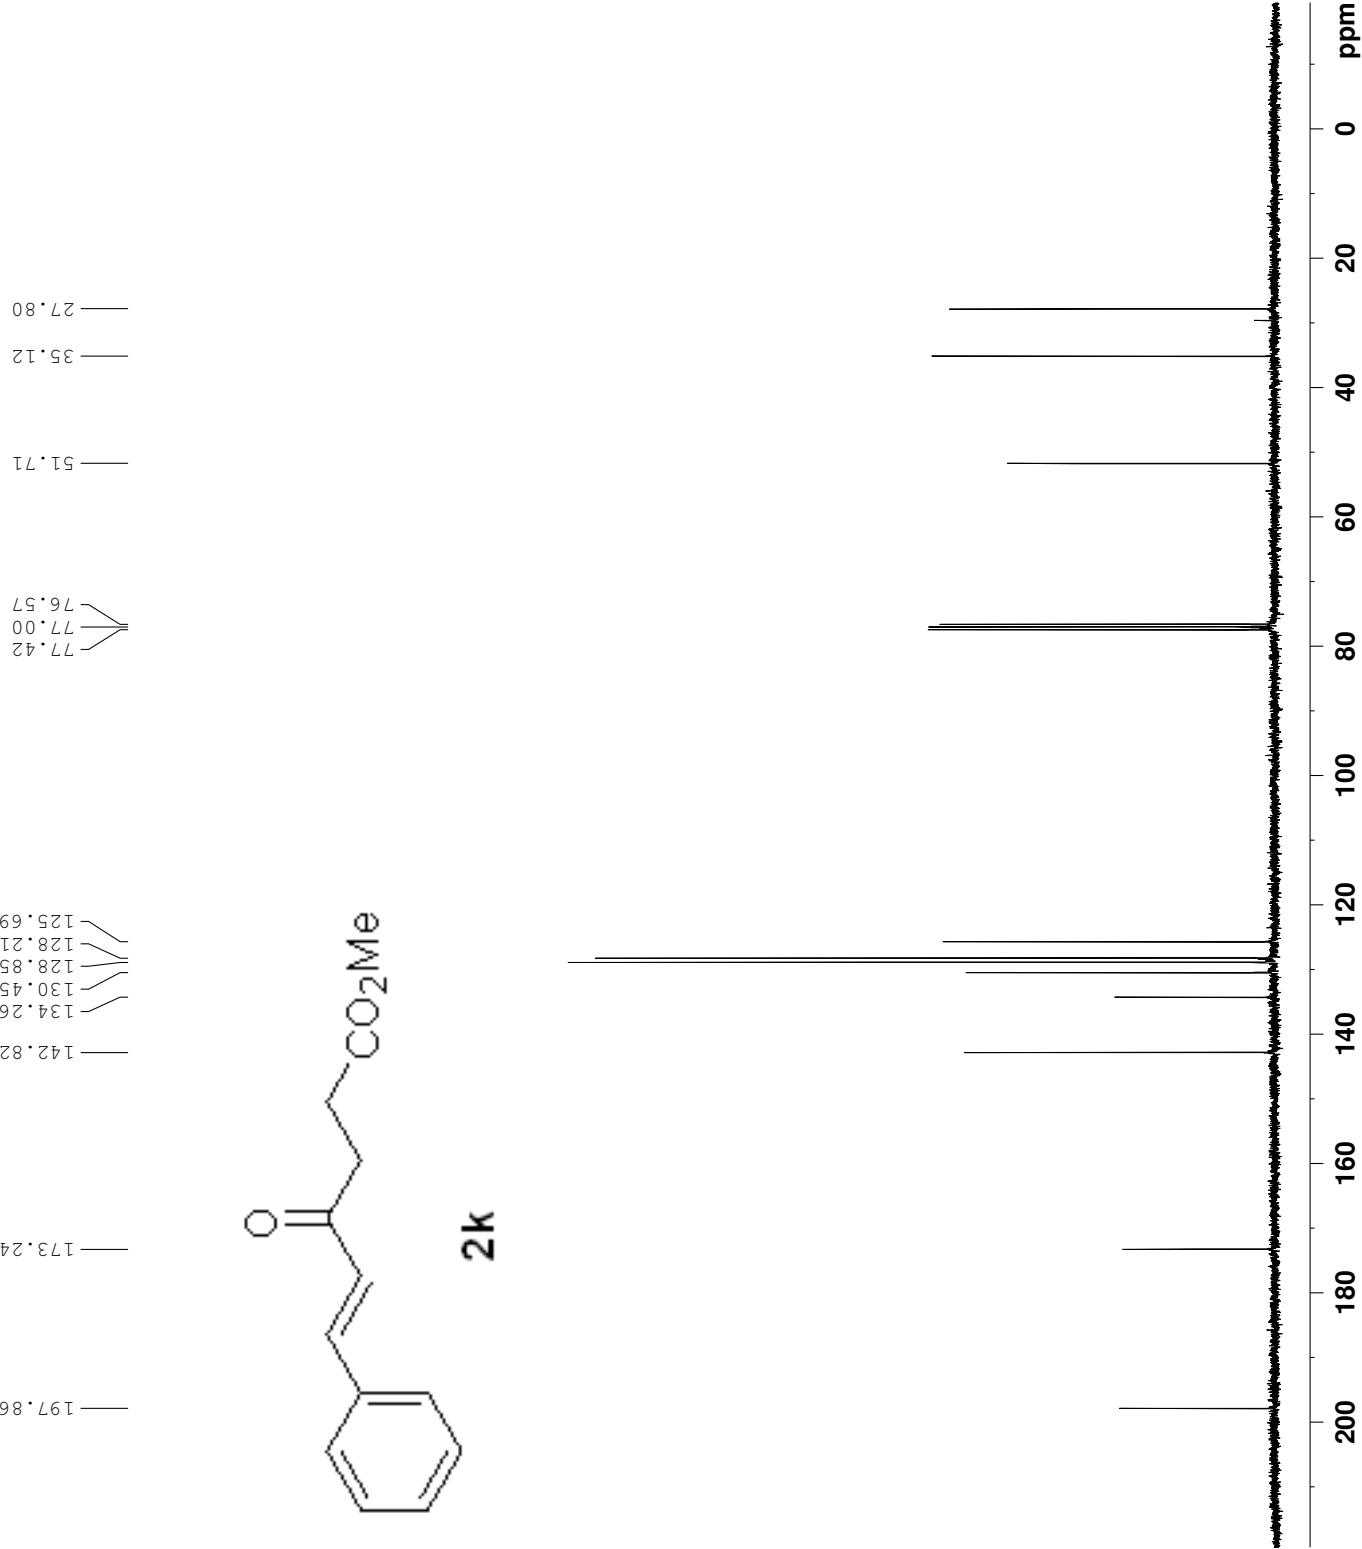

```

NAME          1anup111z
EXPNO         2
PROCNO        1
Date_         20091128
Time          15.43
INSTRUM       spect
PROBHD        5 mm PABBO BB-
PULPROG       zg30
TD            65536
SOLVENT       CDCl3
NS            8
DS            2
SWH           6188.119 Hz
FIDRES        0.094423 Hz
AQ            5.2953587 sec
RG            45.2
DW            80.800 usec
DE            6.50 usec
TE            289.3 K
D1            1.00000000 sec
TD0           1

===== CHANNEL f1 =====
NUC1          1H
P1            11.80 usec
PL1           0.00 dB
PL1W          11.55467796 W
SF01          300.1318534 MHz
SI            32768
SF            300.1299956 MHz
WDW           EM
SSB           0
LB            0.30 Hz
GB            0
PC            1.00

```

0.000

1.161  
1.172  
1.179  
1.201  
1.213  
1.216  
1.232  
1.238  
1.255  
1.262  
1.286  
1.302  
1.341  
1.374  
1.381  
1.414  
1.645  
1.648  
1.656  
1.672  
1.676  
1.681  
1.687  
1.691  
1.769  
1.773  
1.787  
1.794  
1.798  
1.804  
1.857  
1.877  
1.881  
1.892  
2.336  
2.347  
2.359  
2.373  
2.384  
2.396  
2.410  
2.421  
2.433  
2.559  
2.579  
2.602  
2.740  
2.763  
2.785

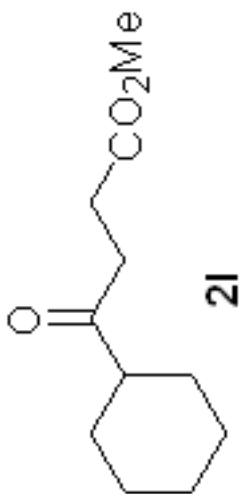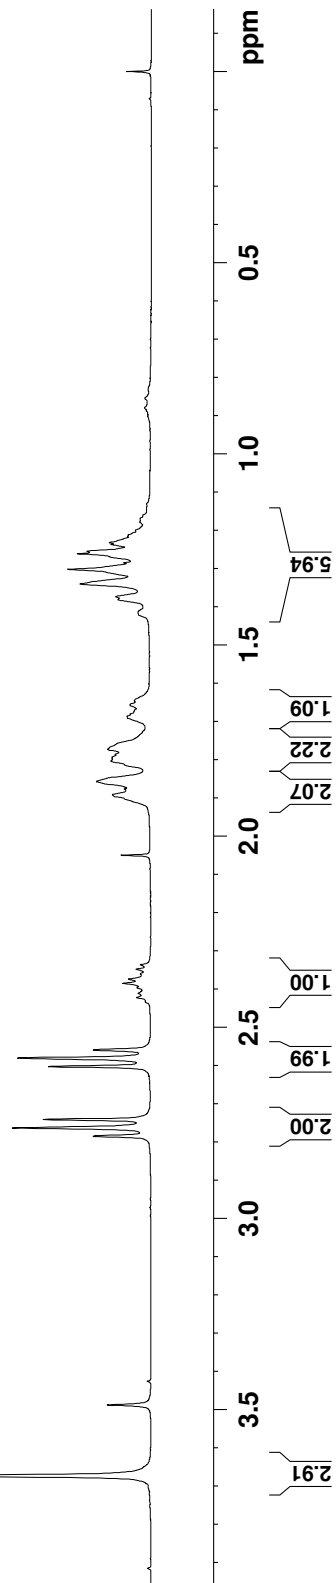



P14

212.03

173.38

76.57  
77.00  
77.42

51.70  
50.65

34.94  
28.41  
27.64  
25.77  
25.57

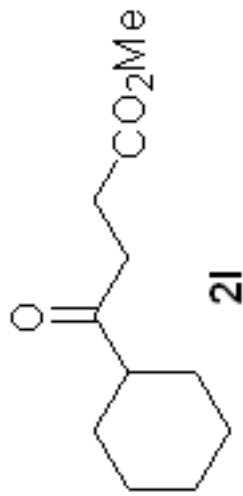

```
NAME lan091128
EXPNO 3
PROCNO 1
Date_ 20091128
Time_ 15.49
INSTRUM spect
PROBHD 5 mm PABBO BB-
PULPROG zgpg30
TD 65336
SOLVENT CDCl3
NS 96
DS 4
SWH 18028.846 Hz
FIDRES 0.275098 Hz
AQ 1.8175818 sec
RG 203
DM 27.733 usec
DE 6.50 usec
TE 290.6 K
D1 2.0000000 sec
D11 0.0300000 sec
TD0 1

===== CHANNEL f1 =====
NUC1 13C
P1 9.70 usec
PL1 0.00 dB
PL1W 29.38907051 W
SFO1 75.4752953 MHz

===== CHANNEL f2 =====
CPDPRG2 waitz16
NUC2 1H
PCPD2 80.00 usec
PL2 1.00 dB
PL2 17.00 dB
PL1 17.00 dB
PL1 17.00 dB
PL2W 9.17820644 W
PL1W 0.23854613 W
PL13W 0.23854613 W
SFO2 300.1312005 MHz
SI 32768
SF 75.4677514 MHz
WDW EM
SSB 0
LB 1.00 Hz
GB 0
PC 1.40
```

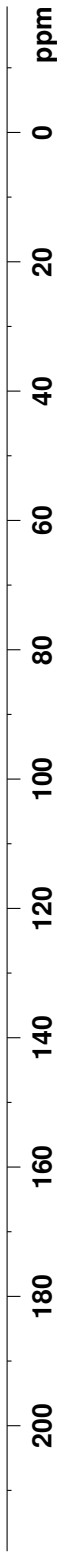

NAME: 09U7081MAN  
 EXPNO: 1  
 PROCNO: 1  
 Date\_: 20090708  
 Time: 11.19  
 INSTRUM: spect  
 PROBHD: 5 mm PABBO BB-  
 PULPROG: zg30  
 ID: 65536  
 SOLVENT: CDCl3  
 NS: 8  
 DS: 2  
 SWH: 6188.119 Hz  
 FIDRES: 0.094423 Hz  
 AQ: 5.2953587 sec  
 RG: 203  
 DW: 80.800 usec  
 DE: 6.50 usec  
 TE: 294.0 K  
 D1: 1.00000000 sec  
 TDO: 1

===== CHANNEL f1 =====  
 NUC1: 1H  
 P1: 11.80 usec  
 PL1: 0.00 dB  
 PL1W: 11.55467796 W  
 SF01: 300.1318534 MHz  
 SI: 32768  
 SF: 300.1300006 MHz  
 EM: 0  
 SSB: 0  
 LB: 0.30 Hz  
 GB: 0  
 PC: 1.00

0.000

0.900  
0.879  
0.856

1.609  
1.587  
1.561  
1.537  
1.333  
1.309  
1.292  
1.279  
1.264

2.746  
2.725  
2.704  
2.606  
2.585  
2.565  
2.470  
2.446  
2.421

3.676

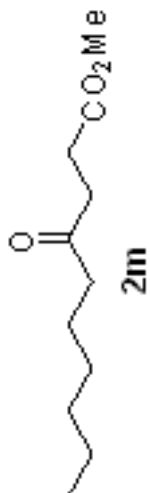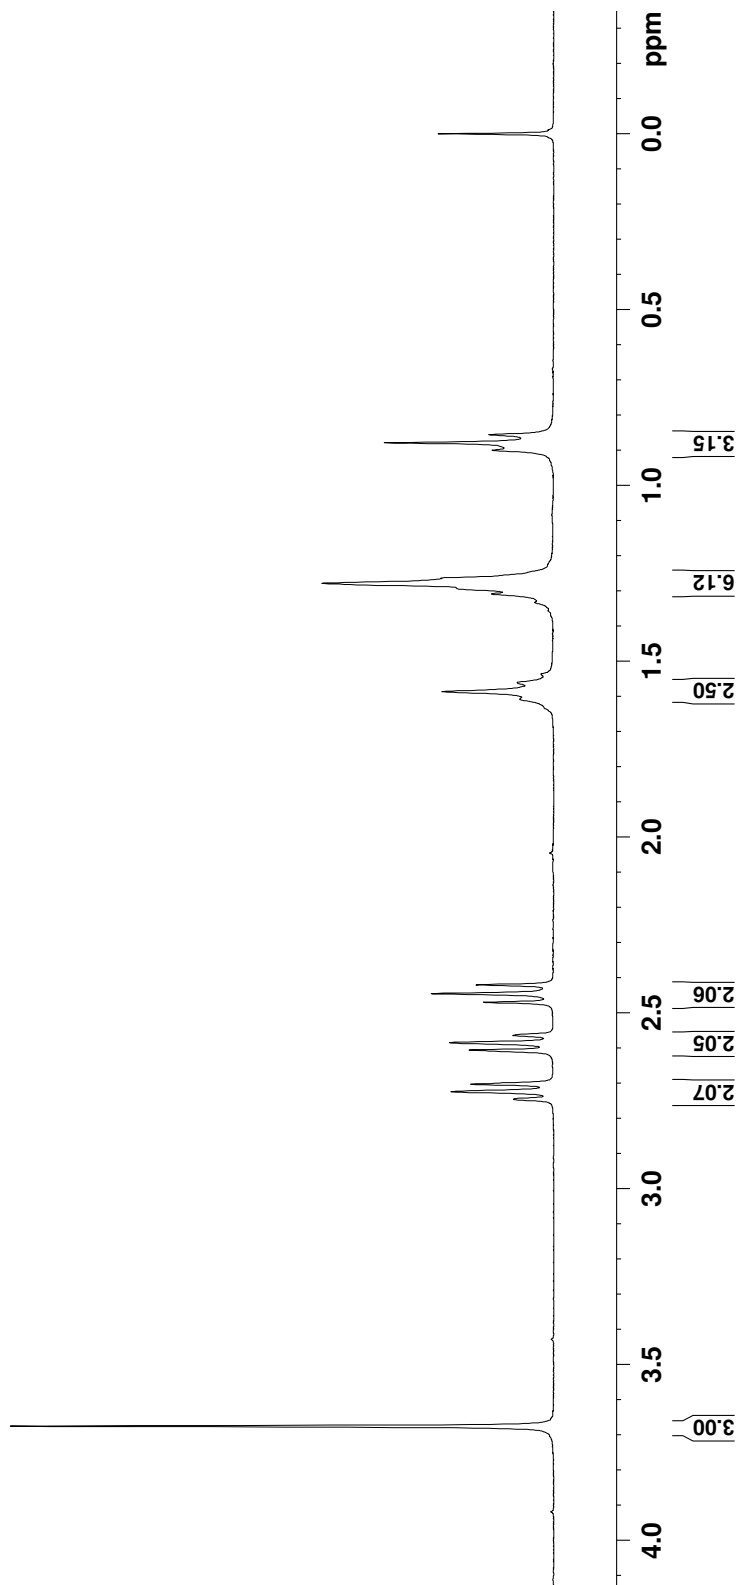



```

NAME          0920709.MAN
EXPNO         4
PROCNO        1
Date_         20090709
Time          15.46
INSTRUM       spect
PROBHD        5 mm PABBO BB-
PULPROG       zg30
TD            65536
SOLVENT       CDCl3
NS            8
DS            2
SWH           6188.119 Hz
FIDRES        0.094423 Hz
AQ            5.2953587 sec
RG            45.2
DW            80.800 usec
DE            6.50 usec
TE            294.1 K
D1            1.00000000 sec
TD0           1

===== CHANNEL f1 =====
NUC1          1H
P1            11.80 usec
PL1           0.00 dB
PL1W          11.55467796 W
SF01          300.1318534 MHz
SI            32768
SF            300.1299940 MHz
WDW           EM
SSB           0
LB            0.30 Hz
GB            0
PC            1.00

```

0.882  
0.906  
0.931

1.258  
1.282  
1.306  
1.331  
1.357  
1.381  
1.528  
1.553  
1.579  
1.597  
1.604  
1.628

2.430  
2.455  
2.479  
2.563  
2.565  
2.585  
2.607  
2.708  
2.729  
2.750

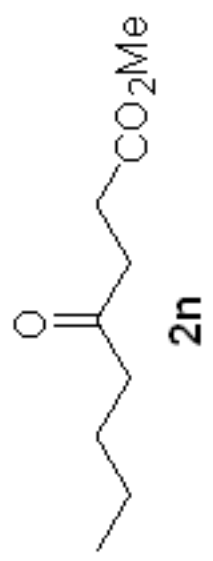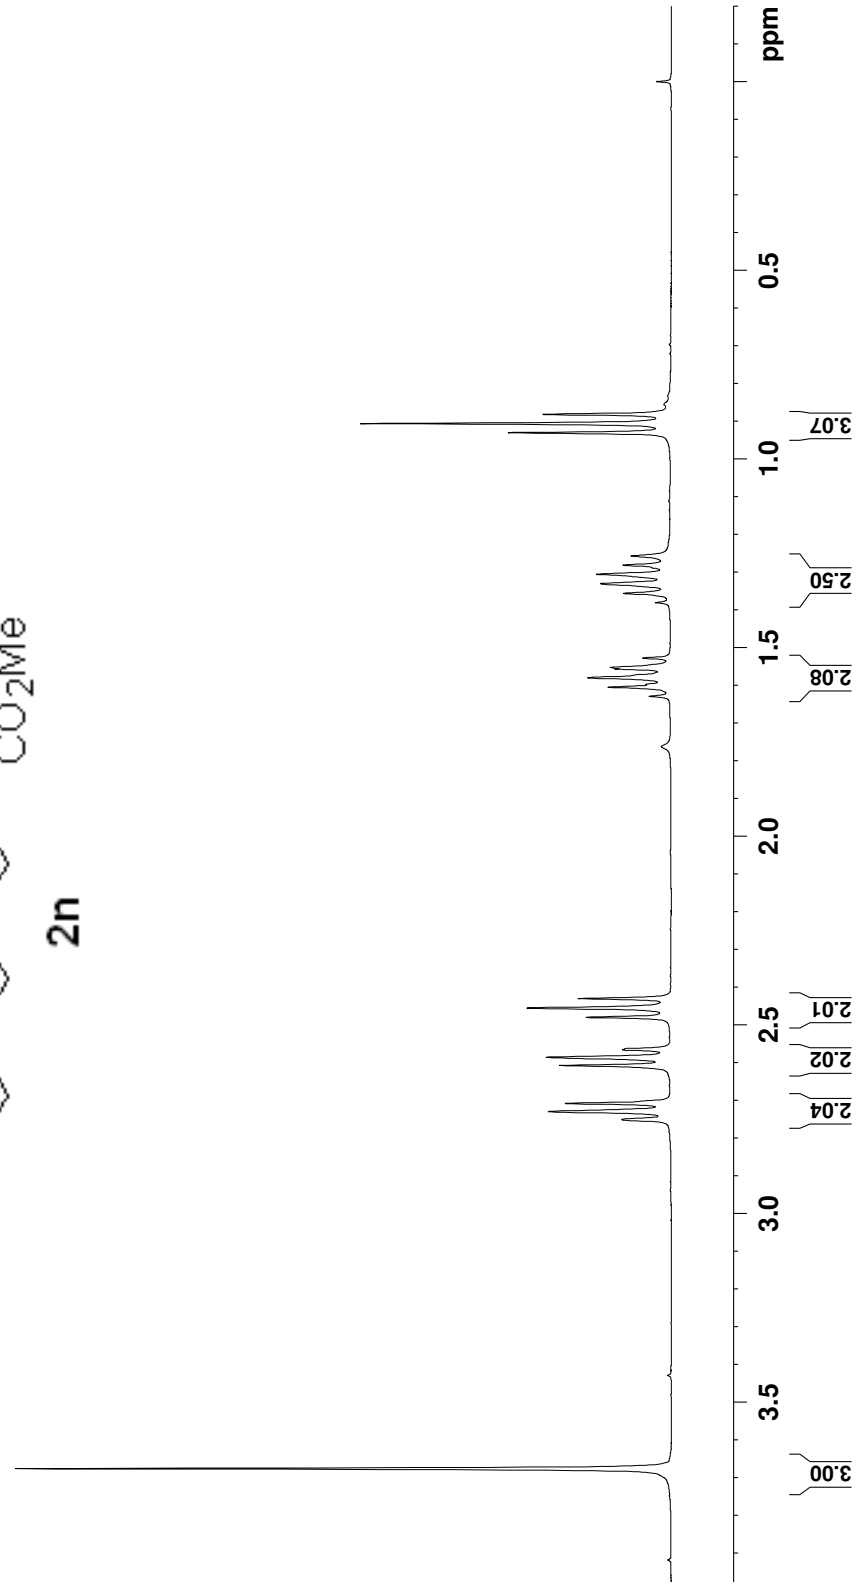

Wu guan

NAME 090709LAN  
EXPNO 5  
PROCNO 1  
Date\_ 20090709  
Time\_ 15.51  
INSTRUM spect  
PROBHD 5 mm PABBO BB-  
PULPROG zgpg30  
TD 65336  
SOLVENT CDCl3  
NS 70  
DS 4  
SWH 18028.846 Hz  
FIDRES 0.275098 Hz  
AQ 1.8175818 sec  
RG 203  
DM 27.733 usec  
DE 6.50 usec  
TE 294.8 K  
D1 2.0000000 sec  
D11 0.0300000 sec  
TD0 1

===== CHANNEL f1 =====  
NUC1 13C  
P1 9.70 usec  
PL1 0.00 dB  
PL1W 29.38907051 W  
SFO1 75.4752953 MHz  
===== CHANNEL f2 =====  
CPDPRG2 waitz16  
NUC2 1H  
PCPD2 80.00 usec  
PL2 1.00 dB  
PL2 17.00 dB  
PL1 2 17.00 dB  
PL1 3 17.00 dB  
PL2W 9.17820644 W  
PL1 2W 0.23854613 W  
PL1 3W 0.23854613 W  
SFO2 300.1312005 MHz  
SI 32768  
SF 75.4677503 MHz  
WDW EM  
SSB 0  
LB 1.00 Hz  
GB 0  
PC 1.40

13.76  
22.24  
25.84  
27.66  
36.94  
42.44  
51.69  
76.58  
77.00  
77.43  
173.26  
209.0

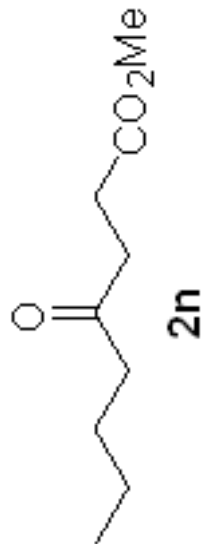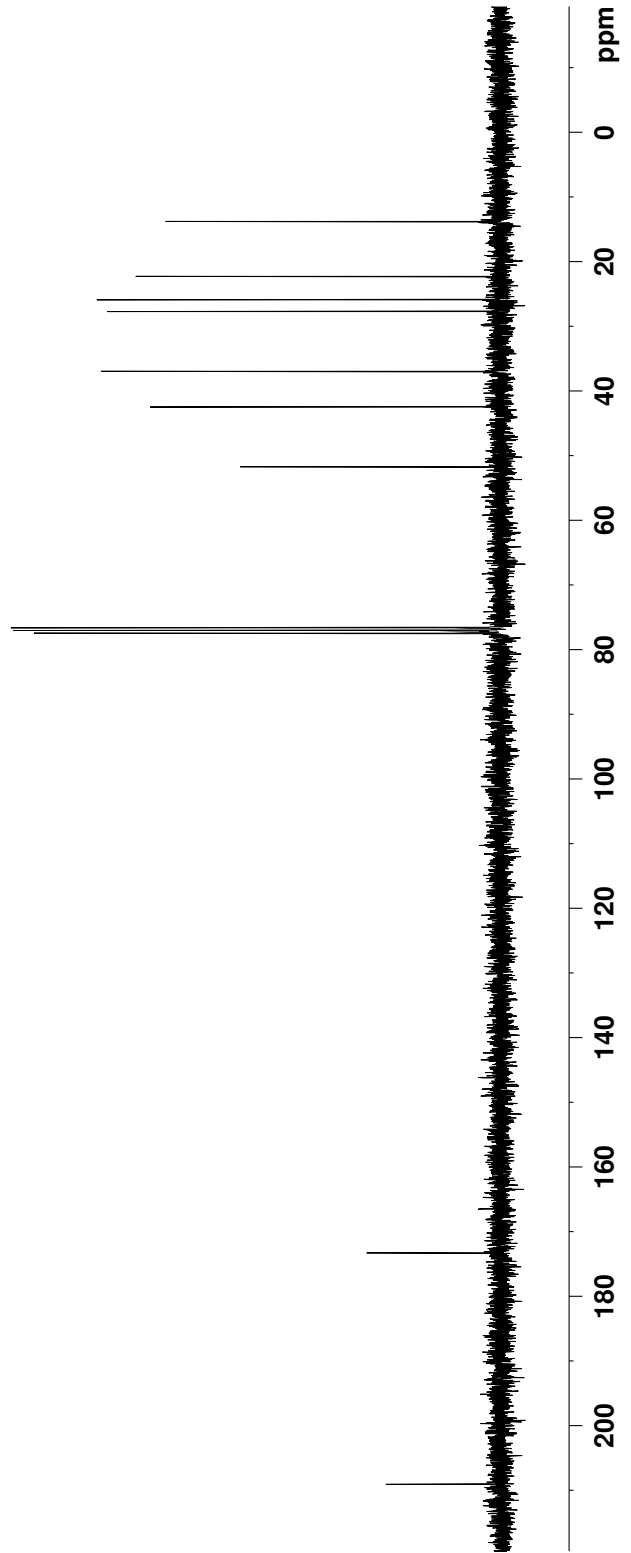



ben jia quan

NAME 090709LAN  
EXPNO 3  
PROCNO 1  
Date\_ 20090709  
Time\_ 14.49  
INSTRUM spect  
PROBHD 5 mm PABBO BB-  
PULPROG zgpg30  
TD 65336  
SOLVENT CDCl3  
NS 127  
DS 4  
SWH 18028.846 Hz  
FIDRES 0.275098 Hz  
AQ 1.8175818 sec  
RG 203  
DW 27.733 usec  
DE 6.50 usec  
TE 294.4 K  
D1 2.0000000 sec  
D11 0.0300000 sec  
TD0 1  
===== CHANNEL f1 =====  
NUC1 13C  
P1 9.70 usec  
PL1 0.00 dB  
PL1W 29.38907051 W  
SFO1 75.4752953 MHz  
===== CHANNEL f2 =====  
CPDPRG2 waitz16  
NUC2 1H  
PCPD2 80.00 usec  
PL2 1.00 dB  
PL2 17.00 dB  
PL1 17.00 dB  
PL1 17.00 dB  
PL2W 9.17820644 W  
PL1W 0.23854613 W  
PL1 0.23854613 W  
SFO2 300.1312005 MHz  
SI 32768  
SF 75.4677503 MHz  
WDW EM  
SSB 0  
LB 1.00 Hz  
GB 0  
PC 1.40

128.00  
128.59  
133.21  
136.50

76.58  
77.00  
77.42

51.80  
33.37  
27.99

173.34

198.01

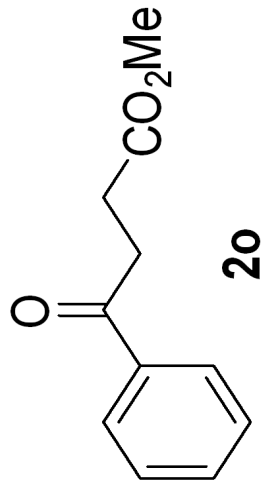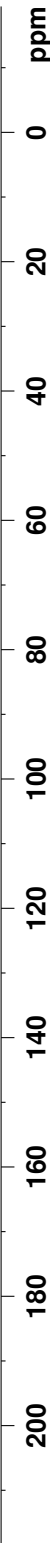

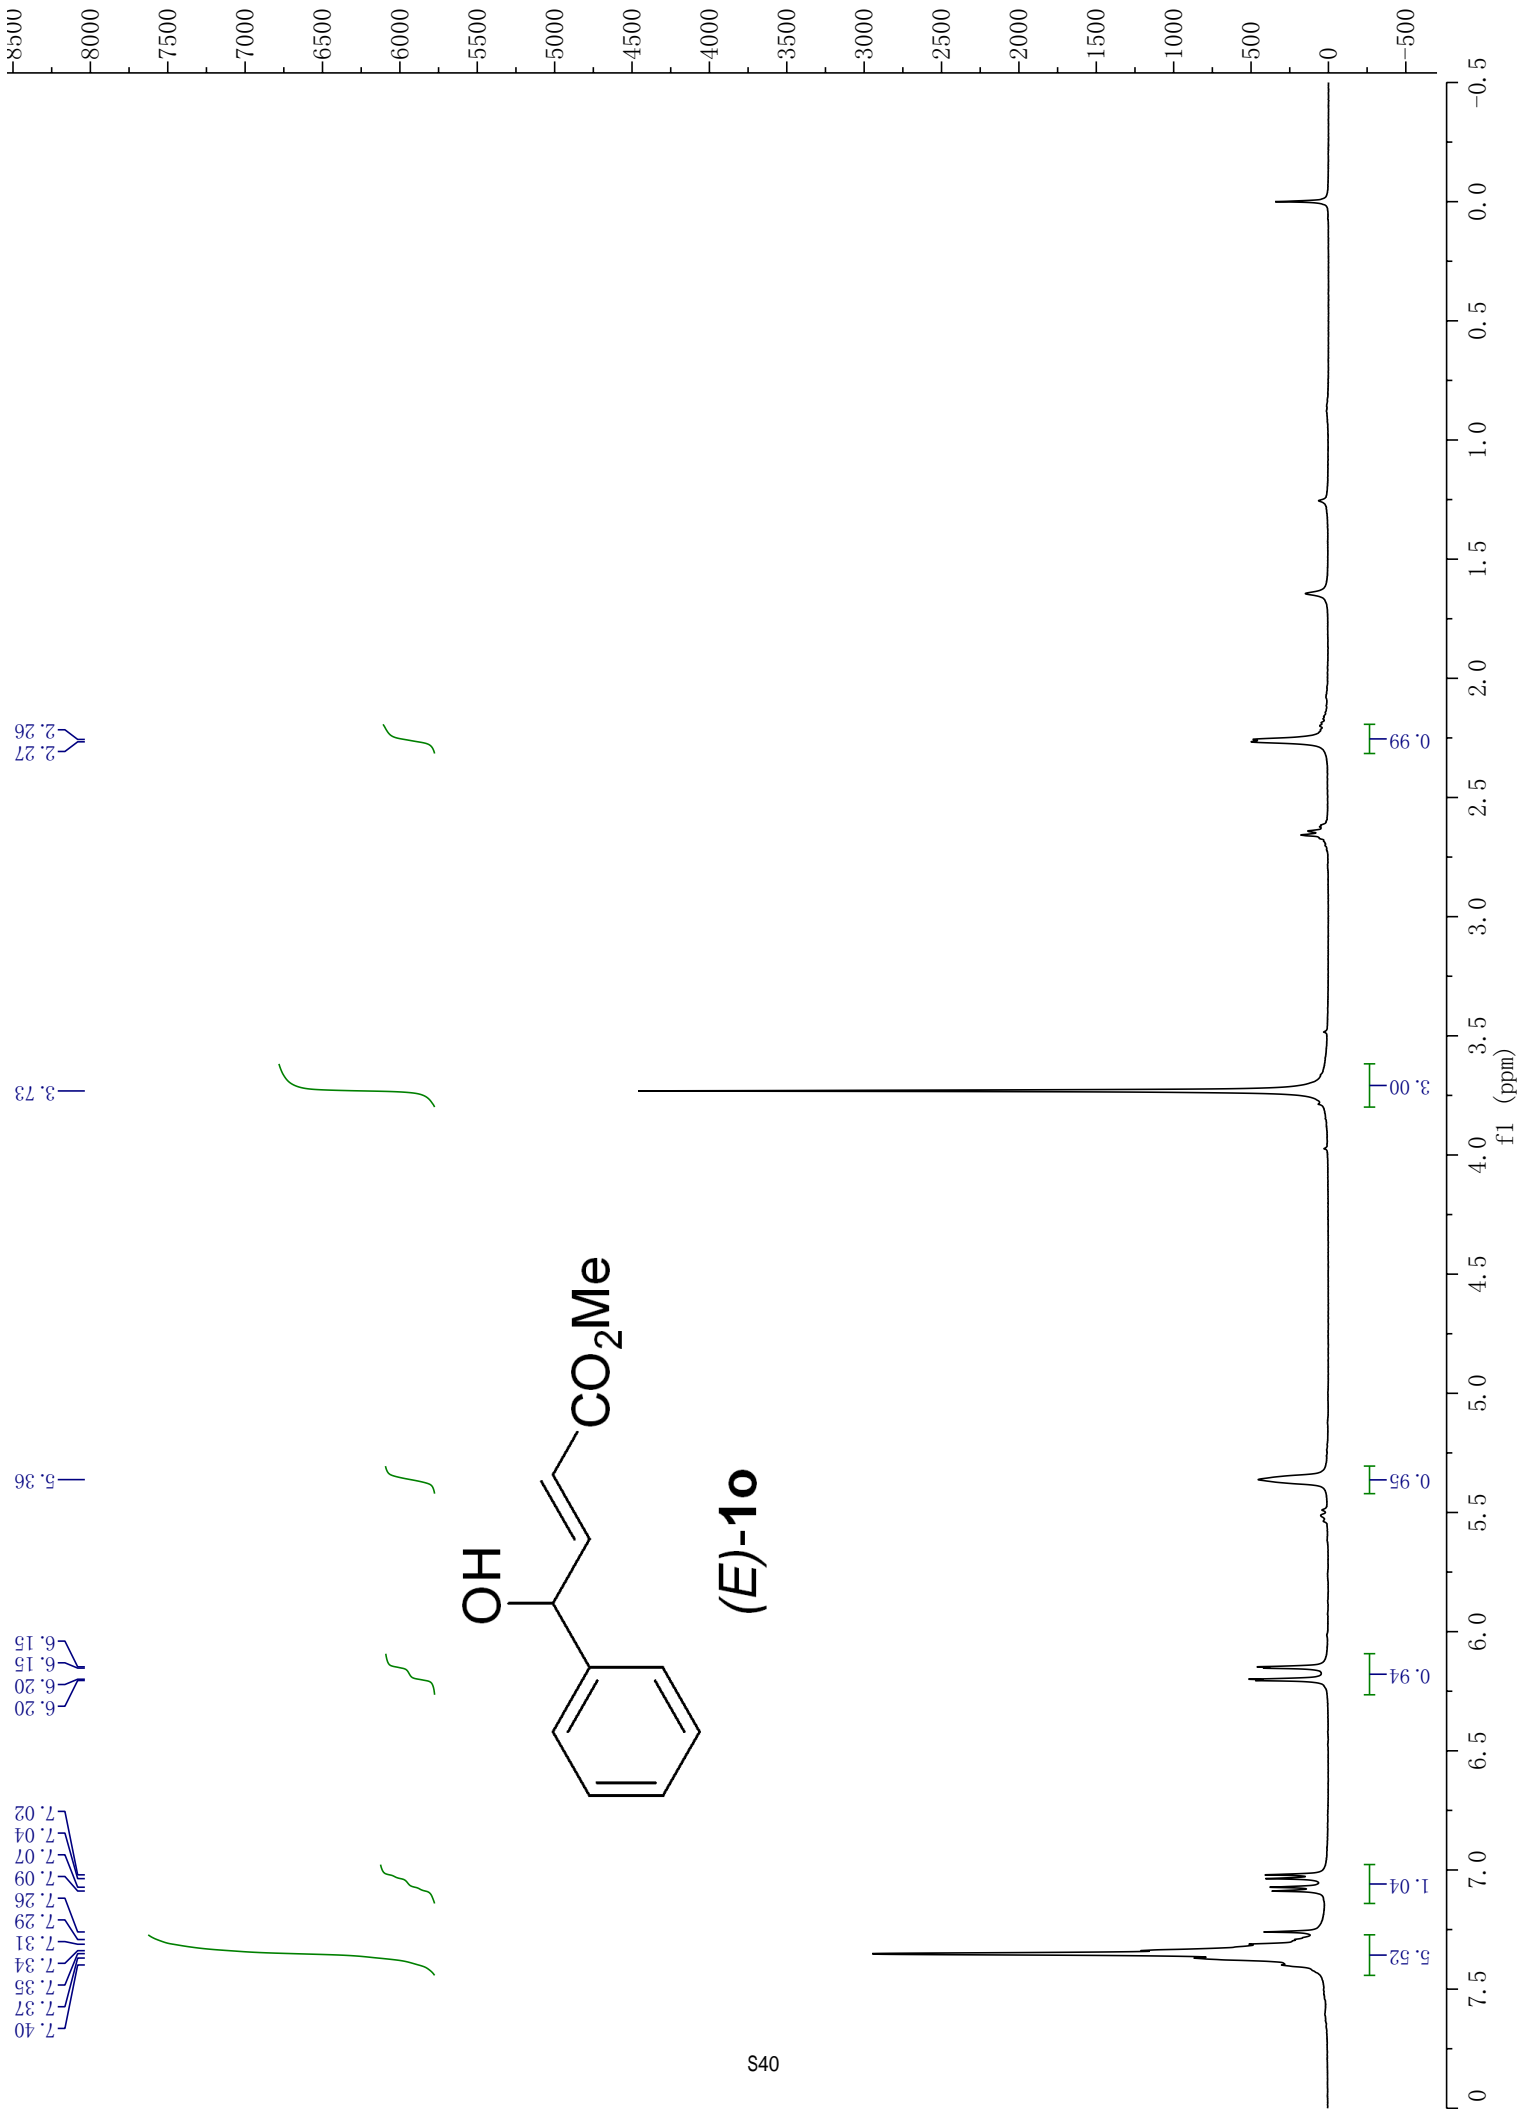



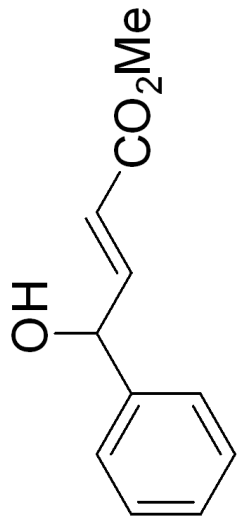

(E)-10

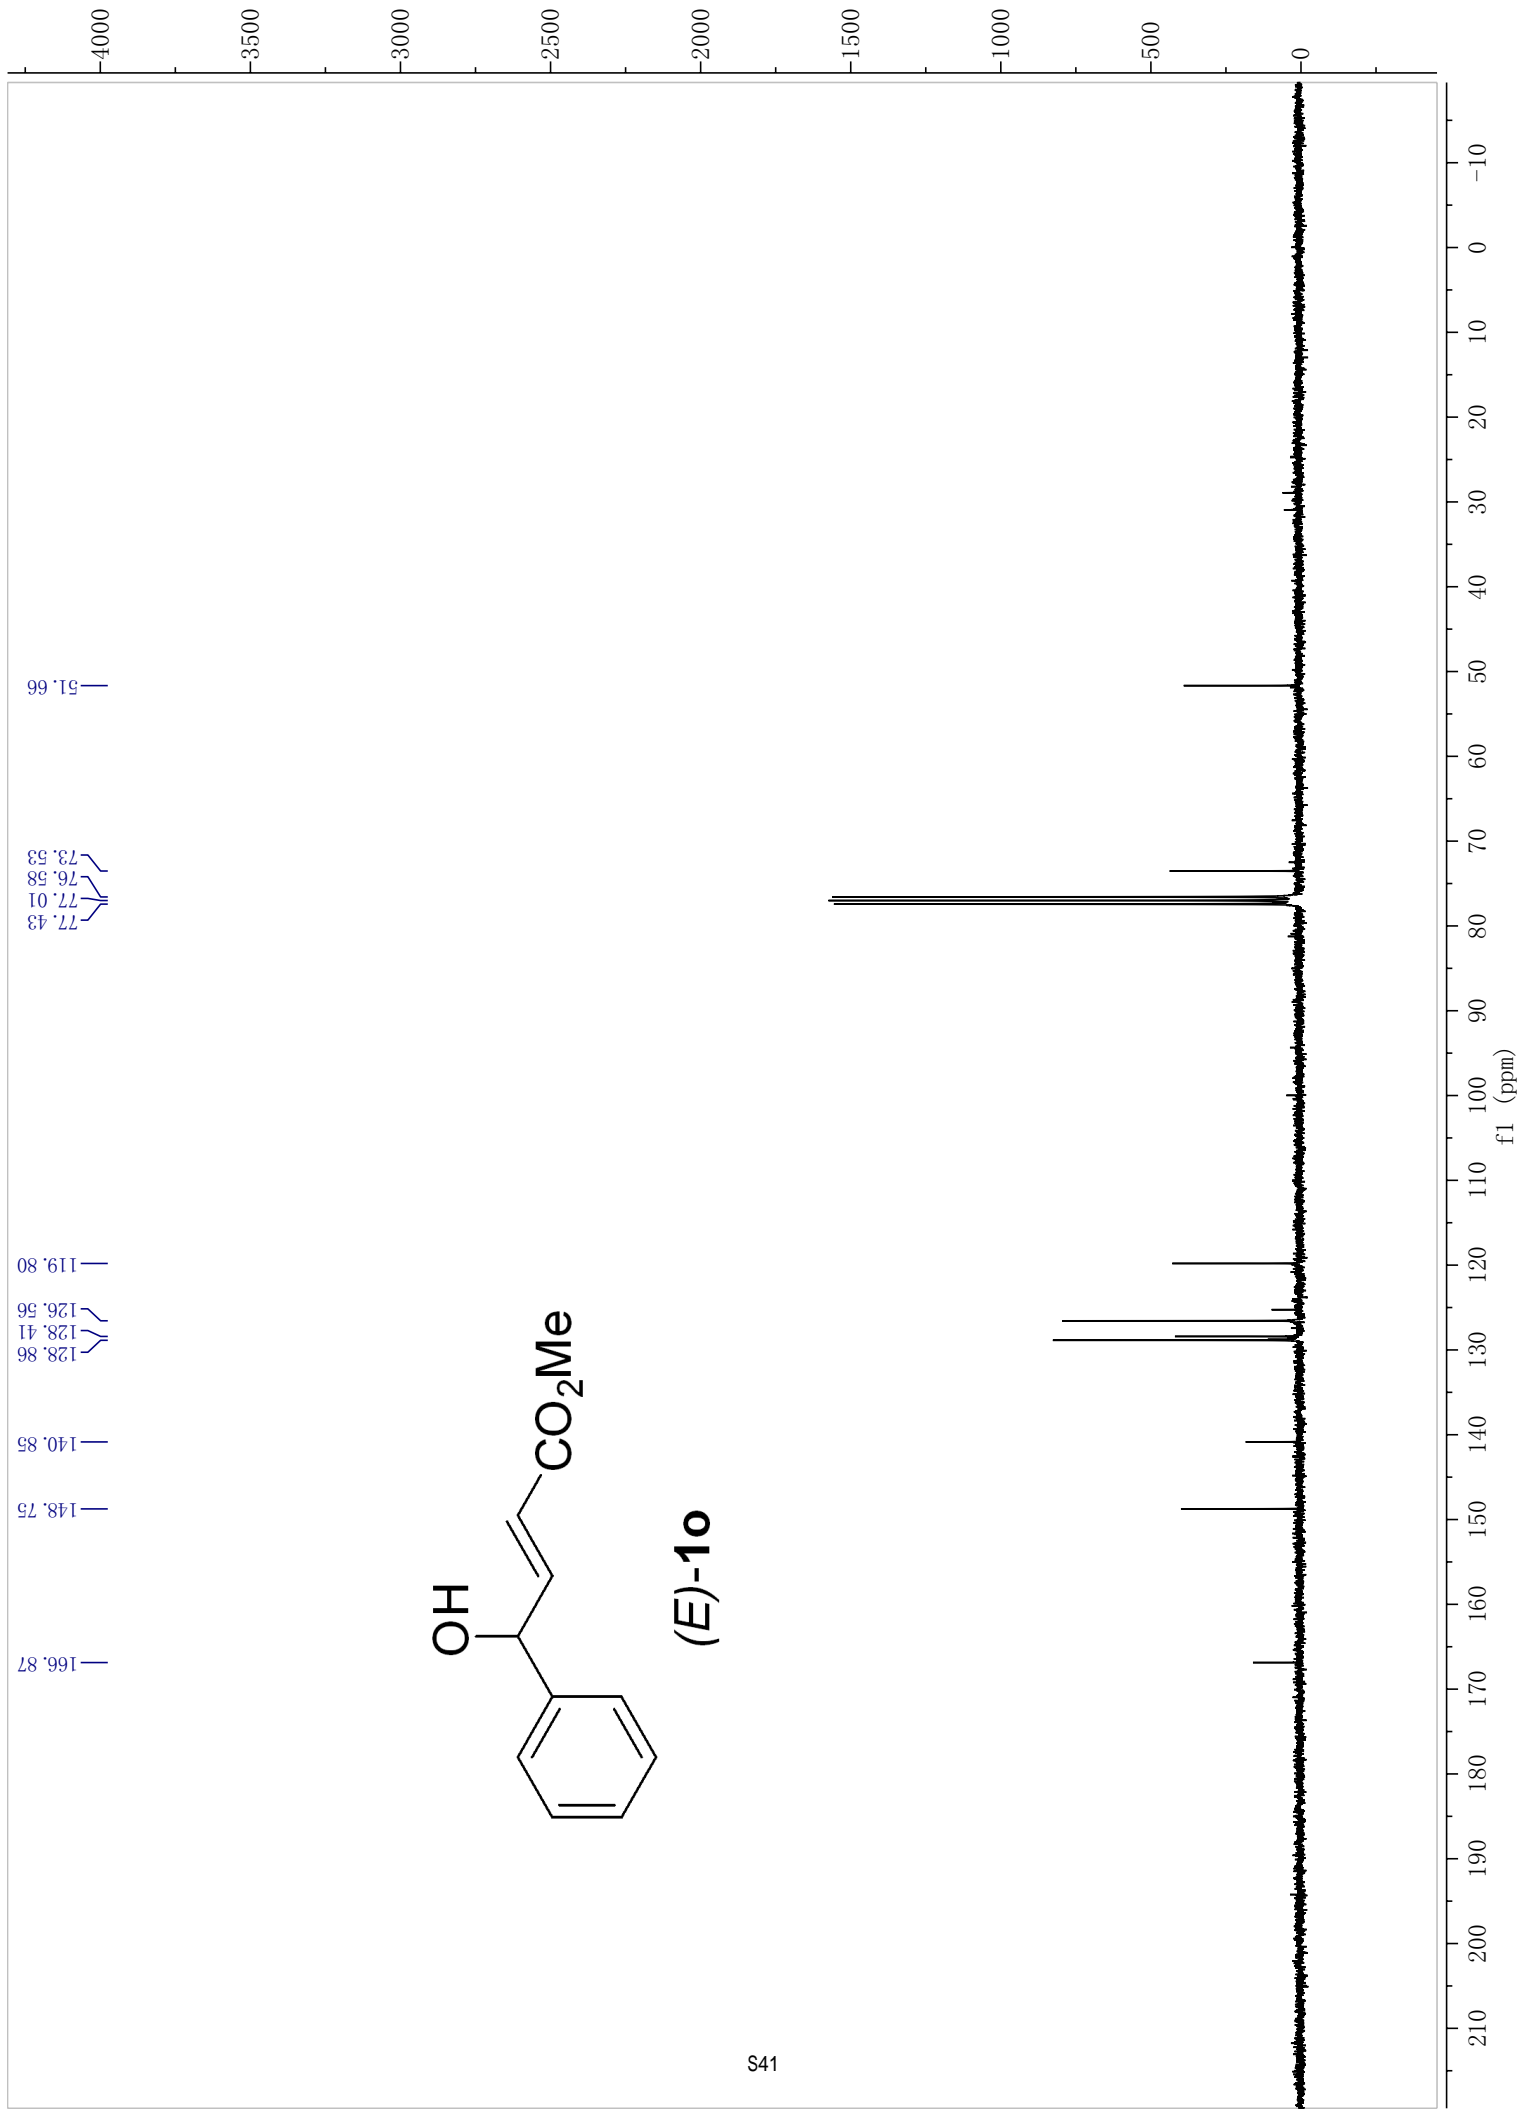

7.31  
7.31  
7.31  
7.30  
7.29  
7.28  
7.28  
7.27  
7.26  
7.24  
7.23  
7.23  
7.22  
7.21  
7.20  
7.19

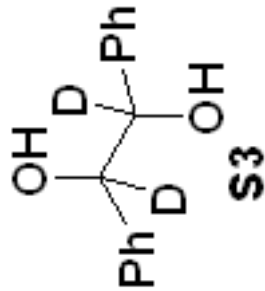

```

NAME      zhoujw1606
EXPNO     8
PROCNO    1
Date_     20160602
Time      19.56
INSTRUM   spect
PROBHD    5 mm PABBO BB-
PULPROG   zg30
TD         65536
SOLVENT   CDCl3
NS         8
DS         2
SWH        6188.119 Hz
FIDRES     0.094423 Hz
AQ         5.2953587 sec
RG         128
DW         80.800 usec
DE         6.50 usec
TE         291.8 K
D1         1.00000000 sec
TD0        1

===== CHANNEL f1 =====
NUC1       1H
P1         11.80 usec
PL1        0.00 dB
PL1W       11.55467796 W
SFO1       300.1318534 MHz
SI         32768
SF         300.1300075 MHz
WDW        EM
SSB        0
LB         0.30 Hz
GB         0
PC         1.00
  
```

2.95  
2.30  
0.00

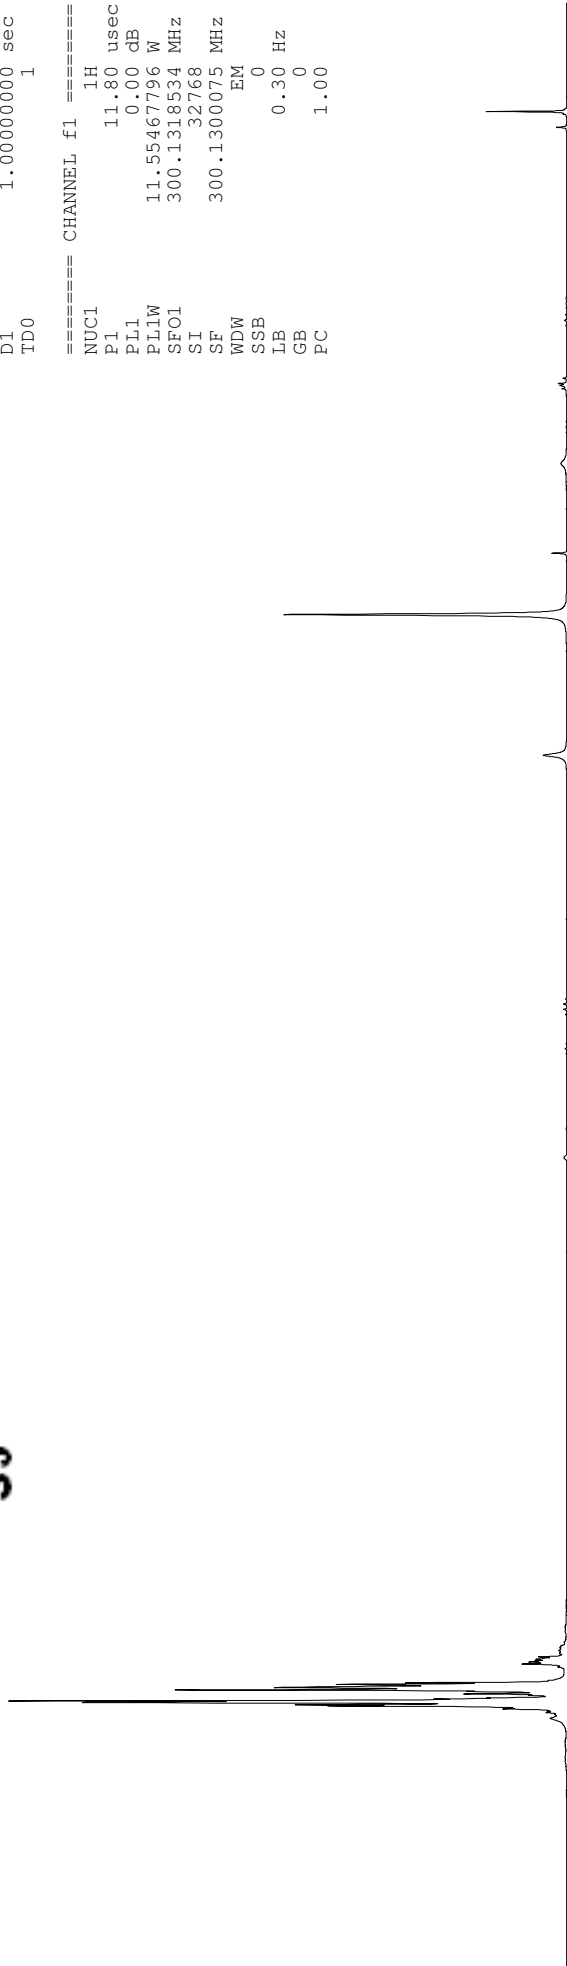

8.0 7.5 7.0 6.5 6.0 5.5 5.0 4.5 4.0 3.5 3.0 2.5 2.0 1.5 1.0 0.5 0.0 ppm

4.50  
0.31  
2.00

139.62  
128.17  
128.08  
128.04  
127.87  
127.87  
127.03  
126.88

77.42  
77.00  
76.58

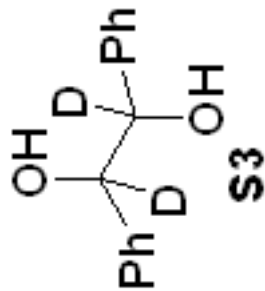

```

NAME      zhoujwi606
EXPNO     9
PROCNO    1
Date_     20160602
Time      20.17
INSTRUM   spect
PROBHD    5 mm PABBO BB-
PULPROG   zgpg30
TD         65536
SOLVENT   CDCl3
NS         356
DS         4
SWH        18028.846 Hz
FIDRES     0.275098 Hz
AQ         1.8175818 sec
RG         203
DW         27.733 usec
DE         6.50 usec
TE         282.6 K
D1         2.0000000 sec
D11        0.0300000 sec
TD0        1

===== CHANNEL f1 =====
NUC1       13C
P1         9.70 usec
PL1        0.00 dB
PL1W       29.38907051 W
SFO1       75.4752953 MHz

===== CHANNEL f2 =====
CPDPRG2    waltz16
NUC2       1H
PCPD2      80.00 usec
PL2        1.00 dB
PL12       17.00 dB
PL13       17.00 dB
PL1W       9.17820644 W
PL12W      0.23054613 W
PL13W      0.23054613 W
SFO2       300.1312005 MHz
SI         32768
SF         75.4677526 MHz
WDW        EM
SSB        0
LB         1.00 Hz
GB         0
PC         1.40
  
```

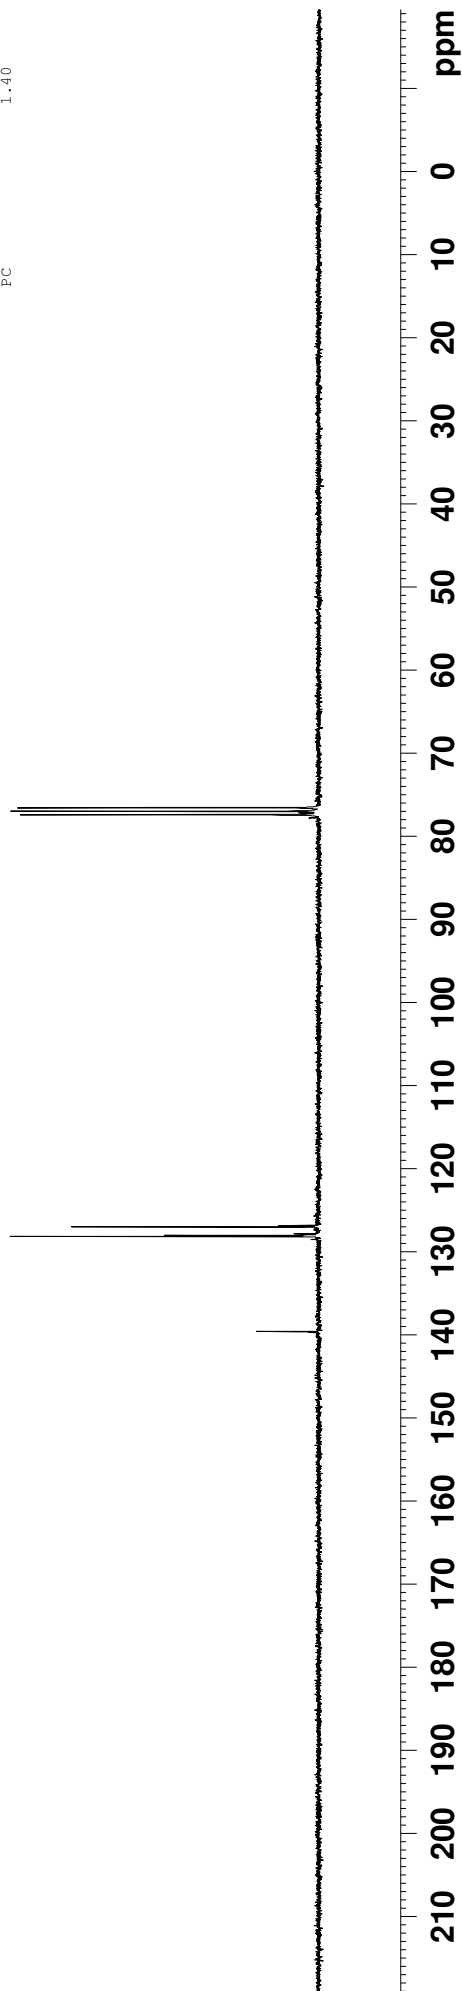

7.49  
7.48  
7.48  
7.48  
7.47  
7.47  
7.46  
7.41  
7.40  
7.38  
7.37  
7.36  
7.36  
7.36  
7.36  
7.34  
7.32  
7.32  
7.32  
7.32  
7.31

3.76  
3.62

0.01

```

NAME      zhoujw1606
EXPNO     11
PROCNO    1
Date_     20160603
Time      19.21
INSTRUM   spect
PROBHD    5 mm PABBO BB-
PULPROG   zg30
TD         65536
SOLVENT   CDCl3
NS         4
DS         0
SWH       6188.119 Hz
FIDRES    0.094423 Hz
AQ        5.2953587 sec
RG         36
DW        80.800 usec
DE        6.50 usec
TE        292.6 K
D1        1.00000000 sec
TD0       1
  
```

```

===== CHANNEL f1 =====
NUC1      1H
P1        11.80 usec
PL1       0.00 dB
PL1W      11.55467796 W
SF01      300.1318534 MHz
SI        32768
SF        300.1300000 MHz
WDW       EM
SSB       0
LB        0.30 Hz
GB        0
PC        1.00
  
```

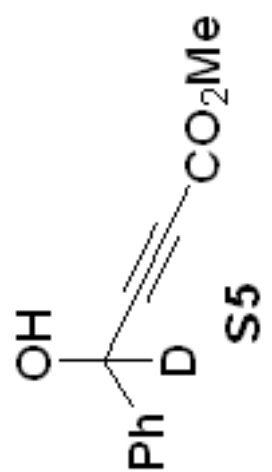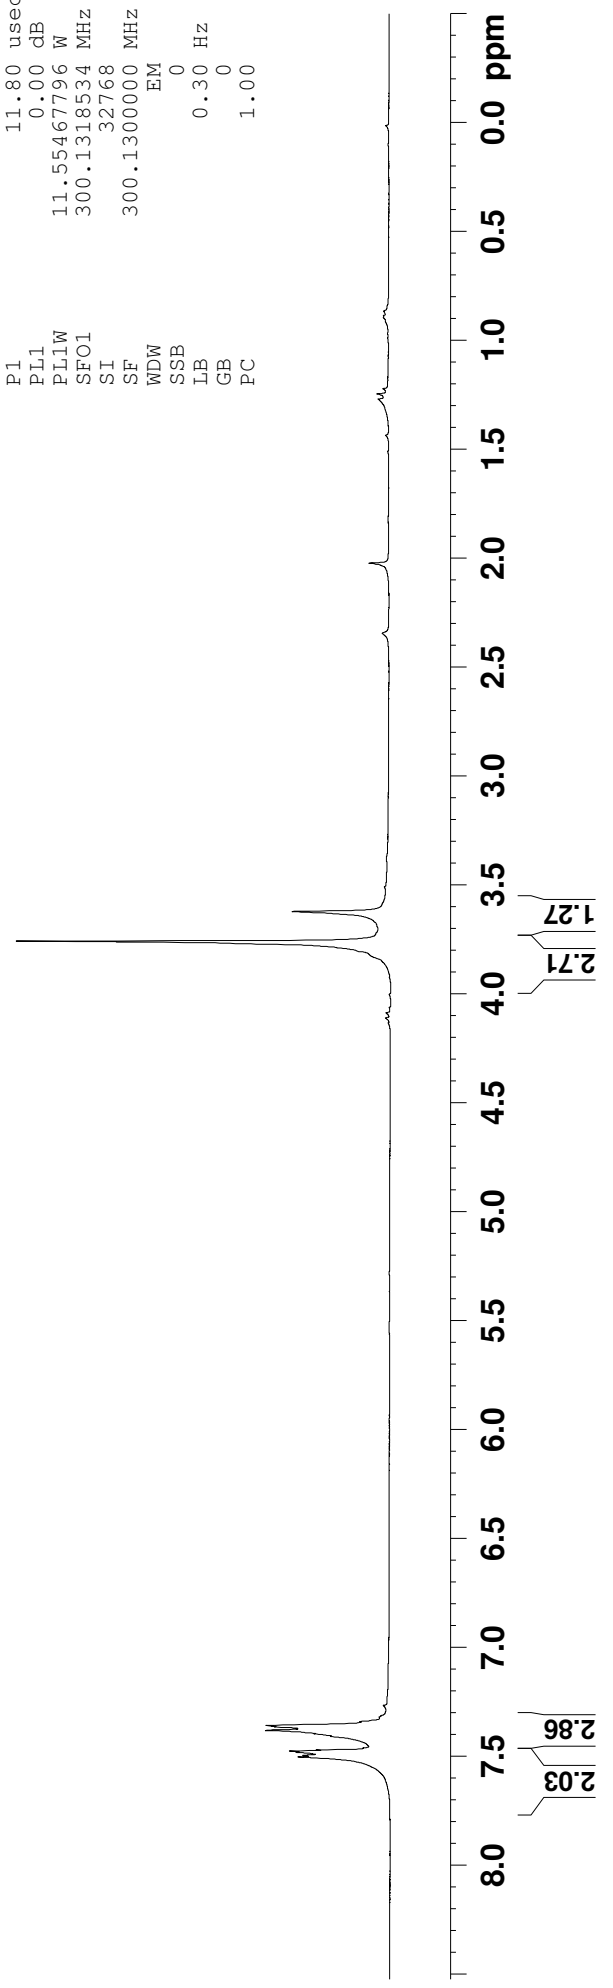

153.84  
138.35  
128.73  
128.68  
126.57

86.82  
77.42  
77.24  
77.00  
76.57  
63.99  
63.61  
63.31  
52.84

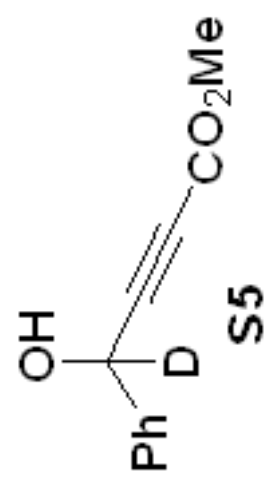

NAME zhoujw1606  
EXPNO 12  
PROCNO 1  
Date\_ 20160603  
Time 19.27  
INSTRUM spect  
PROBHD 5 mm PABBO BB-  
PULPROG zgpg30  
TD 65536  
SOLVENT CDC13  
NS 197  
DS 0  
SWH 18028.846 Hz  
FIDRES 0.275098 Hz  
AQ 1.8175818 sec  
RG 203  
DW 27.733 usec  
DE 6.50 usec  
TE 292.6 K  
D1 2.00000000 sec  
D11 0.03000000 sec  
TD0 1

==== CHANNEL f1 =====  
NUC1 13C  
P1 9.70 usec  
PL1 0.00 dB  
PL1W 29.38907051 W  
SFO1 75.4752953 MHz

==== CHANNEL f2 =====  
CPDPRG2 waltz16  
NUC2 1H  
PCPD2 80.00 usec  
PL2 1.00 dB  
PL12 17.00 dB  
PL13 17.00 dB  
PL2W 9.17820644 W  
PL12W 0.23054613 W  
PL13W 0.23054613 W  
SFO2 300.1312005 MHz  
SI 32768  
SF 75.4677597 MHz  
WDW EM  
SSB 0  
LB 1.00 Hz  
GB 0  
PC 1.40

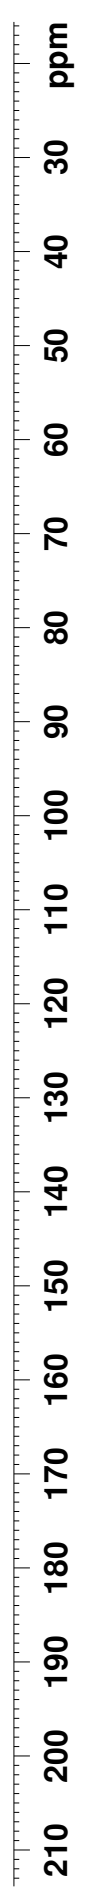

7.49  
7.48  
7.47  
7.46  
7.45  
7.39  
7.39  
7.38  
7.36  
7.35  
7.34  
7.32  
7.31  
7.31  
7.30  
7.29  
7.28  
7.26  
7.47  
6.43  
5.91  
5.87

3.77  
3.51  
3.49  
3.47  
3.44

1.23  
1.21  
1.18

0.07  
-0.00

zhoujw1606  
EXPNO 15  
PROCNO 1  
Date\_ 20160604  
Time 10.43  
INSTRUM spect  
PROBHD 5 mm PABBO BB-  
PULPROG zg30  
TD 65536  
SOLVENT CDCl3  
NS 8  
DS 2  
SWH 6188.119 Hz  
FIDRES 0.094423 Hz  
AQ 5.2953587 se  
RG 203  
DW 80.800 us  
DE 6.50 us  
TE 292.0 K  
D1 1.0000000 se  
TD0 1

==== CHANNEL f1 =====  
NUC1 1H  
P1 11.80 us  
PL1 0.00 dB  
PL1W 11.55467796 W  
SF01 300.1318534 MH  
SI 32768  
SF 300.1300026 MH  
EM  
SSB 0  
LB 0.30 Hz  
GB 0  
PC 1.00

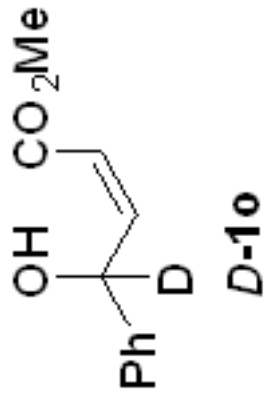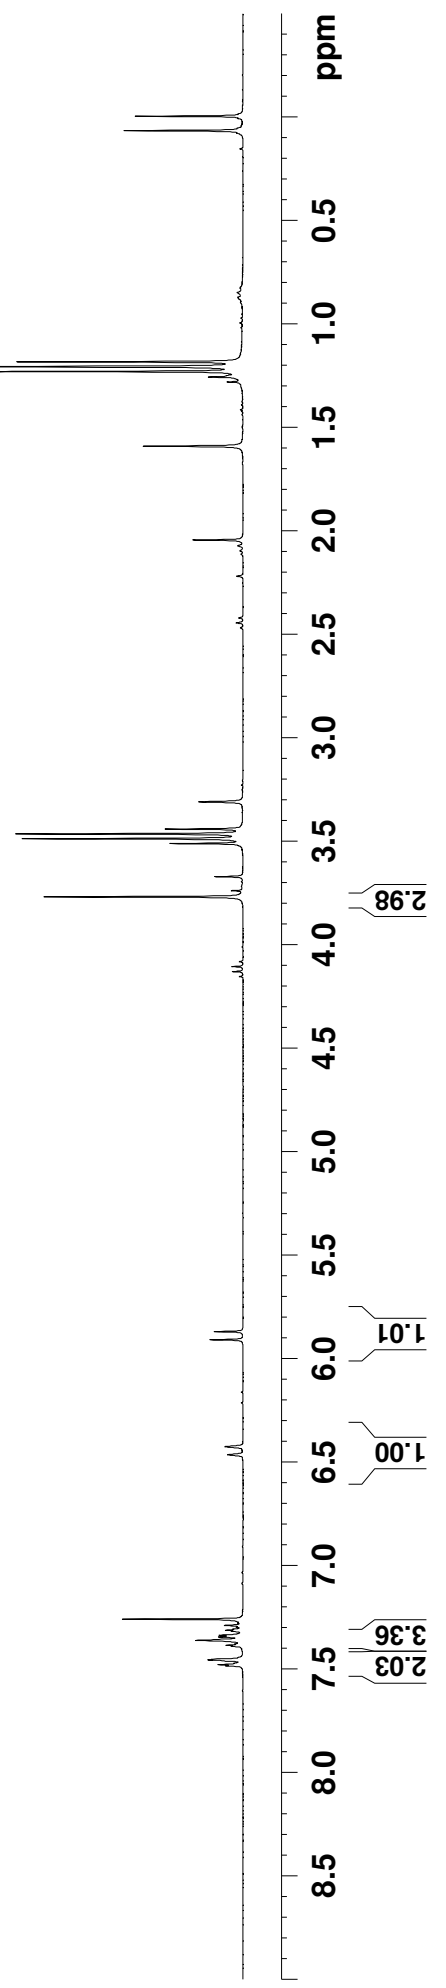

```

NAME      zhangj110.04.1/
EXPNO    2
PROCNO   1
Date_    20100417
Time     15.39
INSTRUM  spect
PROBHD   5 mm PABBO BB-
PULPROG  zg30
TD       65536
SOLVENT  CDCl3
NS       8
DS       2
SWH      6188.119 Hz
FIDRES   0.094423 Hz
AQ       5.2953587 sec
RG       181
DW       80.800 usec
DE       6.50 usec
TE       287.8 K
D1       1.00000000 sec
TD0      1
===== CHANNEL f1 =====
NUC1     1H
P1       11.80 usec
PL1     0.00 dB
PL1W    11.55467796 W
SF01    300.1318534 MHz
SI       32768
SF      300.1300020 MHz
WDW     EM
SSB     0
LB      0.30 Hz
GB      0
PC      1.00

```

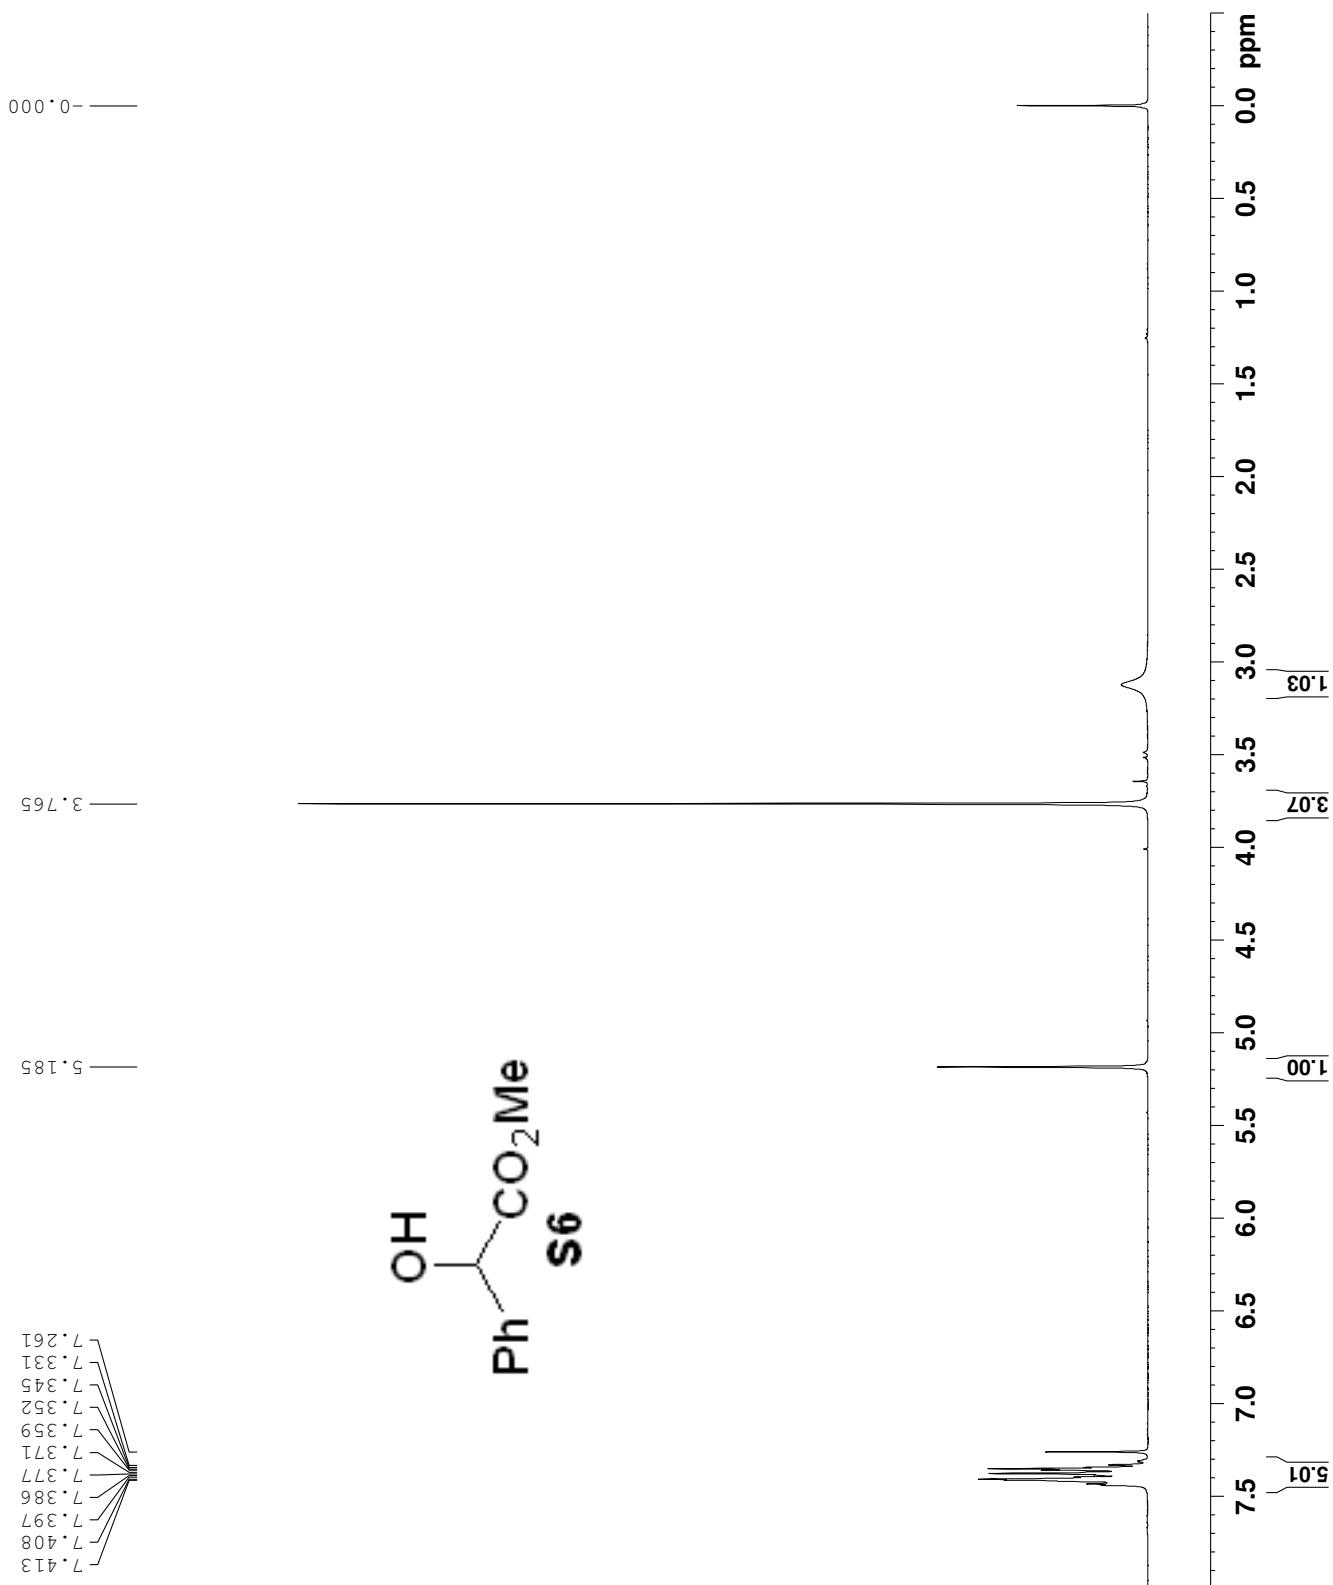

NAME zhangjl10.04.ly  
 EXPNO 4  
 PROCNO 1  
 Date\_ 20100419  
 Time 22.15  
 INSTRUM spect  
 PROBHD 5 mm PABBO BB-  
 PULPROG zg30  
 ID 65536  
 SOLVENT CDCl3  
 NS 8  
 DS 2  
 SWH 6188.119  
 FIDRES 0.094423  
 AQ 5.2953587  
 RG 161  
 DW 80.800  
 DE 6.50  
 TE 287.9  
 D1 1.00000000  
 TD0 1  
 ===== CHANNEL f1 =====  
 NUC1 1H  
 P1 11.80  
 PL1 0.00  
 PL1W 11.55467796  
 SFO1 300.1318534  
 SI 32768  
 SF 300.1300009  
 WDW EM  
 SSB 0  
 LB 0.30  
 GB 0  
 PC 1.00

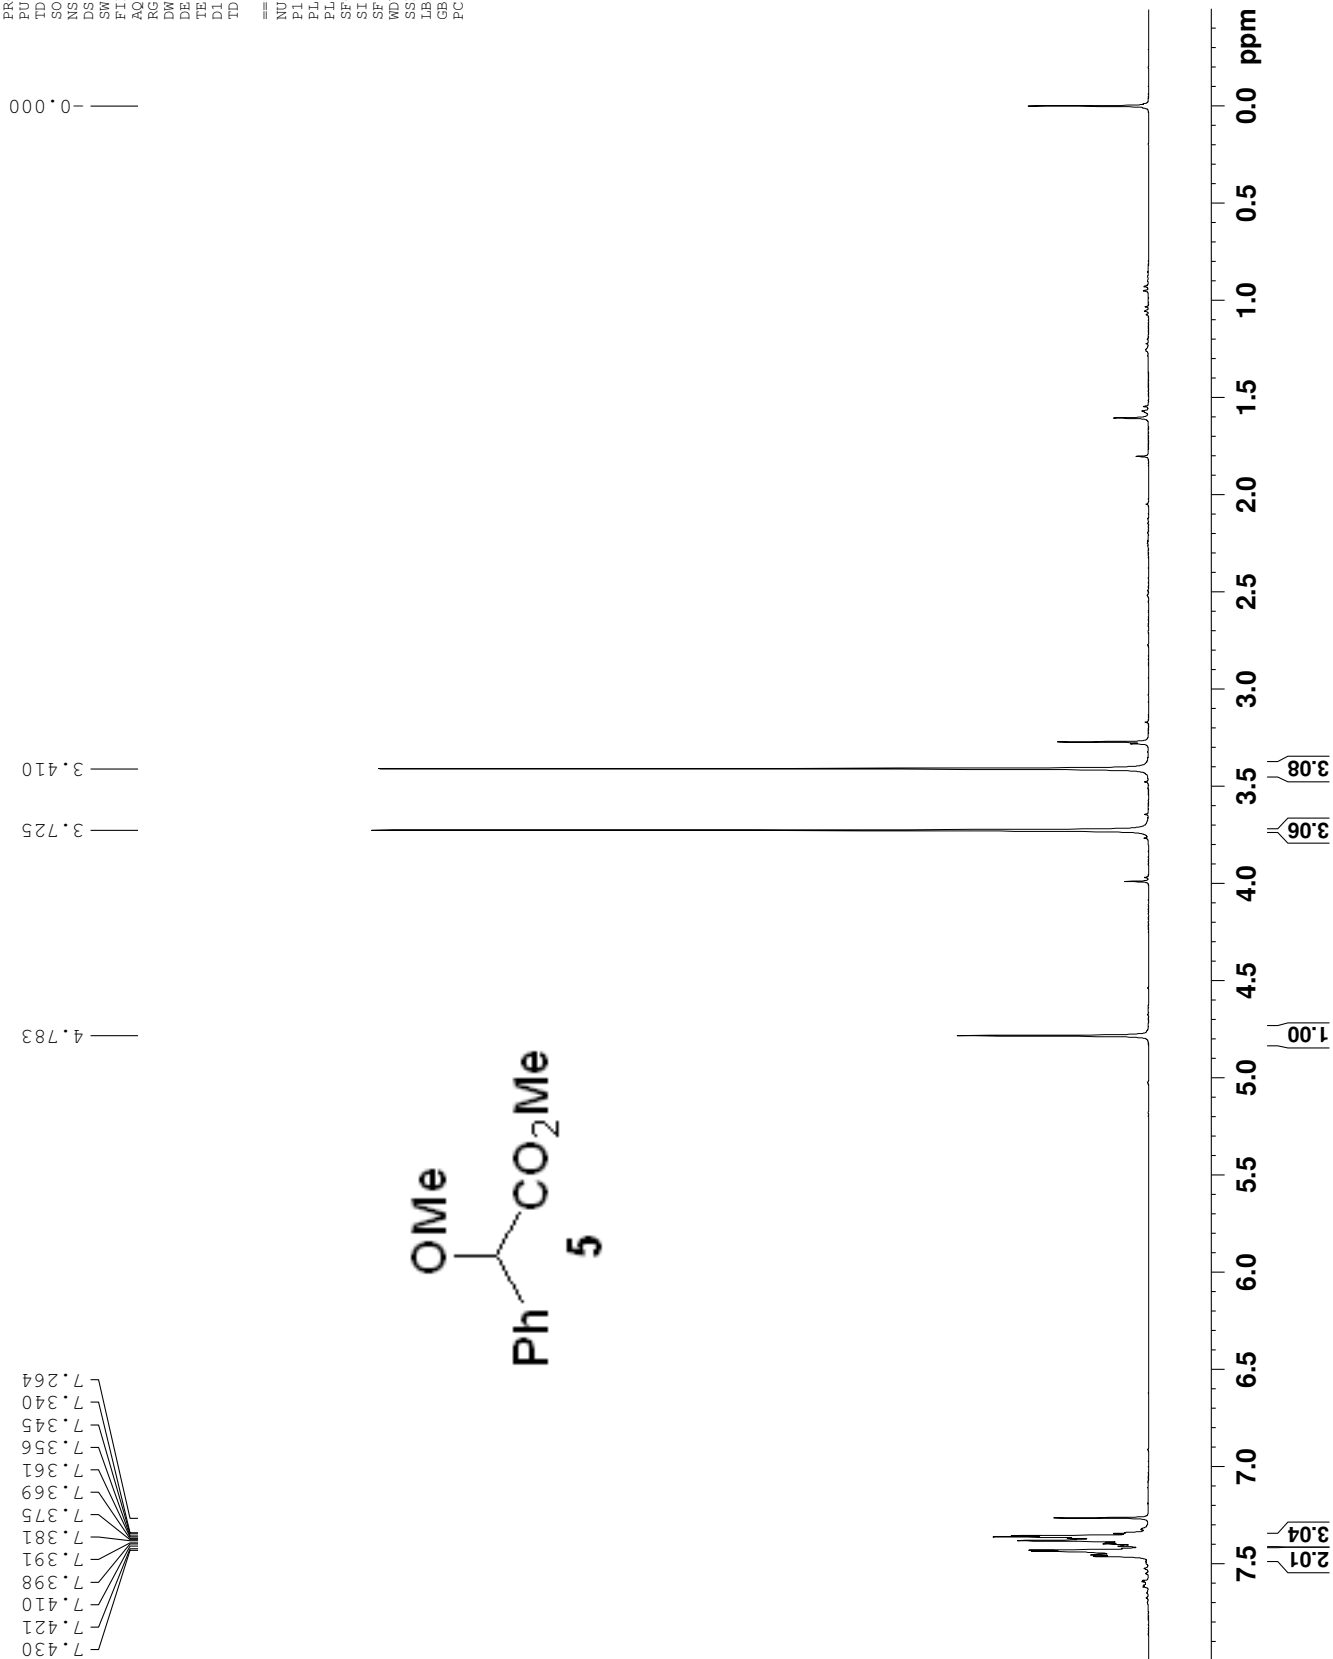



```

NAME      zhangj110.us.uj
EXPNO    6
PROCNO   1
Date_    20100507
Time     22.07
INSTRUM  spect
PROBHD   5 mm PABBO BB-
PULPROG  zg30
TD        65536
SOLVENT  CDCl3
NS        8
DS        2
SWH       6188.119 Hz
FIDRES   0.094423 Hz
AQ        5.2953587 sec
RG        14.2
DW        80.800 usec
DE        6.50 usec
TE        289.7 K
D1        1.00000000 sec
TD0       1
===== CHANNEL f1 =====
NUC1      1H
P1        11.80 usec
PL1       0.00 dB
PL1W      11.55467796 W
SF01      300.1318534 MHz
SI        32768
SF        300.1300101 MHz
WDW       EM
SSB       0
LB        0.30 Hz
GB        0
PC        1.00

```

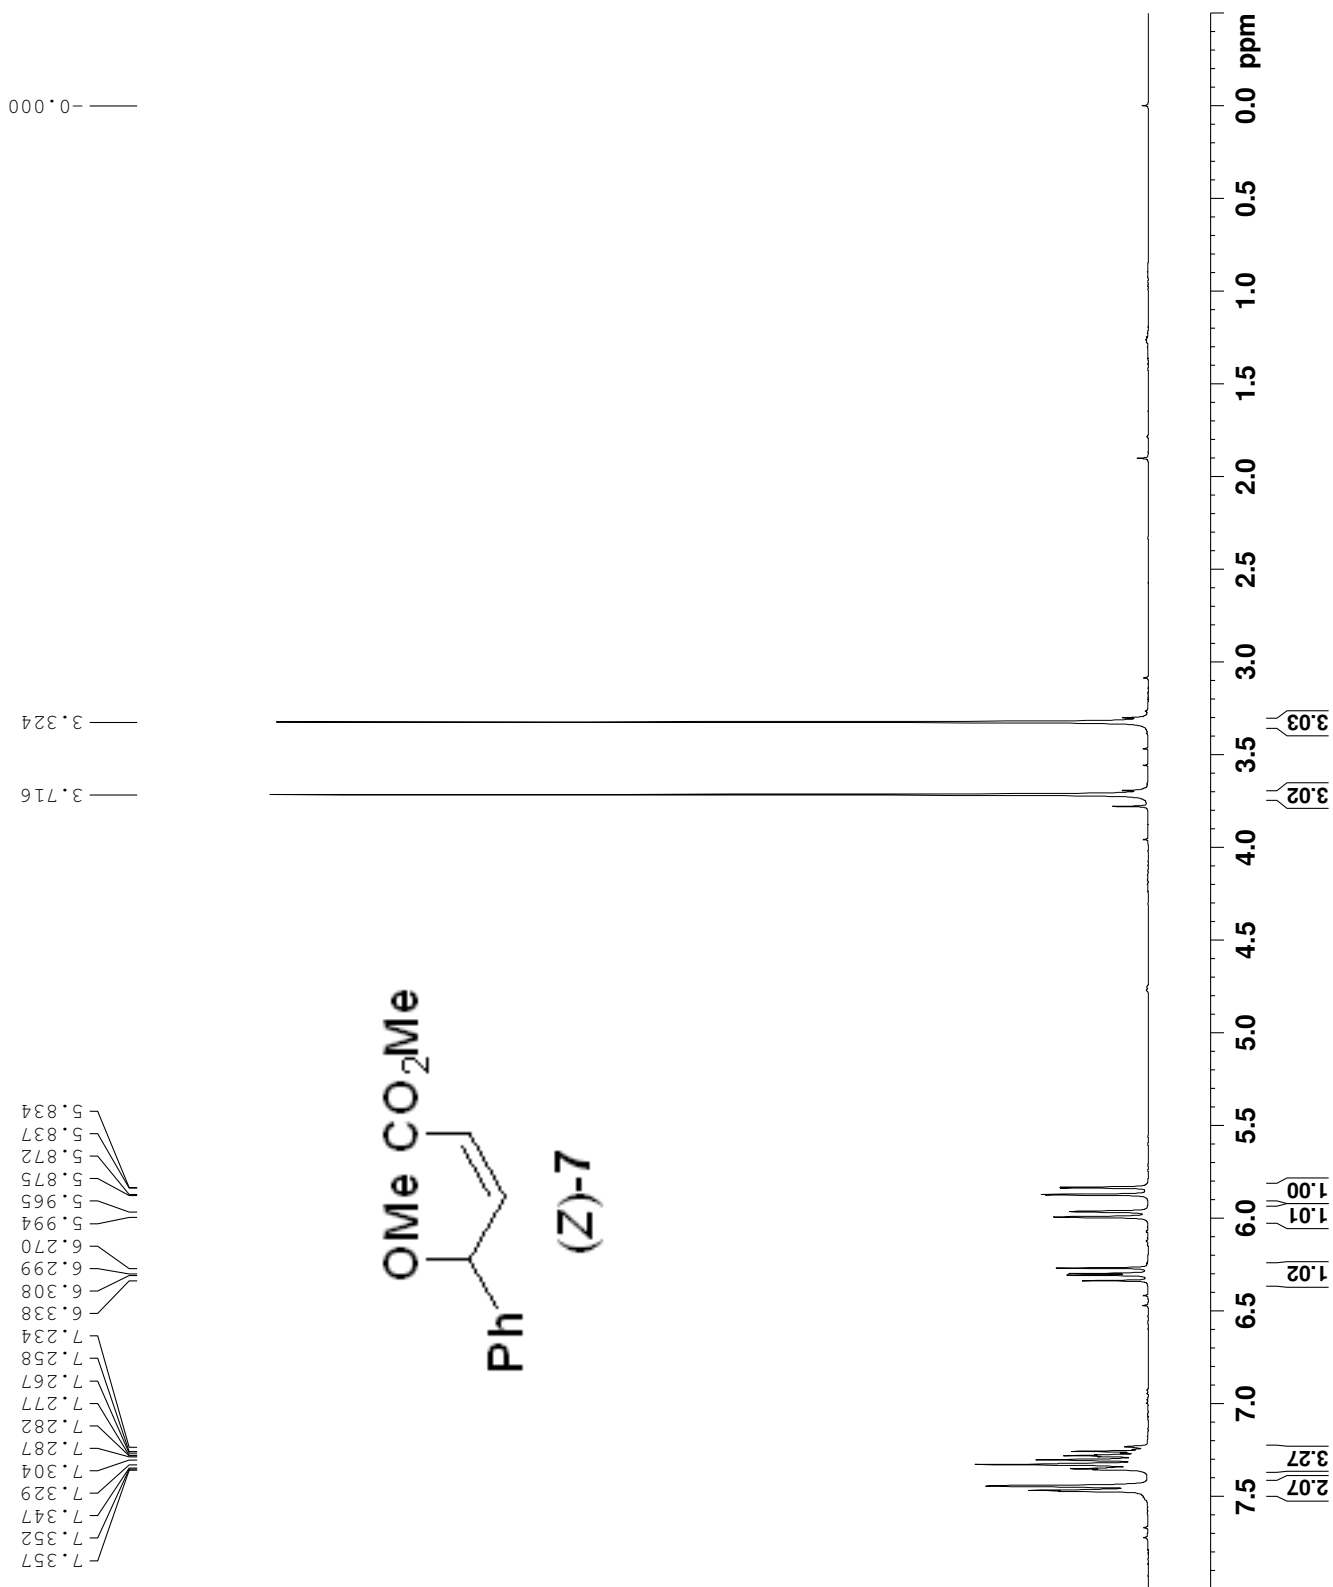

```

NAME      zhangj110.05.07
EXPNO     1
PROCNO    1
Date_     20100507
Time      22.12
INSTRUM   spect
PROBHD    5 mm PABBO BB-
PULPROG   zgpg30
TD         65536
SOLVENT   CDCl3
NS         40
DS         4
SWH        18028.846 Hz
FIDRES     0.275098 Hz
AQ         1.8175818 sec
RG         203
DM         27.733 usec
DE         6.50 usec
TE         290.4 K
D1         2.0000000 sec
D11        0.0300000 sec
TD0        1

===== CHANNEL f1 =====
NUC1       13C
P1         9.70 usec
PL1        0.00 dB
PL1W       29.38907051 W
SFO1       75.4752953 MHz

===== CHANNEL f2 =====
CPDPRG2   waitz16
NUC2       1H
PCPD2     80.00 usec
PL2        1.00 dB
PL2W       17.00 dB
PL12       17.00 dB
PL13       17.00 dB
PL12W      9.17820644 W
PL13W      0.23054613 W
SFO2       300.1312005 MHz
SI         32768
SF         75.4677619 MHz
WDW        EM
SSB        0
LB         1.00 Hz
GB         0
PC         1.40

```

51.22  
56.20  
76.57  
77.00  
77.42  
77.90

119.27  
126.72  
127.78  
128.37  
140.11  
148.99  
166.13

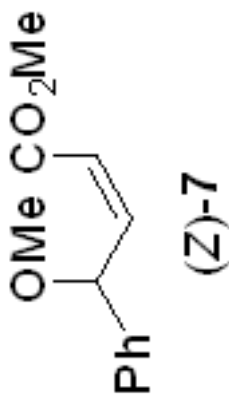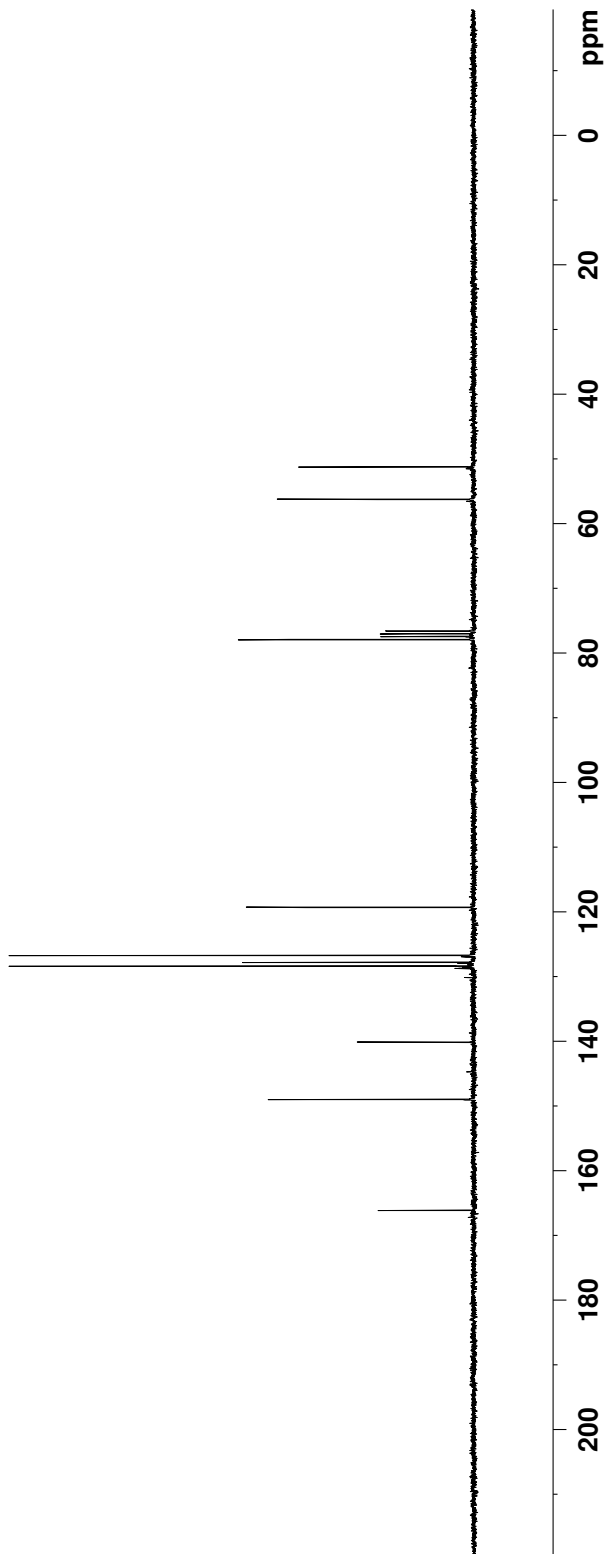

```

NAME      zhangj110.us.u/
EXPNO     11
PROCNO    1
Date_     20100507
Time      22.33
INSTRUM   spect
PROBHD    5 mm PABBO BB-
PULPROG   zg30
TD         65536
SOLVENT   CDCl3
NS         8
DS         2
SWH        6188.119 Hz
FIDRES     0.094423 Hz
AQ          5.2953587 sec
RG          20.2
DW          80.800 usec
DE          6.50 usec
TE          289.8 K
D1         1.00000000 sec
TD0        1
===== CHANNEL f1 =====
NUC1       1H
P1         11.80 usec
PL1        0.00 dB
PL1W       11.55467796 W
SF01       300.1318534 MHz
SI         32768
SF         300.1300035 MHz
EM         0
SSB        0
LB         0.30 Hz
GB         0
PC         1.00

```

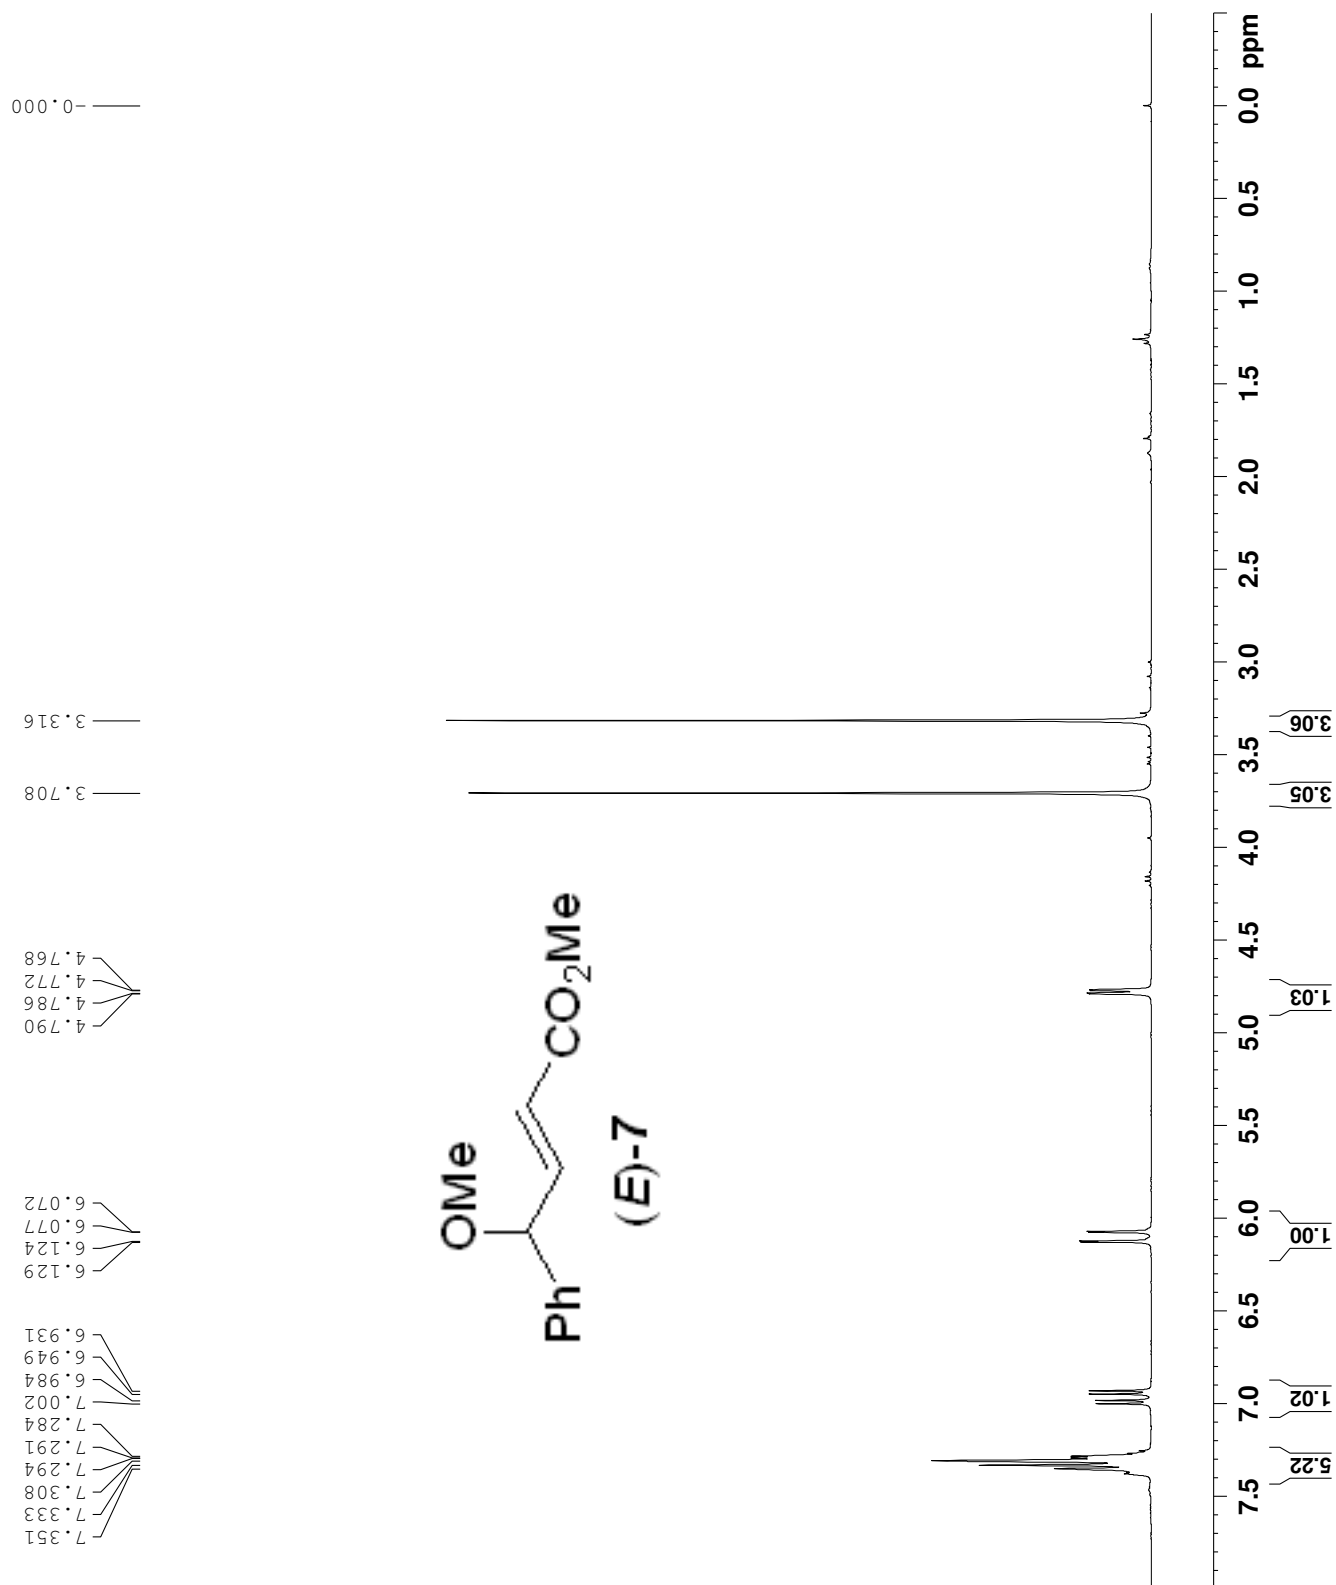

```

NAME      zhangj110.05.07
EXPNO     12
PROCNO    1
Date_     20100507
Time_     22.38
INSTRUM   spect
PROBHD    5 mm PABBO BB-
PULPROG   zgpg30
TD         65536
SOLVENT   CDCl3
NS         53
DS         4
SWH        18028.846 Hz
FIDRES     0.275098 Hz
AQ          1.8175818 sec
RG          203
DW          27.733 usec
DE          6.50 usec
TE          290.6 K
D1          2.0000000 sec
D11         0.0300000 sec
TD0         1

===== CHANNEL f1 =====
NUC1       13C
P1          9.70 usec
PL1         0.00 dB
PL1W        29.38907051 W
SFO1        75.4752953 MHz

===== CHANNEL f2 =====
CPDPRG2    waitz16
NUC2       1H
PCPD2      80.00 usec
PL2         1.00 dB
PL2W        17.00 dB
PL13        17.00 dB
PL12W       17.00 dB
PL12        9.17820644 W
PL12W       0.23054613 W
PL13W       0.23054613 W
SFO2        300.1312005 MHz
SI          32768
SF          75.4677579 MHz
WDW         EM
SSB         0
LB          1.00 Hz
GB          0
PC          1.40

```

51.60  
56.72  
76.69  
77.12  
77.54  
82.43

120.41  
127.10  
128.31  
128.56  
128.74  
138.83  
147.25  
147.59  
166.72

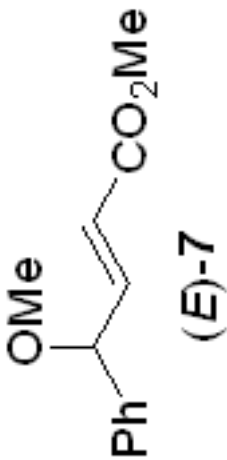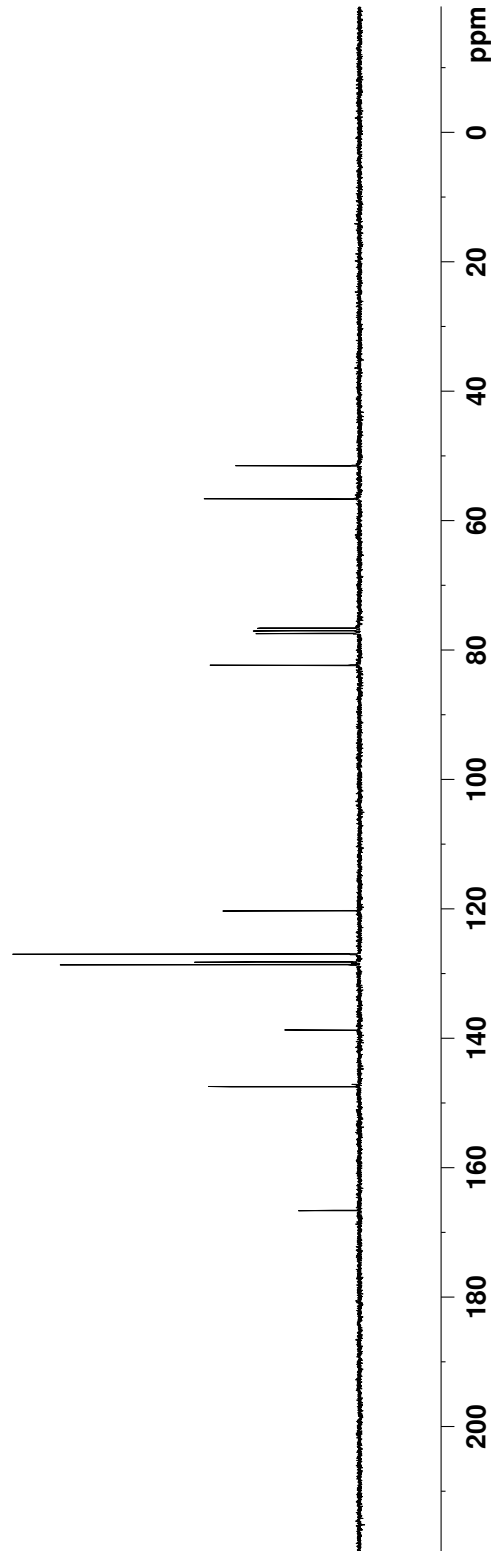

```

NAME          1anuv1z6
EXPNO         1
PROCNO        1
Date_         20091226
Time          16.05
INSTRUM       spect
PROBHD        5 mm PABBO BB-
PULPROG       zg30
TD            65536
SOLVENT       CDCl3
NS            8
DS            2
SWH           6188.119 Hz
FIDRES       0.094423 Hz
AQ           5.2953587 sec
RG           128
DW           80.800 usec
DE           6.50 usec
TE           291.2 K
D1           1.00000000 sec
TD0          1

===== CHANNEL f1 =====
NUC1          1H
P1           11.80 usec
PL1          0.00 dB
PL1W        11.55467796 W
SF01        300.1318534 MHz
SI          32768
SF          300.1300023 MHz
WDW          EM
SSB          0
LB          0.30 Hz
GB          0
PC          1.00

```

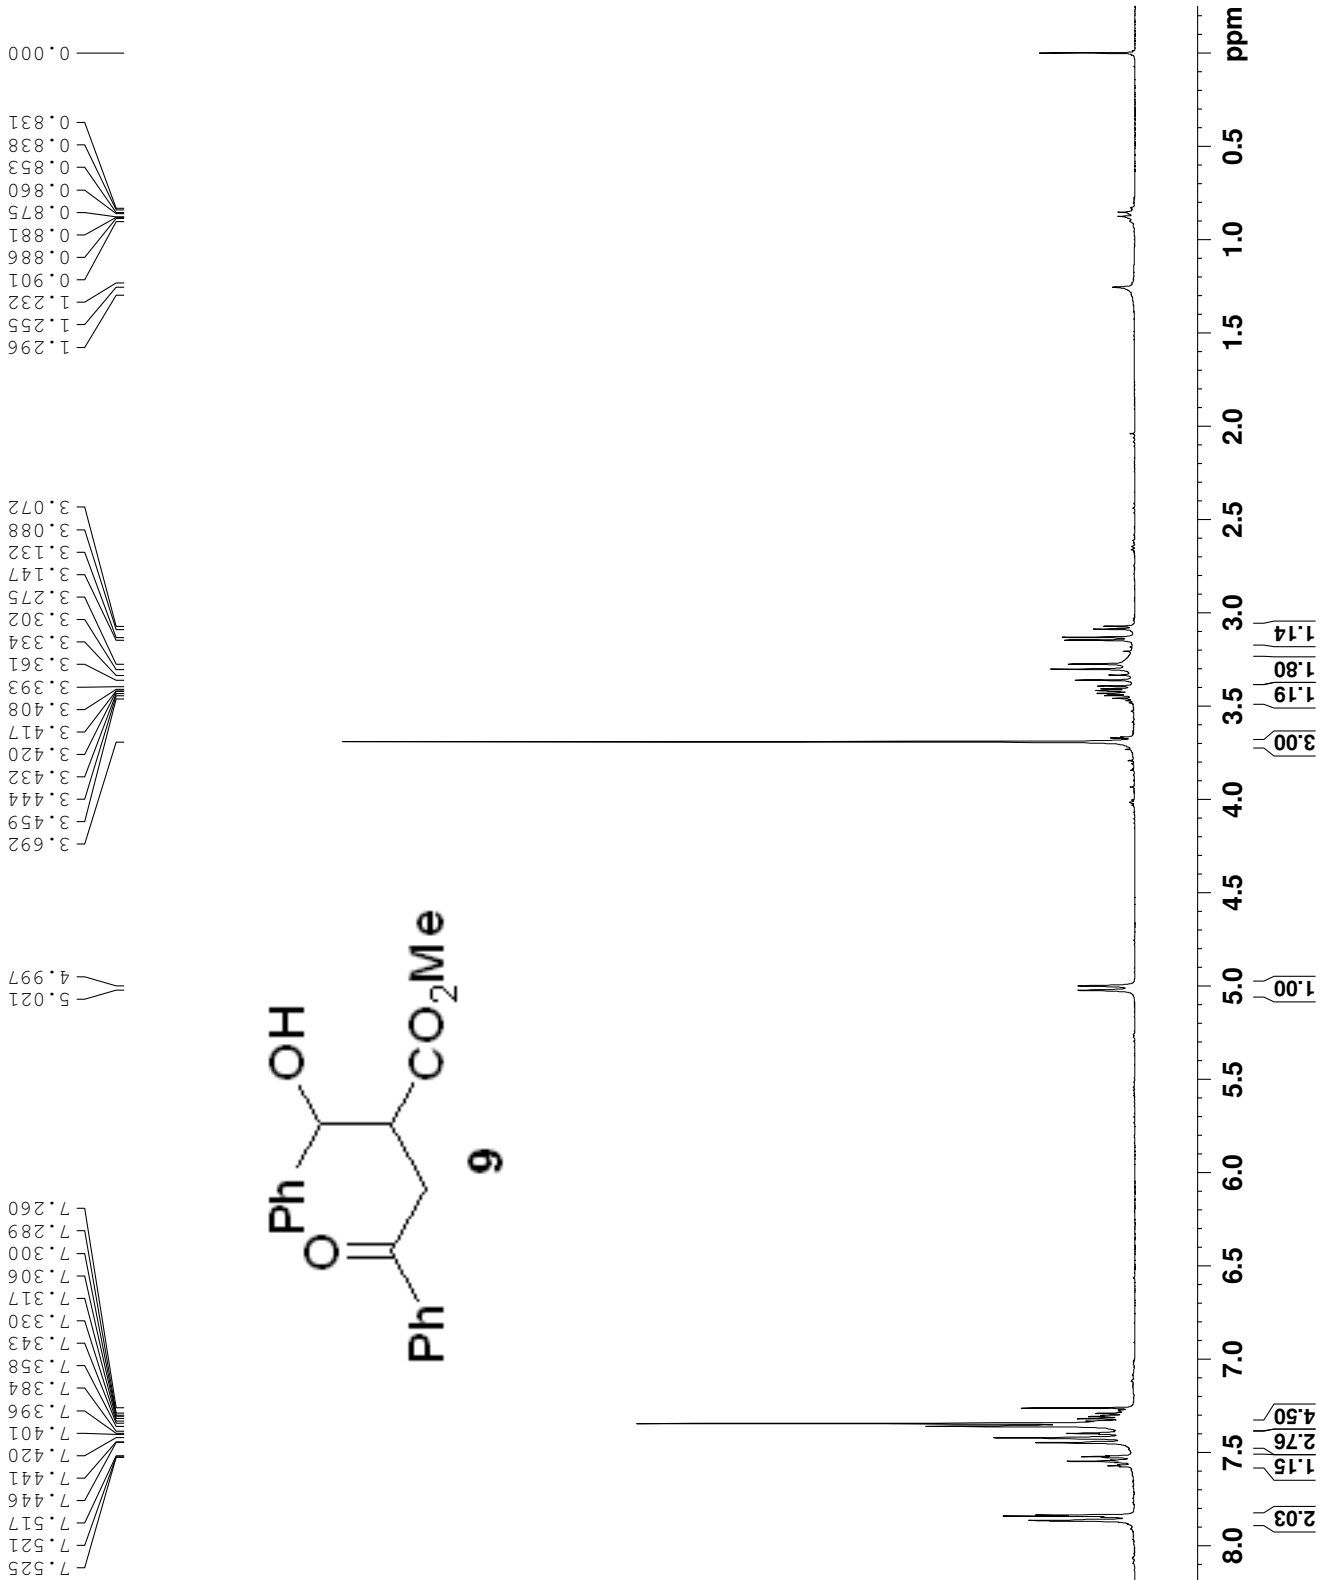

```

NAME          lan091226
EXPNO         2
PROCNO        1
Date_         20091226
Time_         16.33
INSTRUM       spect
PROBHD        5 mm PABBO BB-
PULPROG       zgpg30
TD            65536
SOLVENT       CDCl3
NS            321
DS            4
SWH           18028.846 Hz
FIDRES       0.275098 Hz
AQ           1.8175818 sec
RG           203
DW           27.733 usec
DE           6.50 usec
TE           292.2 K
D1           2.0000000 sec
D11          0.0300000 sec
TD0          1

===== CHANNEL f1 =====
NUC1          13C
P1           9.70 usec
PL1          0.00 dB
PL1W         29.38907051 W
SFO1         75.4752953 MHz

===== CHANNEL f2 =====
CPDPRG2       waitz16
NUC2          1H
PCPD2        80.00 usec
PL2          1.00 dB
PL2W         17.00 dB
PL13         17.00 dB
PL12W        9.17820644 W
PL12M        0.23854613 W
PL13W        0.23854613 W
SFO2         300.1312005 MHz
SI           32768
SF           75.4677490 MHz
WDW          EM
SSB          0
LB           1.00 Hz
GB           0
PC           1.40

```

37.78  
47.84  
52.14  
74.52  
76.60  
77.02  
77.45

126.29  
128.00  
128.22  
128.58  
128.63  
133.35  
136.30  
141.22

174.66  
197.60

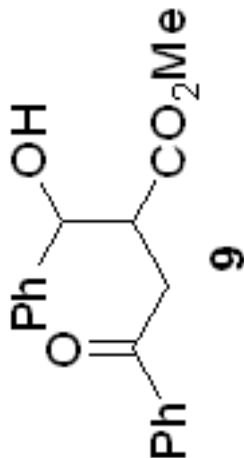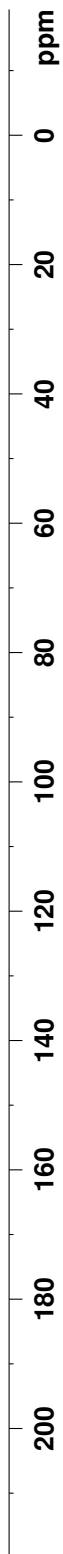

```

NAME          1anuy1z02
EXPNO         2
PROCNO        1
Date_         20091202
Time          15.12
INSTRUM       spect
PROBHD        5 mm PABBO BB-
PULPROG       zg30
TD            65536
SOLVENT       CDCl3
NS            8
DS            2
SWH           6188.119 Hz
FIDRES        0.094423 Hz
AQ            5.2953587 sec
RG            161
DW            80.800 usec
DE            6.50 usec
TE            289.2 K
D1            1.00000000 sec
TD0           1

===== CHANNEL f1 =====
NUC1          1H
P1            11.80 usec
PL1           0.00 dB
PL1W          11.55467796 W
SF01          300.1318534 MHz
SI            32768
SF            300.1300019 MHz
WDW           EM
SSB           0
LB            0.30 Hz
GB            0
PC            1.00

```

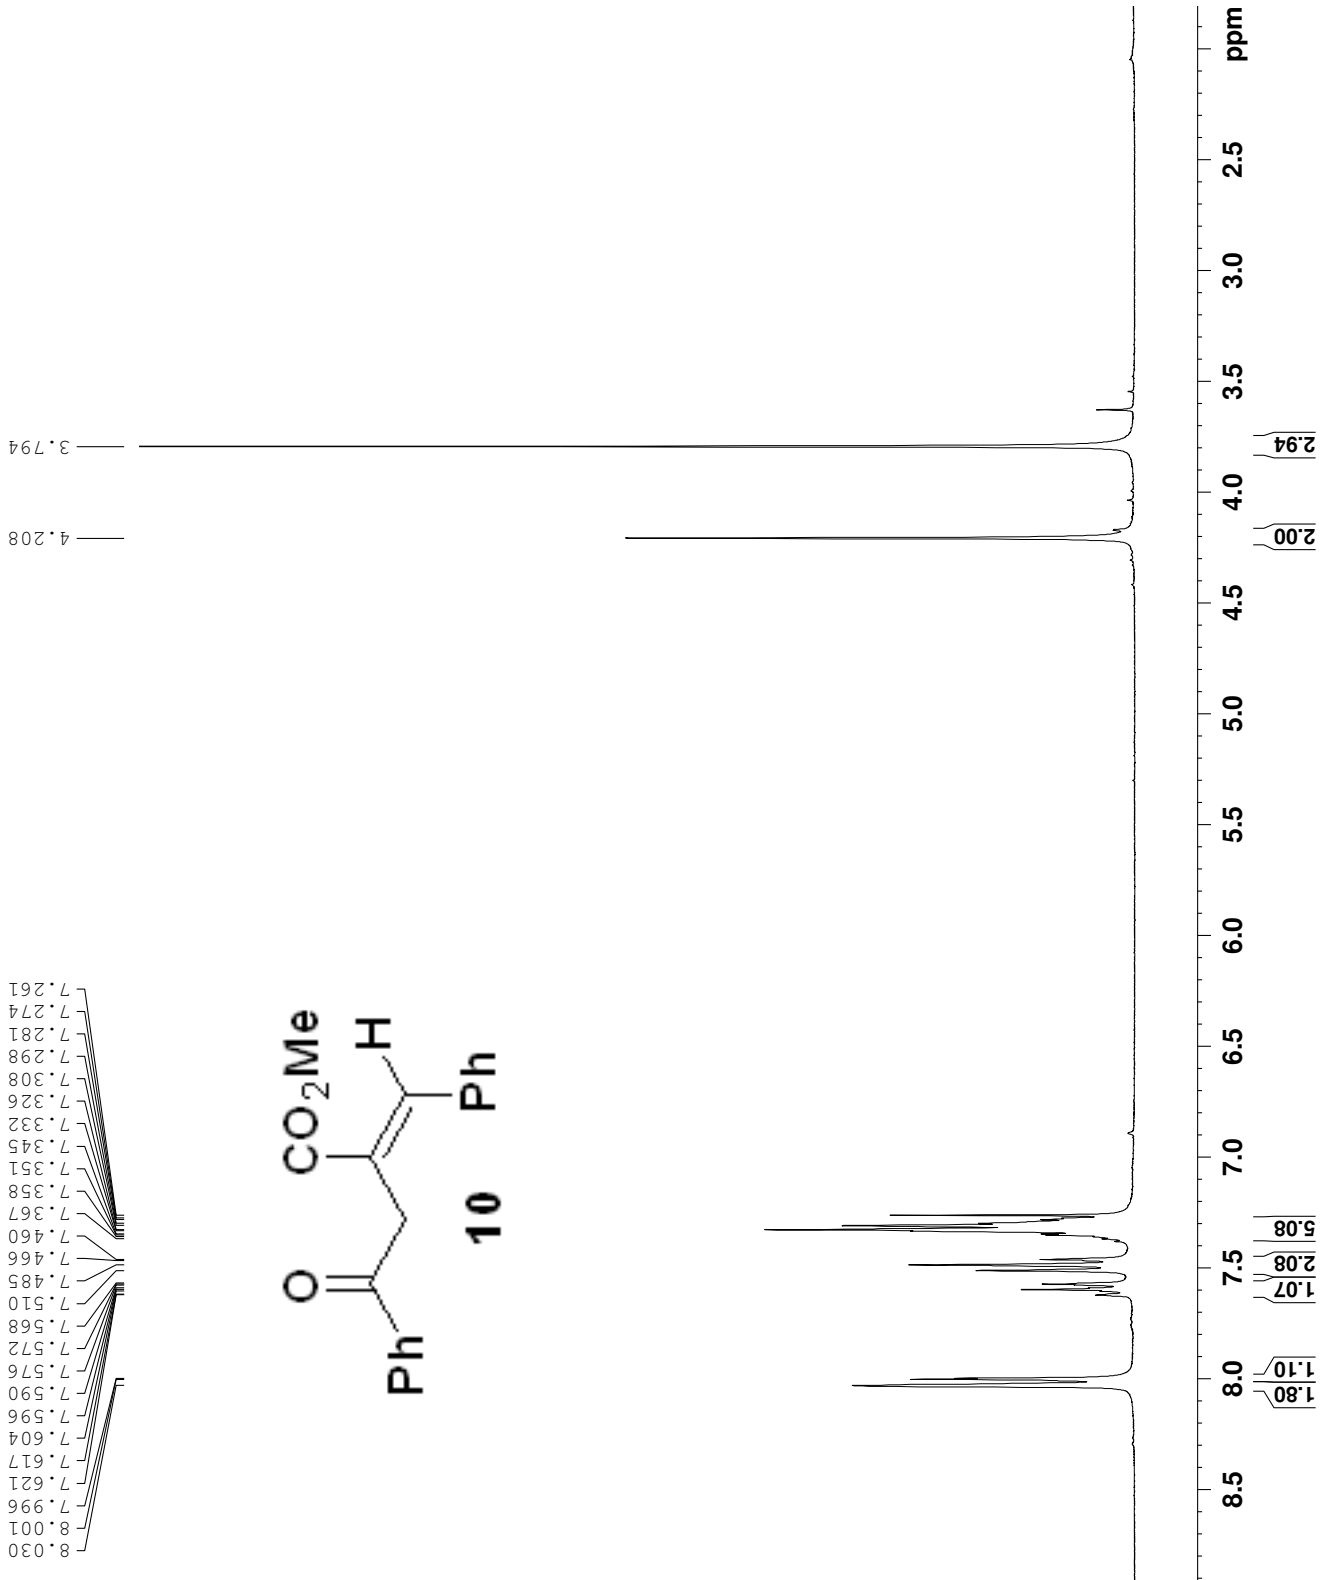

```

NAME lan091202
EXPNO 3
PROCNO 1
Date_ 20091202
Time_ 15:18
INSTRUM spect
PROBHD 5 mm PABBO BB-
PULPROG zgpg30
TD 65336
SOLVENT CDCl3
NS 1024
DS 4
SWH 18028.846 Hz
FIDRES 0.275098 Hz
AQ 1.8175818 sec
RG 203
DM 27.733 usec
DE 6.50 usec
TE 290.4 K
D1 2.00000000 sec
D11 0.03000000 sec
TD0 1

===== CHANNEL f1 =====
NUC1 13C
P1 9.70 usec
PL1 0.00 dB
PL1W 29.38907051 W
SFO1 75.4752953 MHz

===== CHANNEL f2 =====
CPDPRG2 waitz16
NUC2 1H
P2 80.00 usec
PL2 1.00 dB
PL2 1.00 dB
PL1 2 17.00 dB
PL1 3 17.00 dB
PL1 2W 9.17820644 W
PL1 2W 0.23054613 W
PL1 3W 0.23054613 W
SFO2 300.1312005 MHz
SI 32768
SF 75.4677498 MHz
WDW EM
SSB 0
LB 1.00 Hz
GB 0
PC 1.40

```

38.08  
52.23  
76.58  
77.00  
77.42

126.97  
128.27  
128.59  
128.64  
128.74  
128.74  
133.27  
135.22  
136.60  
142.28

167.93  
197.32

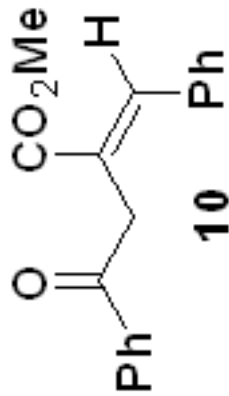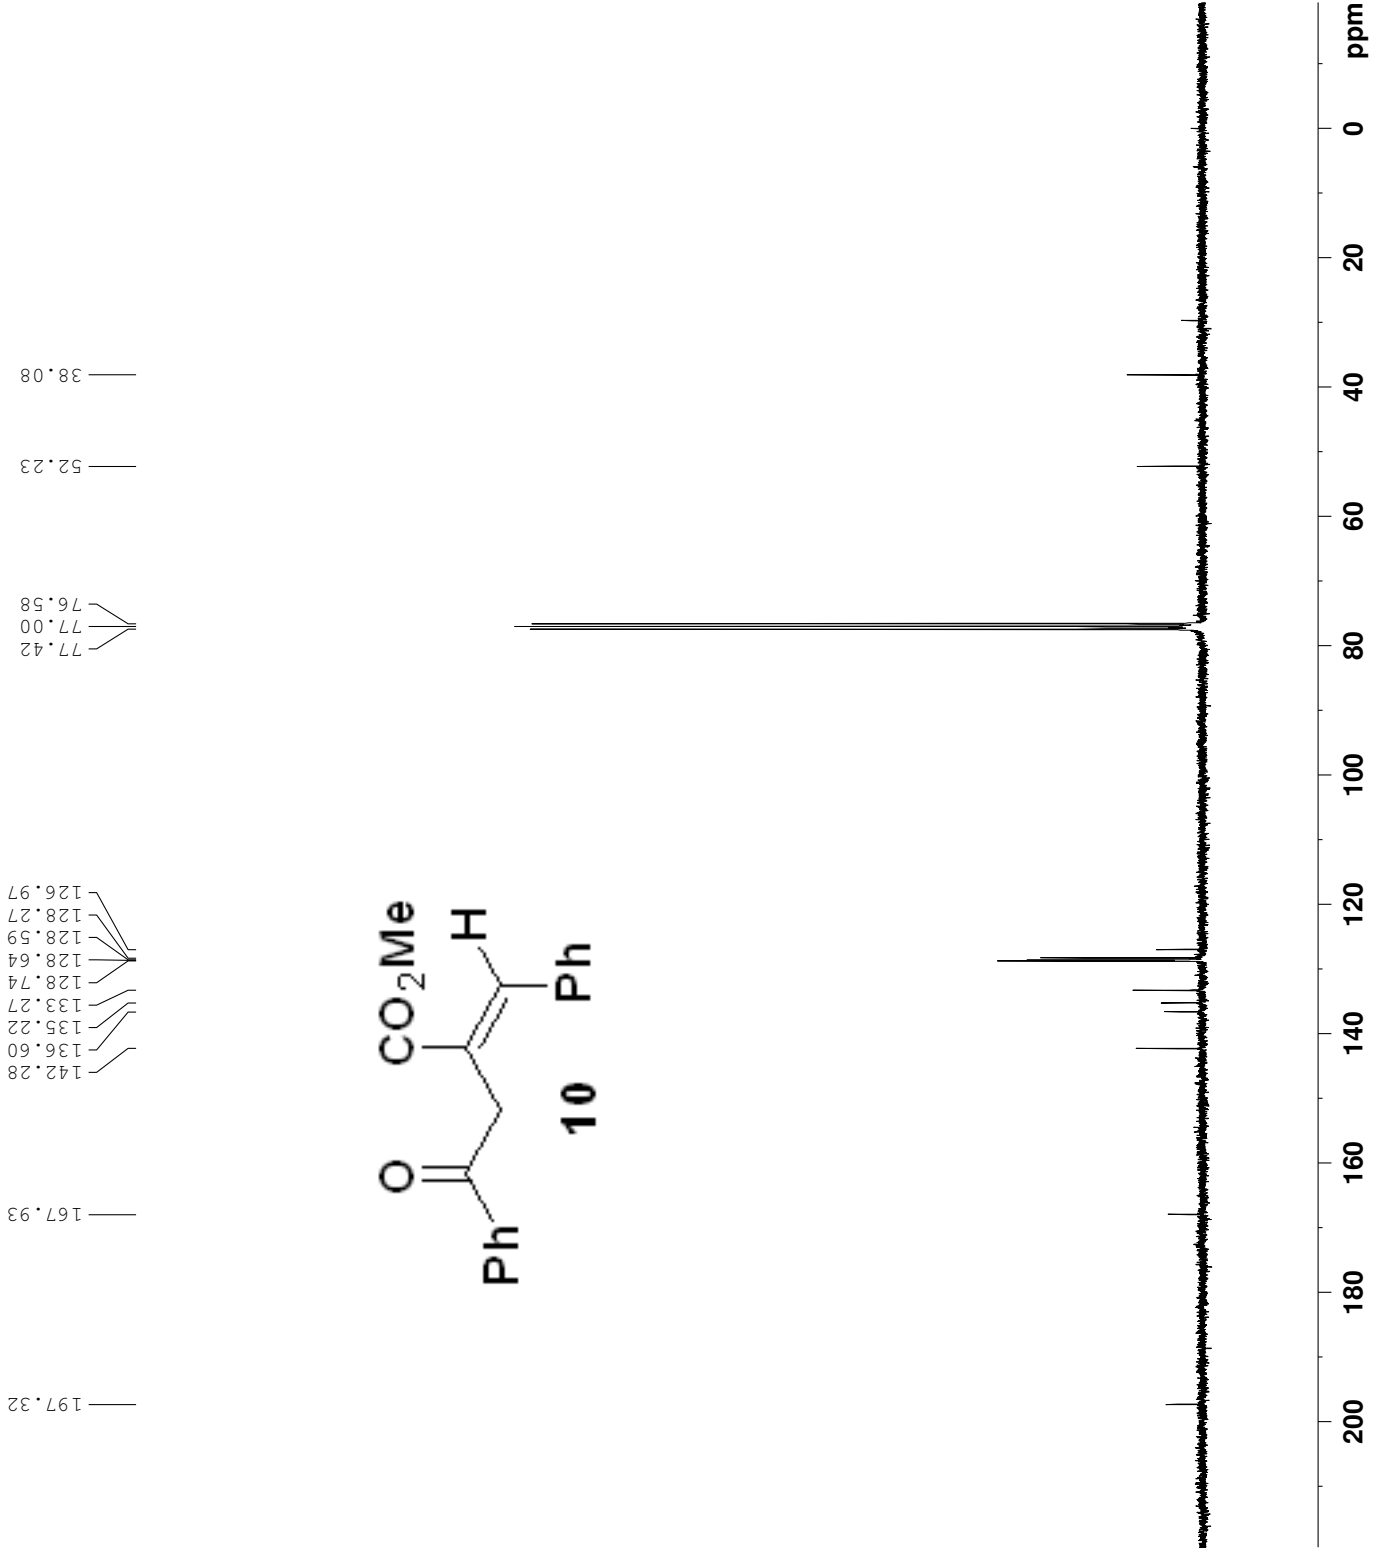



```

NAME          L1D1L1ZU10052U
EXPNO         1
PROCNO        1
Date_         20100520
Time          17.59
INSTRUM       spect
PROBHD        5 mm PABBO BB-
PULPROG       zg30
TD            65536
SOLVENT       CDCl3
NS            8
DS            2
SWH           6188.119 Hz
FIDRES        0.094423 Hz
AQ            5.2953587 sec
RG            57
DW            80.800 usec
DE            6.50 usec
TE            289.4 K
D1            1.00000000 sec
TD0           1

===== CHANNEL f1 =====
NUC1          1H
P1            11.80 usec
PL1           0.00 dB
PL1W         11.55467796 W
SF01         300.1318534 MHz
SI           32768
SF           300.1300040 MHz
EM
SSB           0
LB            0.30 Hz
GB            0
PC            1.00

```

0.000

7.499  
7.479  
7.474  
7.458  
7.453  
7.447  
7.439  
7.429  
7.423  
7.415  
7.407  
7.404  
7.402  
7.391  
7.376  
7.365  
7.349  
7.343  
7.336  
7.322  
7.254  
5.636  
5.616  
5.608  
5.588  
3.749  
3.740  
3.721  
3.712  
3.696  
3.690  
3.681  
3.662  
3.653  
3.206  
3.196  
3.186  
3.176  
3.147  
3.137  
3.127  
3.117

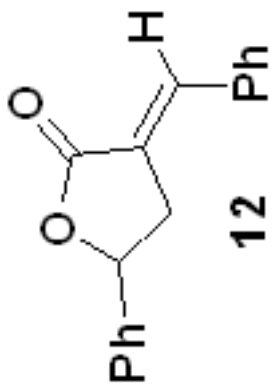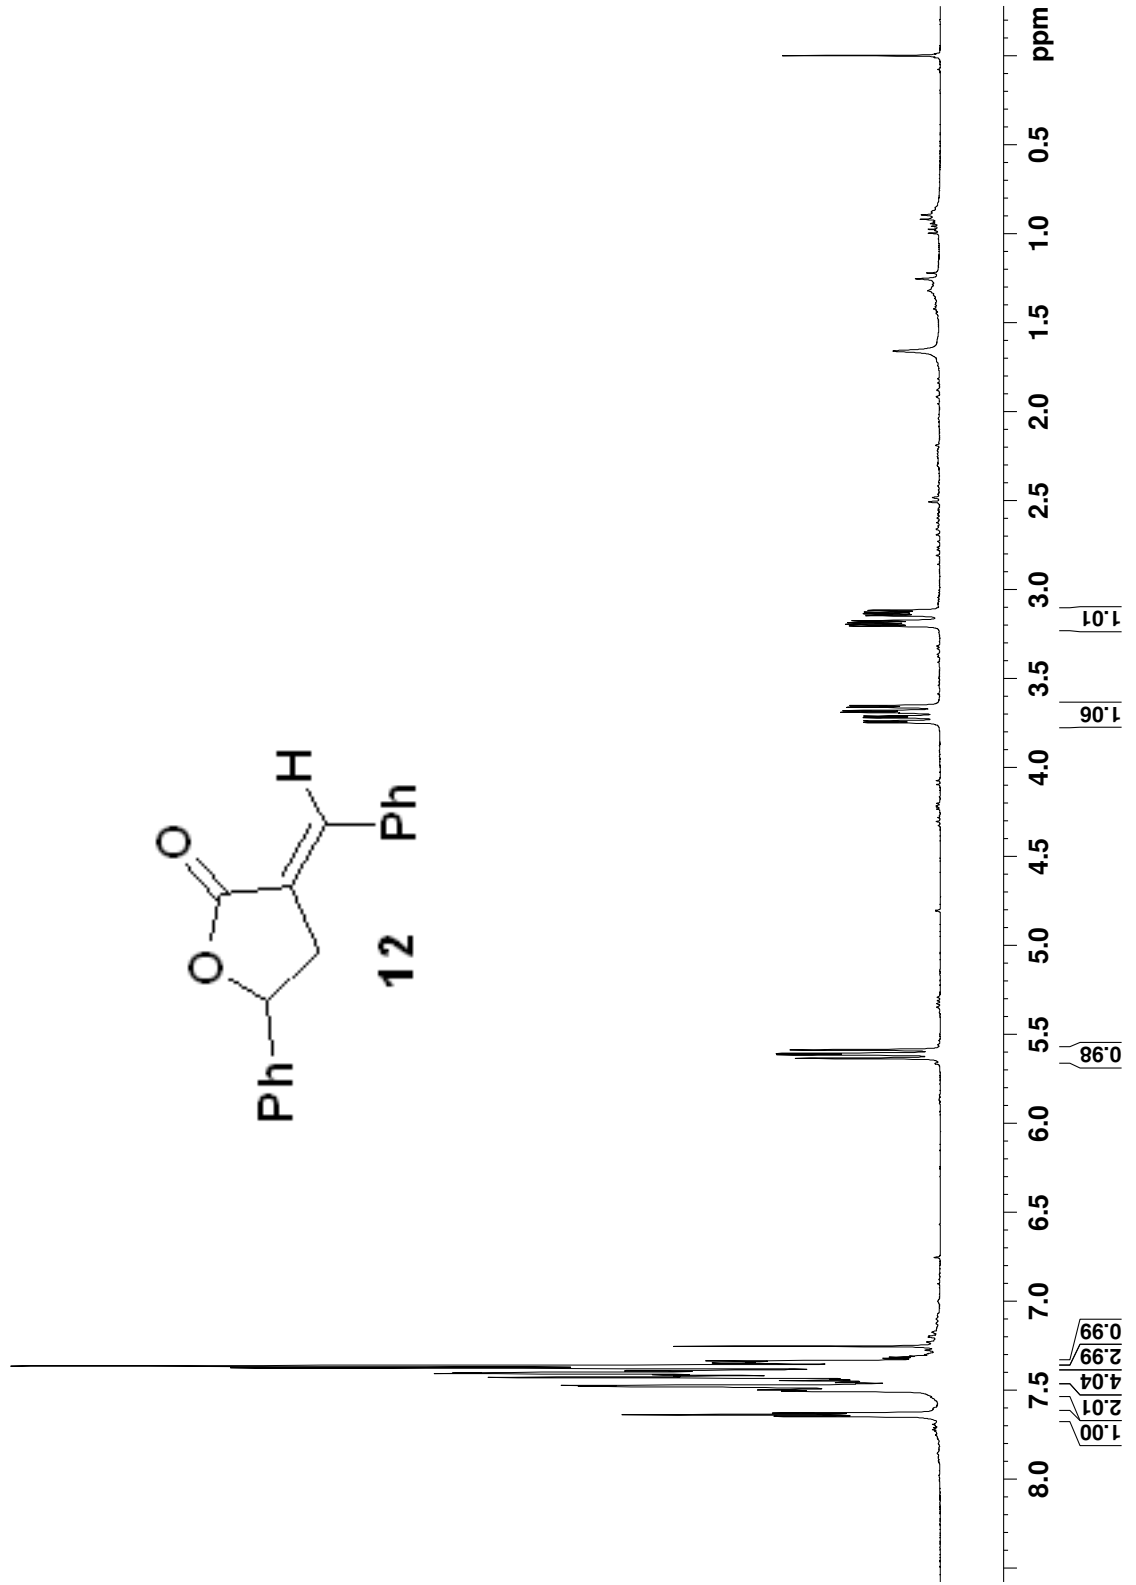



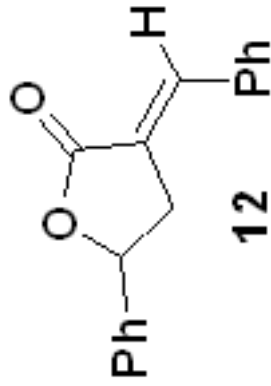

```

NAME L1nL120100520
EXPNO 3
PROCNO 1
Date_ 20100520
Time 19:09
INSTRUM spect
PROBHD 5 mm PABBO B1
PULPROG zgpg30
TD 65536
SOLVENT CDCl3
NS 66
SMH 18028.846 Hz
FIDRES 0.275098 Hz
AQ 1.8175818 sec
RG 27.733 usec
DE 6.50 usec
TE 297.6 K
CST2 145.000000 sec
D1 2.00000000 sec
D2 0.00344828 sec
DELTA 1.72
TD0 0.00002000 sec
  
```

```

===== CHANNEL f1 =====
NUC1 13C
P1 9.70 usec
P2 19.40 usec
PL1 0.00 dB
PL2 0.00 dB
PL3 0.00 dB
SFO1 75.4752953 MHz
  
```

```

===== CHANNEL f2 =====
CPDPRG2 waltz16
NUC2 1H
P3 13.00 usec
P4 26.00 usec
P5 13.00 usec
P6 26.00 usec
PL12 1.00 dB
PL13 17.00 dB
PL14 17.00 dB
PL15 17.00 dB
PL16 17.00 dB
PL17 17.00 dB
PL18 17.00 dB
SFO2 300.1312005 MHz
SI 32768
SM 0
WDW EM
SSB 0
LB 1.00 Hz
GB 0
PC 1.40
  
```

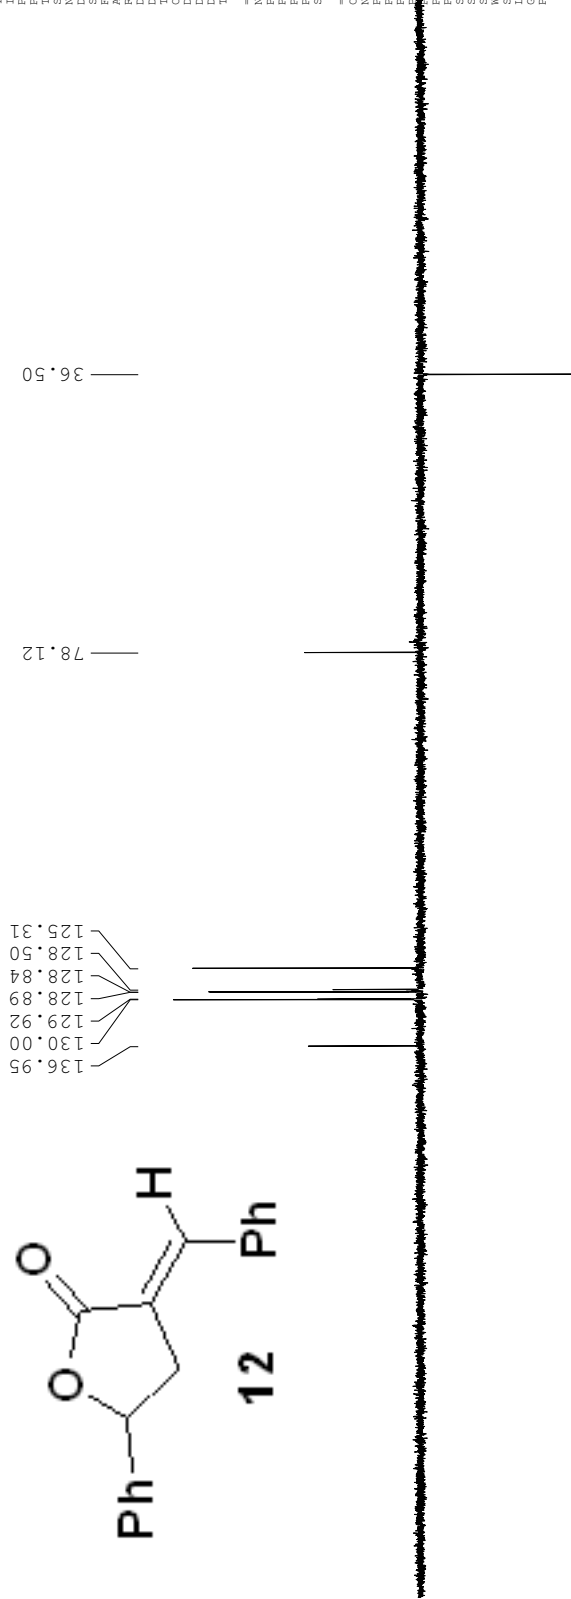

```

NAME L1nL120100520
EXPNO 2
PROCNO 1
Date_ 20100520
Time 19:05
INSTRUM spect
PROBHD 5 mm PABBO B1
PULPROG zgpg30
TD 65536
SOLVENT CDCl3
NS 994
SMH 18028.846 Hz
FIDRES 0.275098 Hz
AQ 1.8175818 sec
RG 27.733 usec
DE 6.50 usec
TE 297.6 K
CST2 145.000000 sec
D1 2.00000000 sec
D2 0.00344828 sec
DELTA 1.72
TD0 0.00002000 sec
  
```

```

===== CHANNEL f1 =====
NUC1 13C
P1 9.70 usec
P2 19.40 usec
PL1 0.00 dB
PL2 0.00 dB
PL3 0.00 dB
SFO1 75.4752953 MHz
  
```

```

===== CHANNEL f2 =====
CPDPRG2 waltz16
NUC2 1H
P3 13.00 usec
P4 26.00 usec
P5 13.00 usec
P6 26.00 usec
PL12 1.00 dB
PL13 17.00 dB
PL14 17.00 dB
PL15 17.00 dB
PL16 17.00 dB
PL17 17.00 dB
PL18 17.00 dB
SFO2 300.1312005 MHz
SI 32768
SM 0
WDW EM
SSB 0
LB 1.00 Hz
GB 0
PC 1.40
  
```

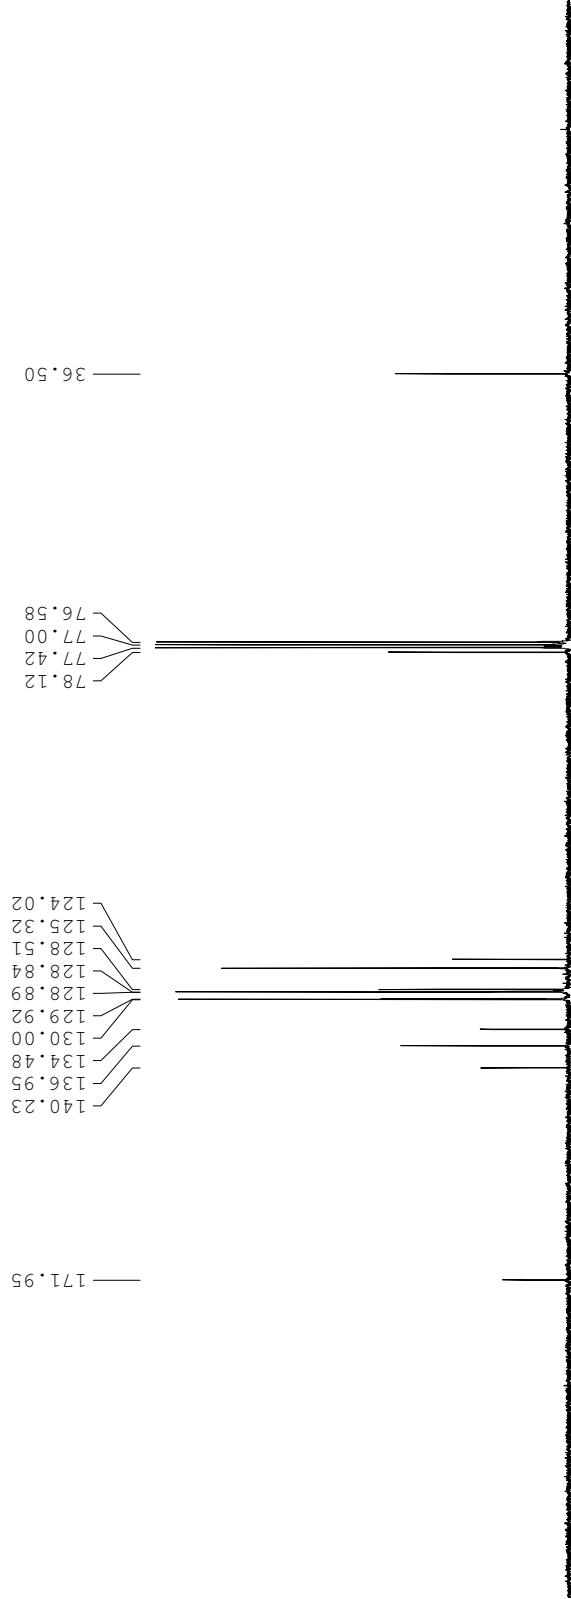

Supplement: c7ob00131b1.pdf [file c7ob00131b1.pdf]
